# Supplementary material for: Synthesis and evaluation ofNα,Nε-diacetyl-l-lysine-inositol conjugates as cancer-selective probes for metabolic engineering of GPIs and GPI-anchored proteins
Source: Royal Society of Chemistry journal article supplement (doi:10.1039/d0ob00333f), 2020-01-01

***Supporting Information***

***for***

**Synthesis and evaluation of  $N^\alpha, N^\epsilon$ -diacetyl-L-lysine-inositol conjugates as cancer-selective probes for  
metabolic engineering of GPIs and GPI-anchored proteins**

Mohit Jaiswal<sup>†</sup>, Sanyong Zhu<sup>†</sup>, Wenjie Jiang, and Zhongwu Guo\*

Department of Chemistry, University of Florida, 214 Leigh Hall, Gainesville, FL 32611, United States of America

\*Corresponding author e-mail: [zguo@chem.ufl.edu](mailto:zguo@chem.ufl.edu)

**Table of Contents**

|                                            |             |
|--------------------------------------------|-------------|
| I. Supplementary Flow Cytometry Data ----- | Page S2-S5  |
| II. NMR and MS Spectra of Compounds -----  | Page S6-S76 |

## I. Supplementary Flow Cytometry Data

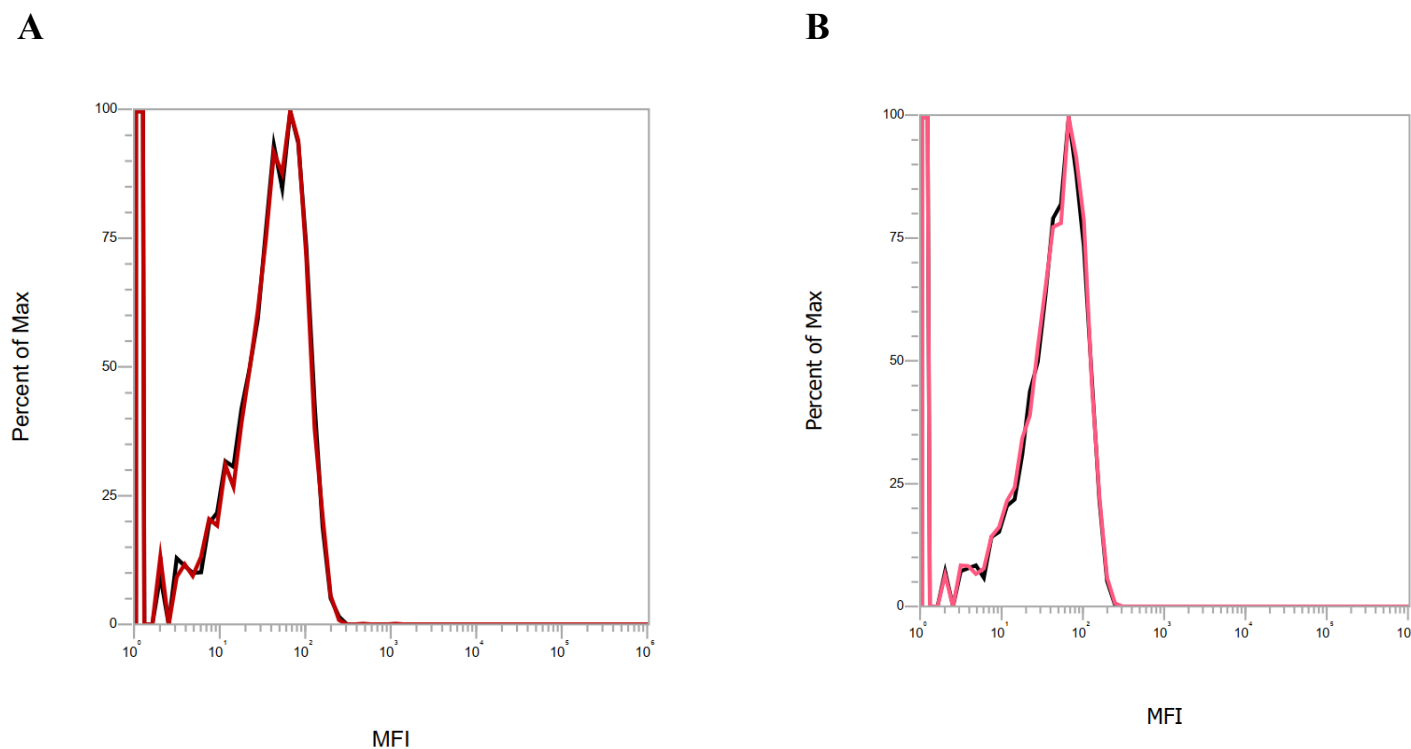

**Figure S1:** Flow cytometry results of HEK293 cell treated with 200  $\mu$ M of **1** (A) or **2** (B) (red) against cell treated with PBS (control group, black) for 48 h, followed by click reaction with DBCO-Cy5 (50  $\mu$ M, 37  $^{\circ}$ C, 1 h). More than 10,000 events were recorded during each experiment and three replicate experiments were performed.

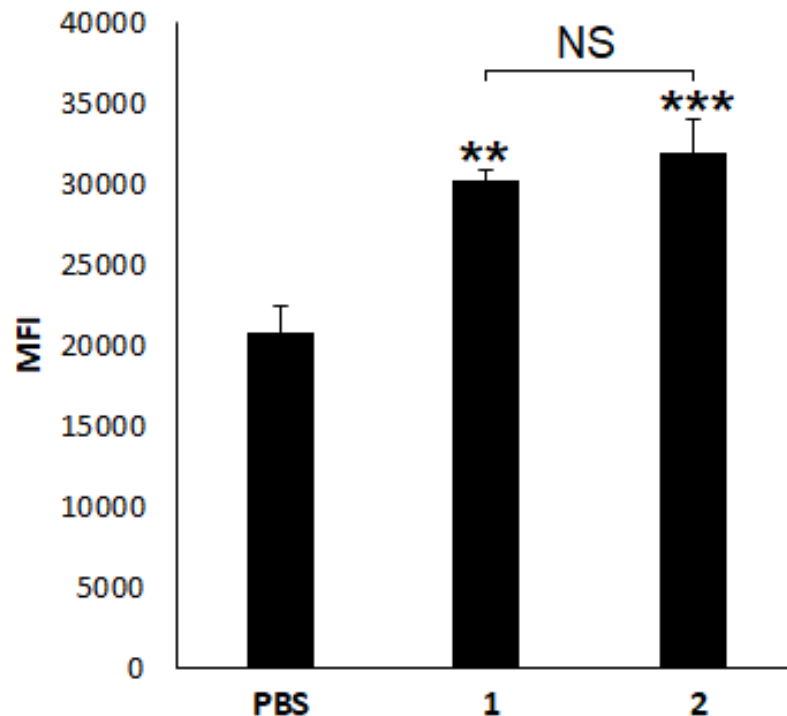

**Figure S2:** Flow cytometry results of MCF-7 cell treated with PBS (control) or with 200  $\mu$ M of **1** or **2** for 48 h and then with DBCO-Cy5 (50  $\mu$ M, 37  $^{\circ}$ C, 1 h). Data are presented as mean  $\pm$  standard deviation of three parallel experiments and analyzed by two-tailed student's *t* test: \*\*statistically very different ( $P \leq 0.01$ ) from the PBS group; \*\*\*statistically extremely different ( $P \leq 0.001$ ) from the PBS group; NS, no significant difference ( $P > 0.05$ ).

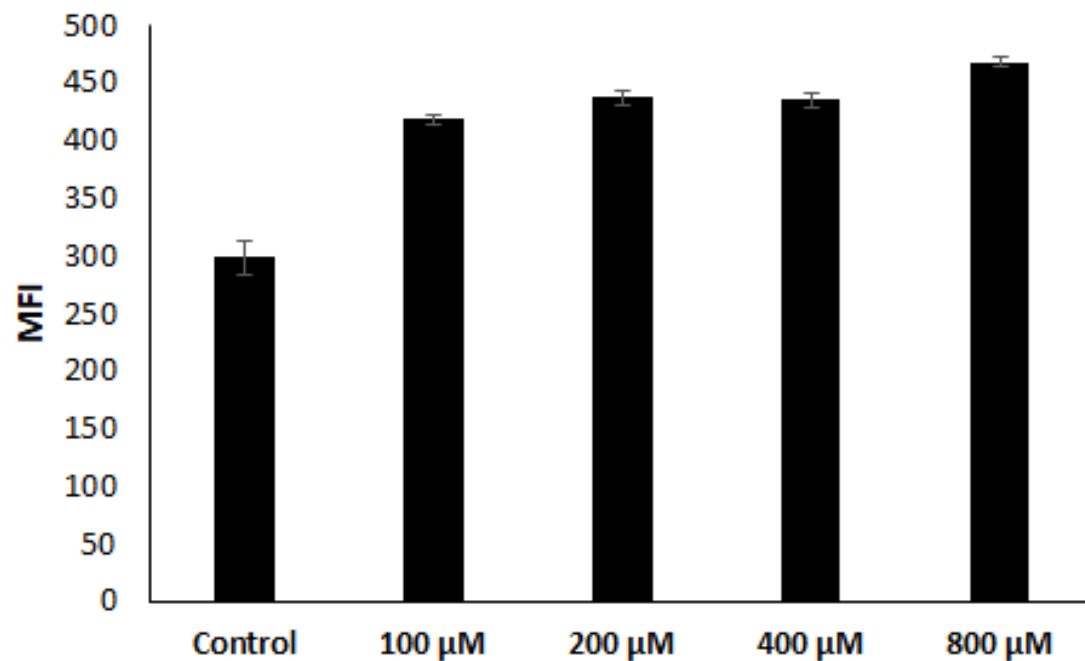

**Figure S3:** Flow cytometry results of MCF-7 cell treated with PBS (control) or with various concentrations (100-800  $\mu$ M) of **1** for 48 h and then with DBCO-Cy5 (50  $\mu$ M, 37  $^{\circ}$ C, 1 h). Data are presented as mean  $\pm$  standard deviation of three parallel experiments. Difference of the treatment groups with the control (PBS) group was all statistically significant ( $P \leq 0.05$ ).

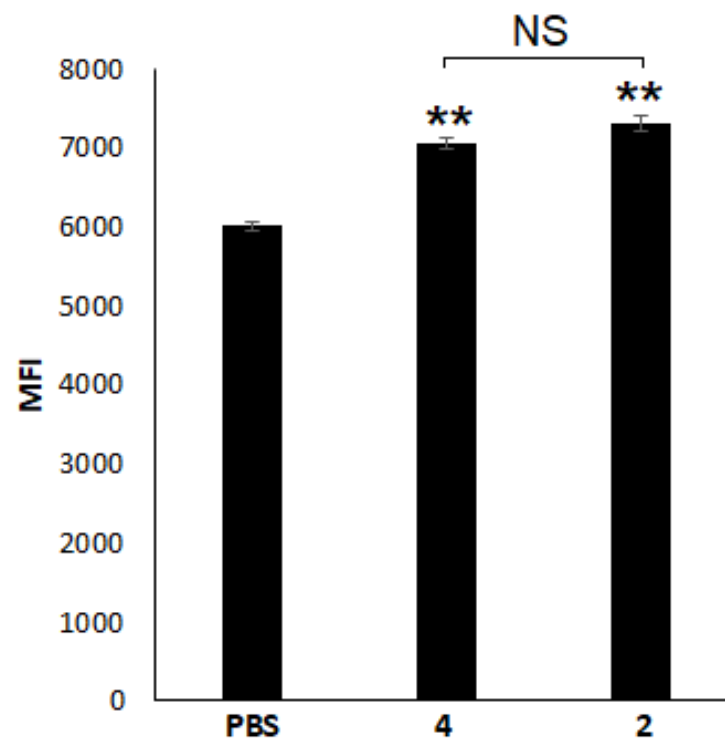

**Figure S4:** Flow cytometry results of HepG2 cell treated with PBS (control) or with 200  $\mu$ M of **2** or **4** for 48 h and then with DBCO-Cy5 (50  $\mu$ M, 37  $^{\circ}$ C, 1 h). Data are presented as mean  $\pm$  standard deviation of two parallel experiments and analyzed by two-tailed student's *t* test: \*\*statistically very different ( $P \leq 0.01$ ) from the PBS group; NS, no significant difference ( $P > 0.05$ ).

## II. NMR and MS Spectra of Compounds

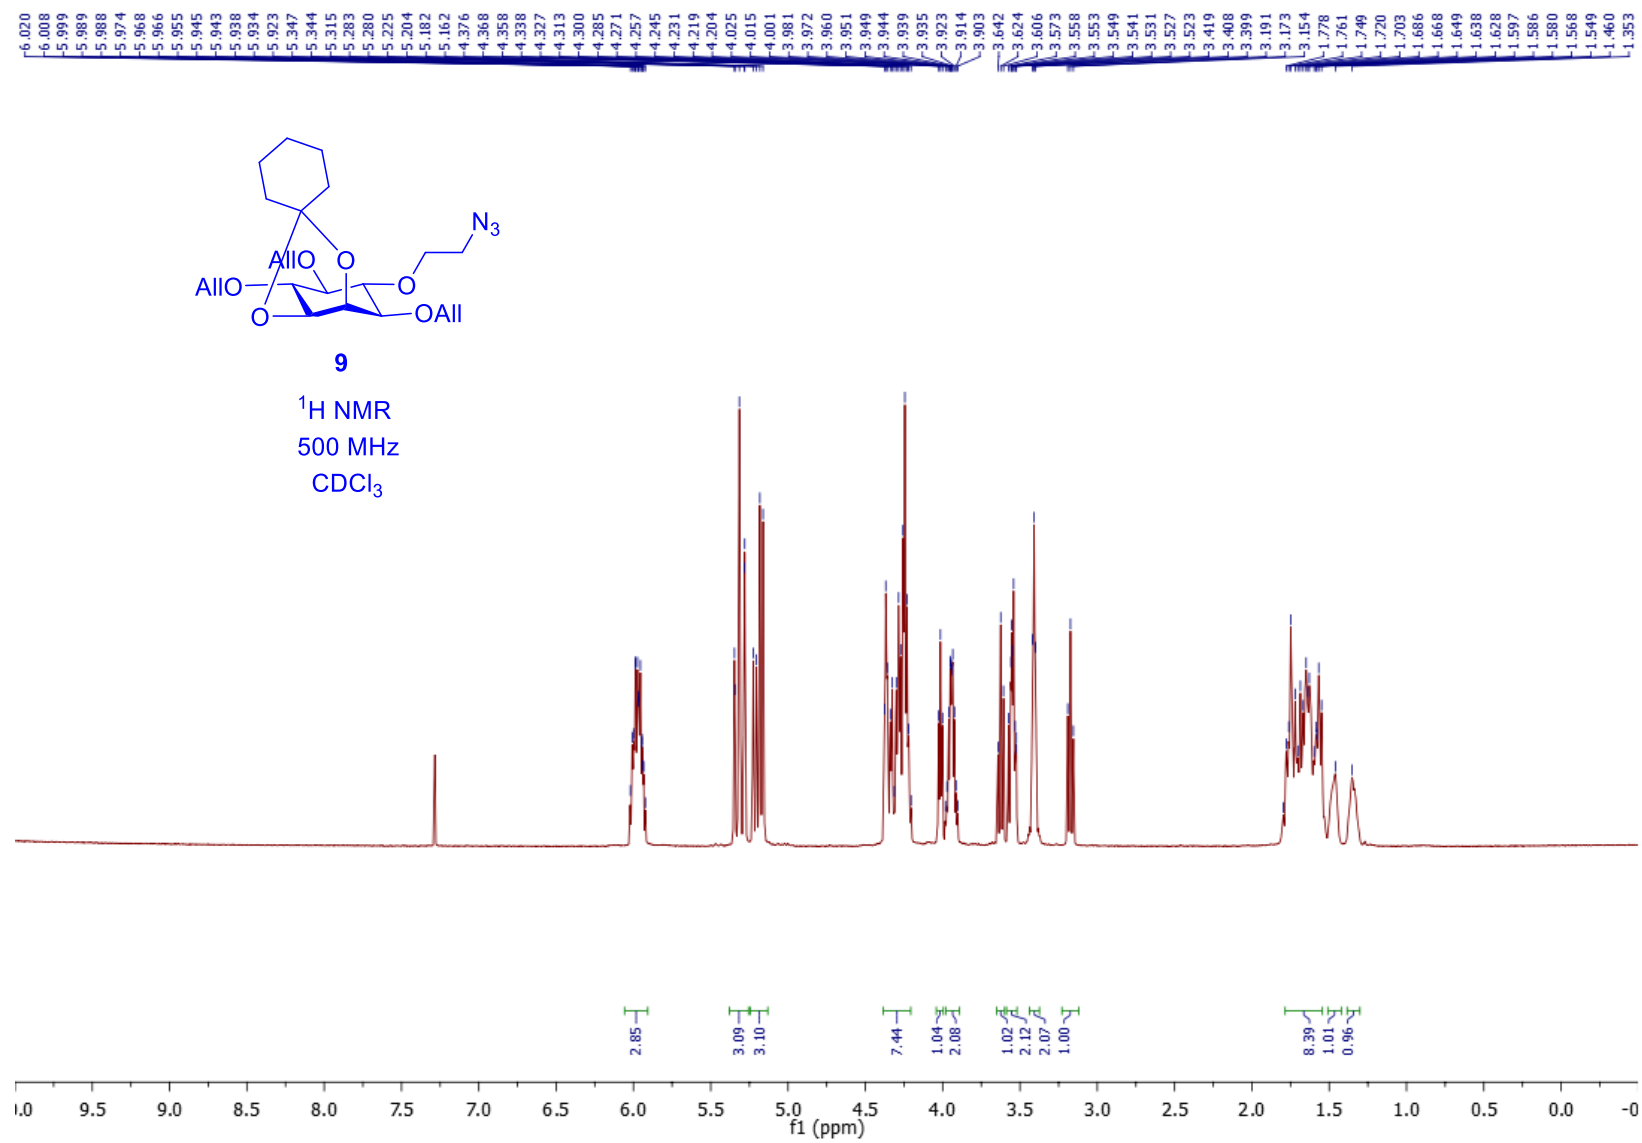

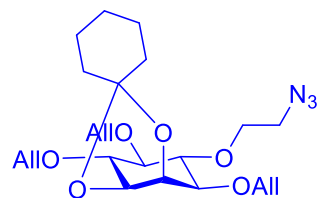

**9**

<sup>13</sup>C NMR  
125 MHz  
CDCl<sub>3</sub>

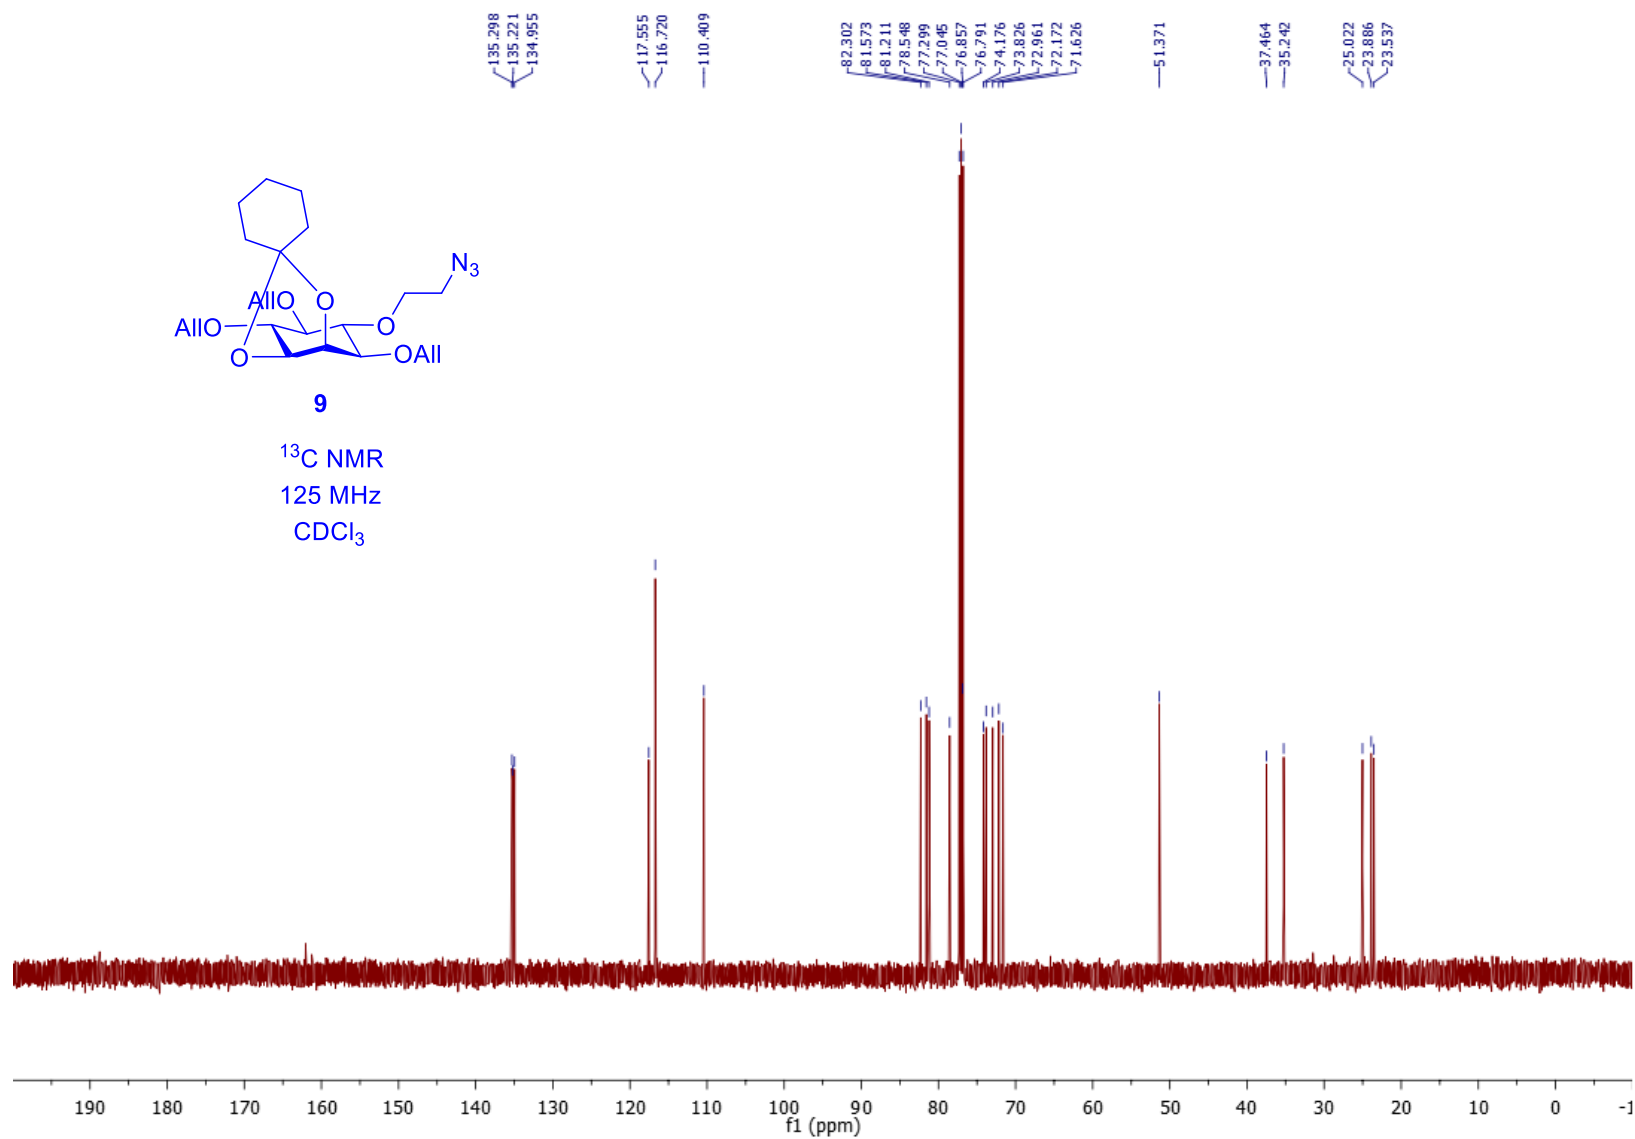

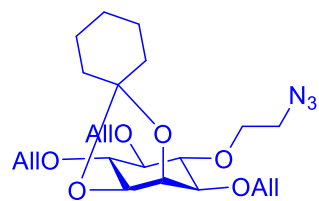

9

$^1\text{H}$ - $^1\text{H}$  COSY  
500 MHz  
 $\text{CDCl}_3$

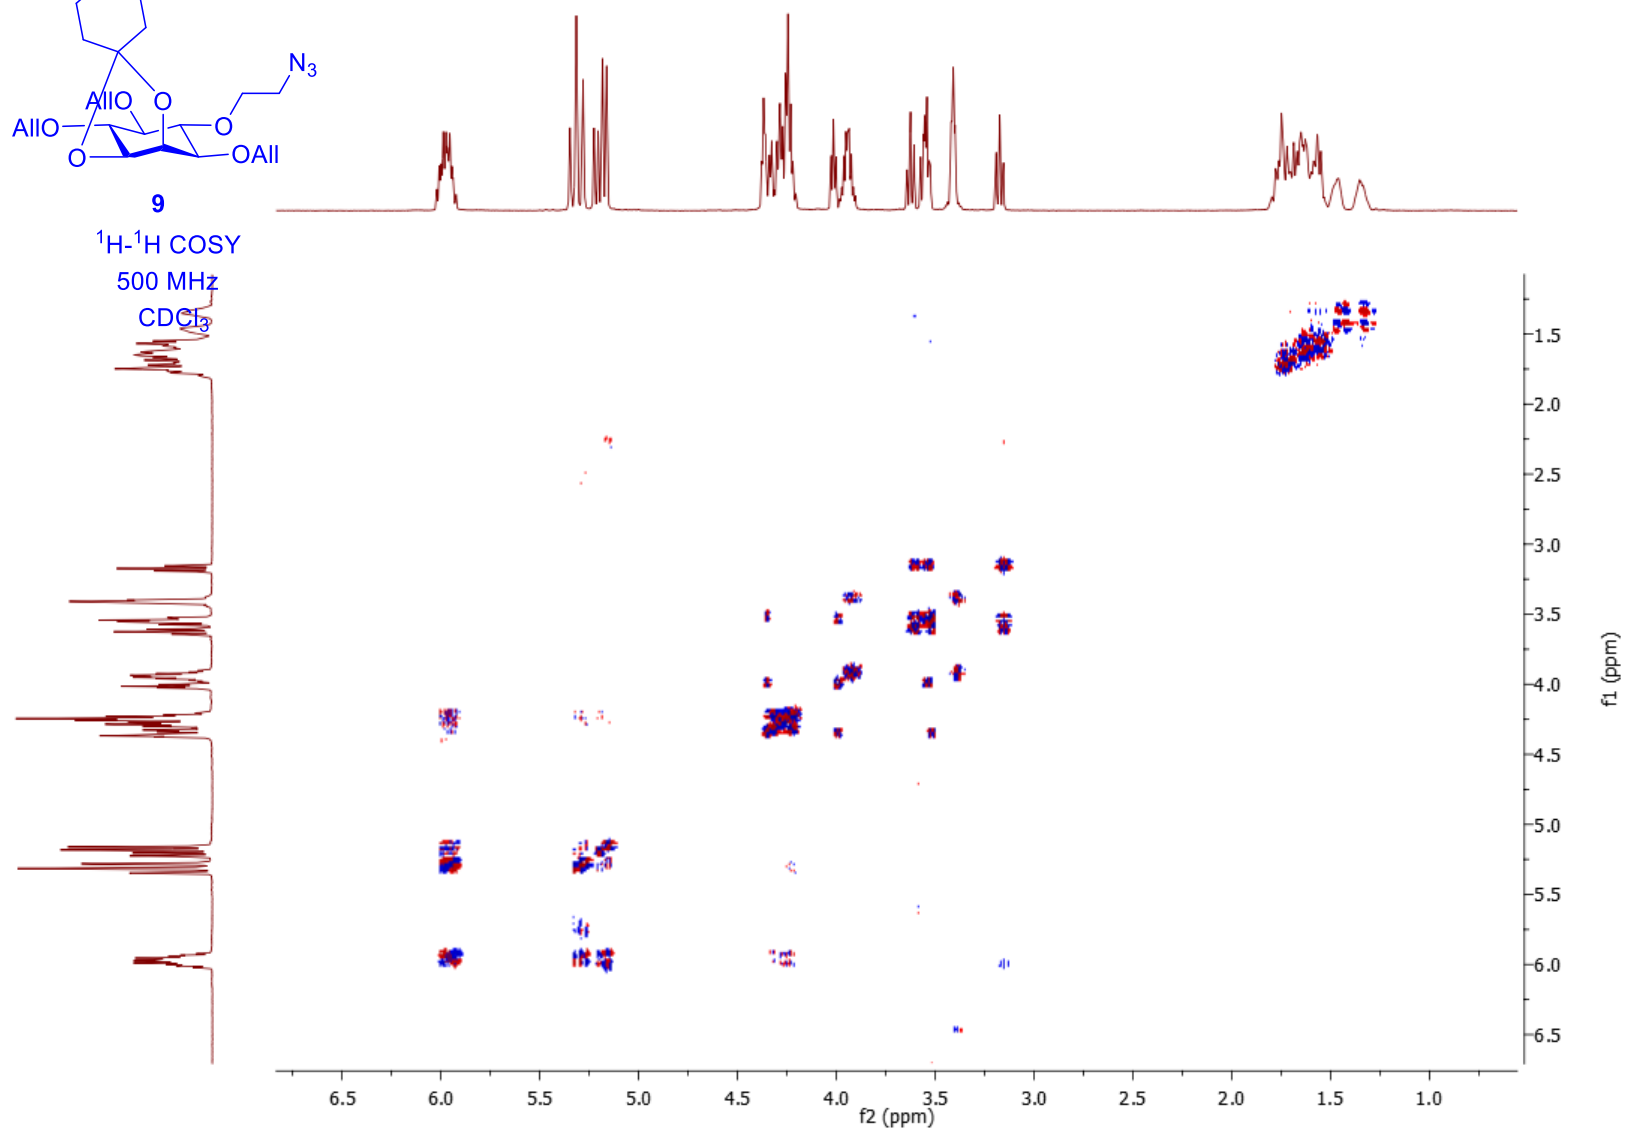



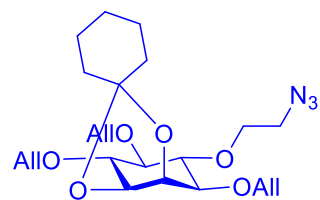

9

$^1\text{H}$ - $^{13}\text{C}$  HSQC

500/125 MHz

$\text{CDCl}_3$

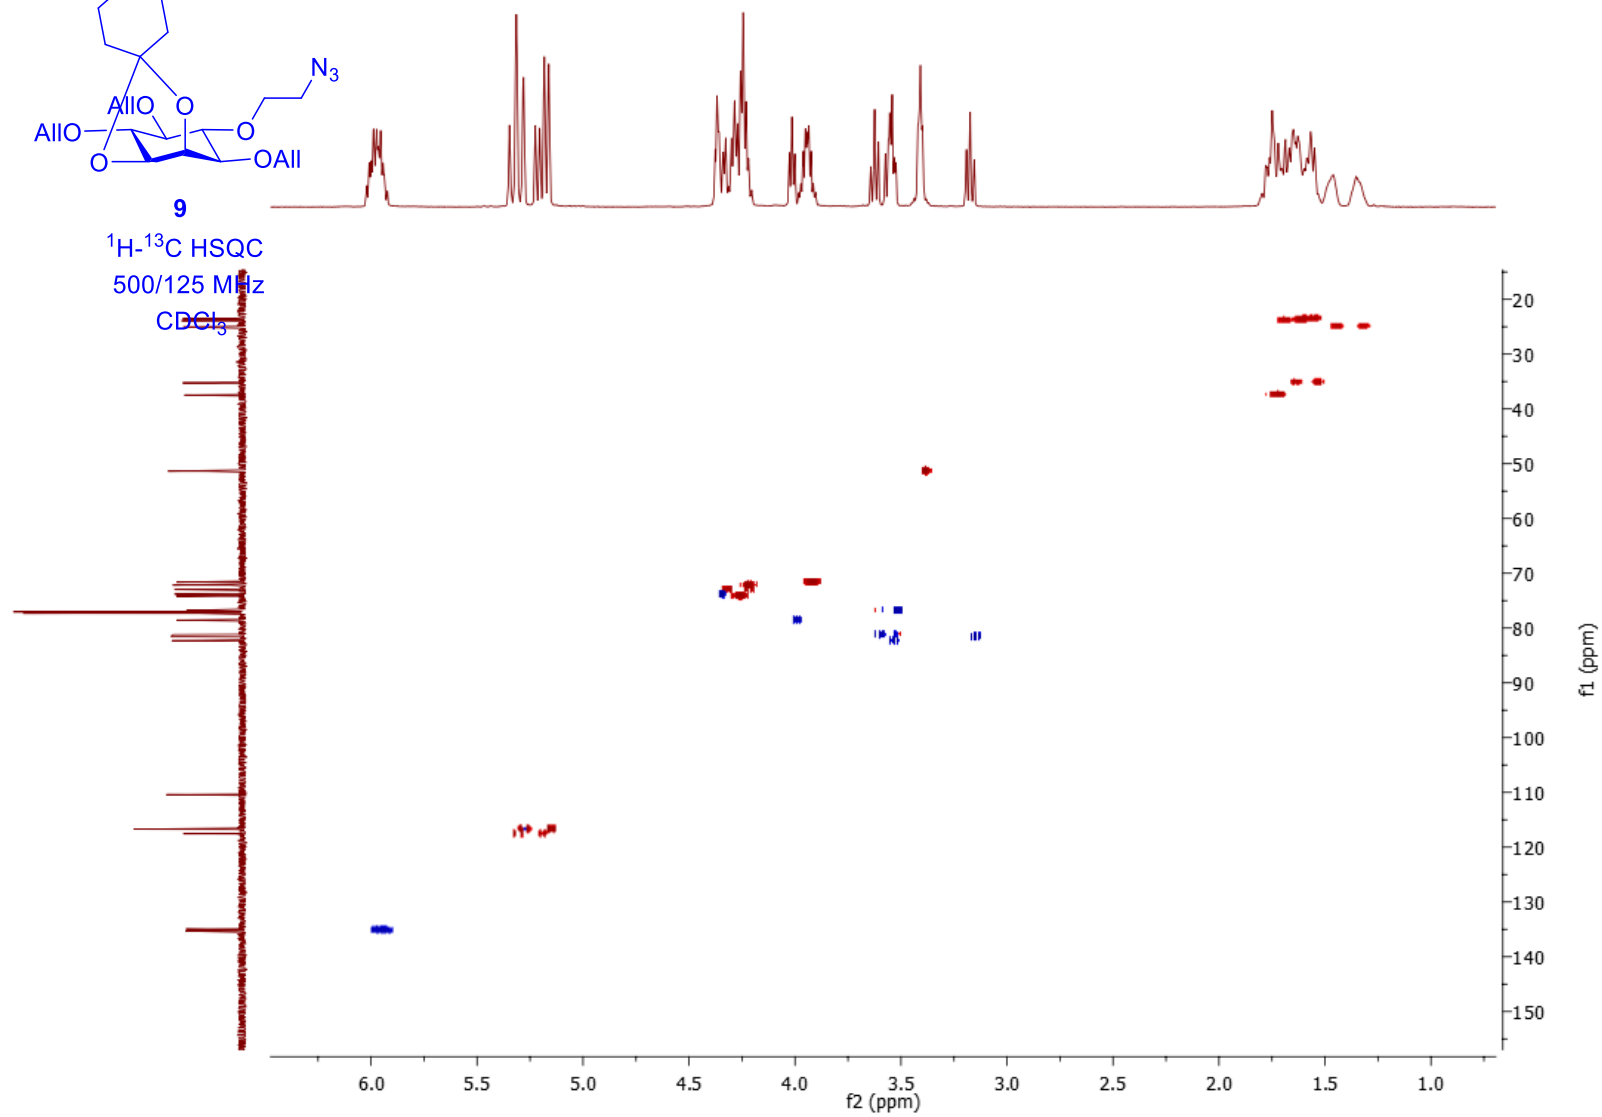

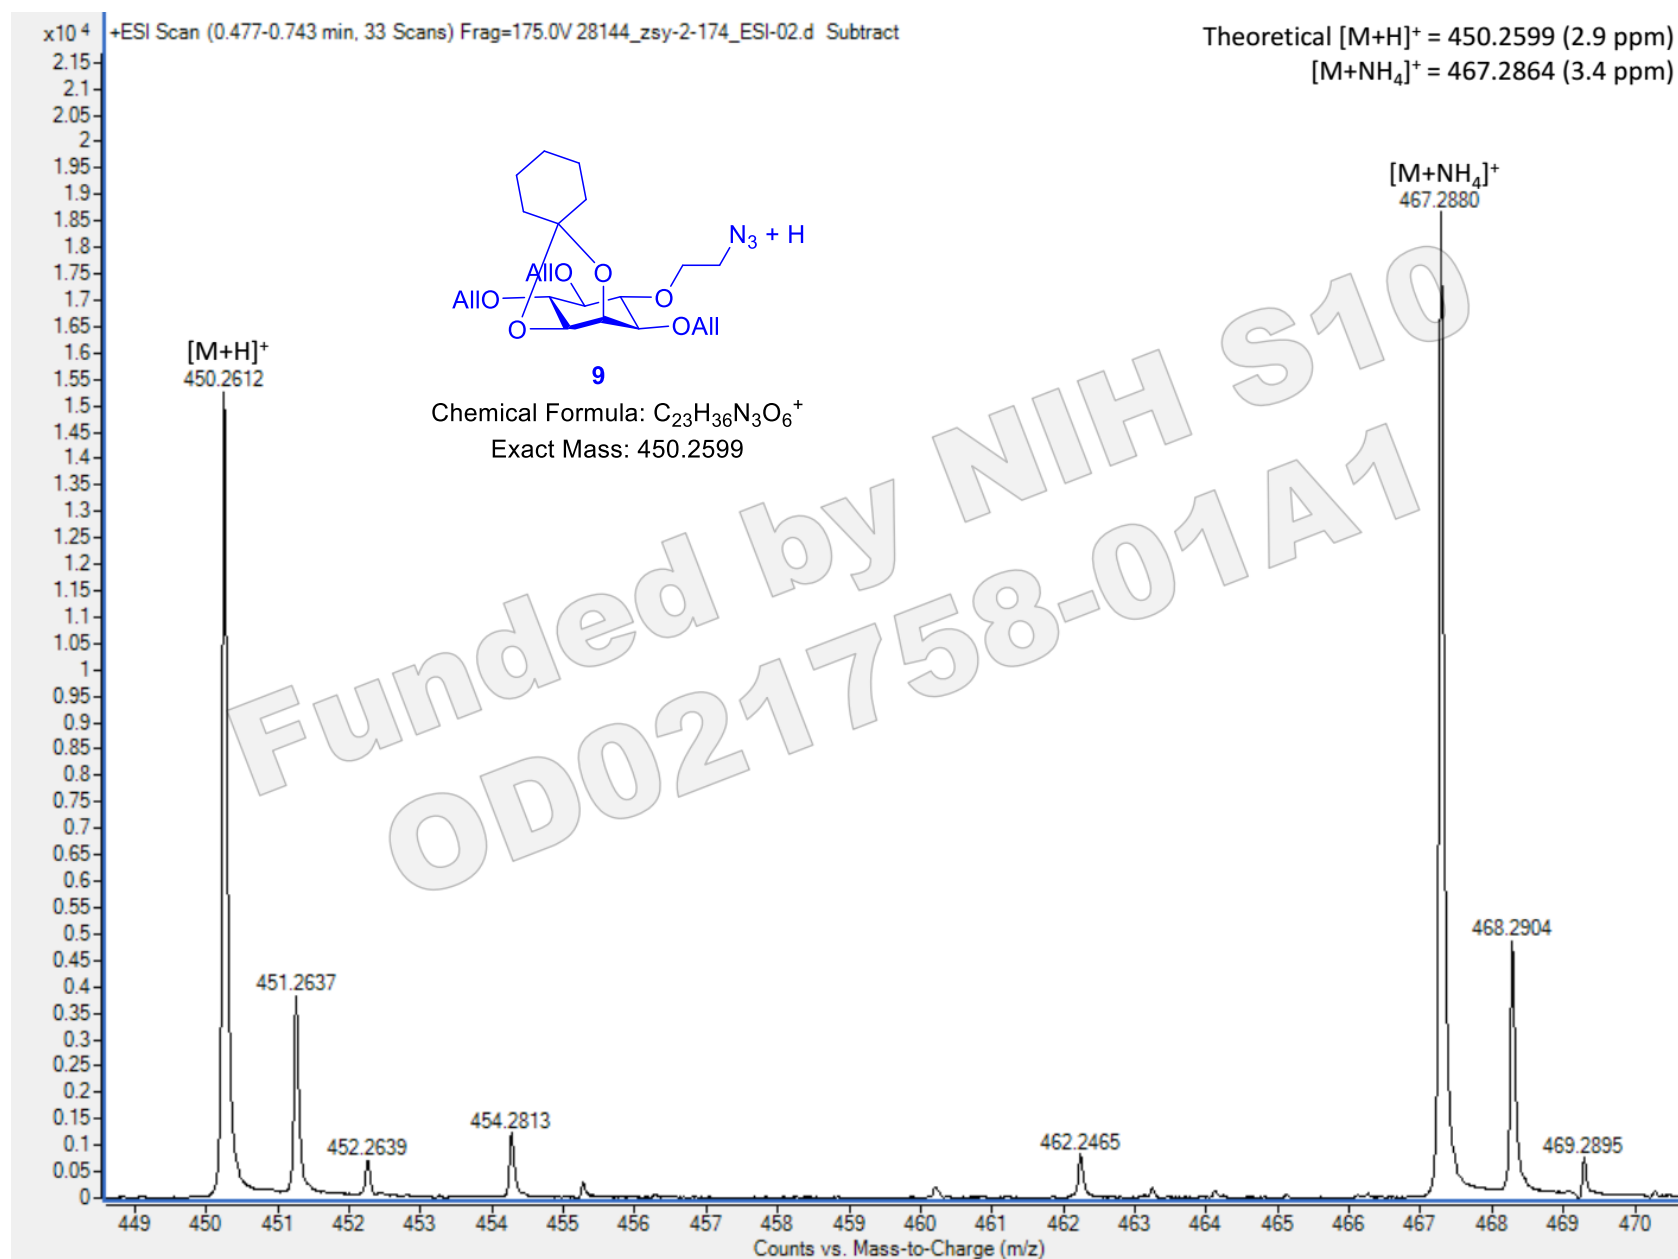

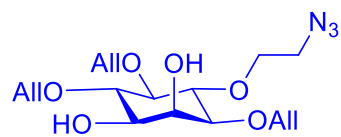

**10**

$^1\text{H}$  NMR  
500 MHz  
 $\text{CDCl}_3$

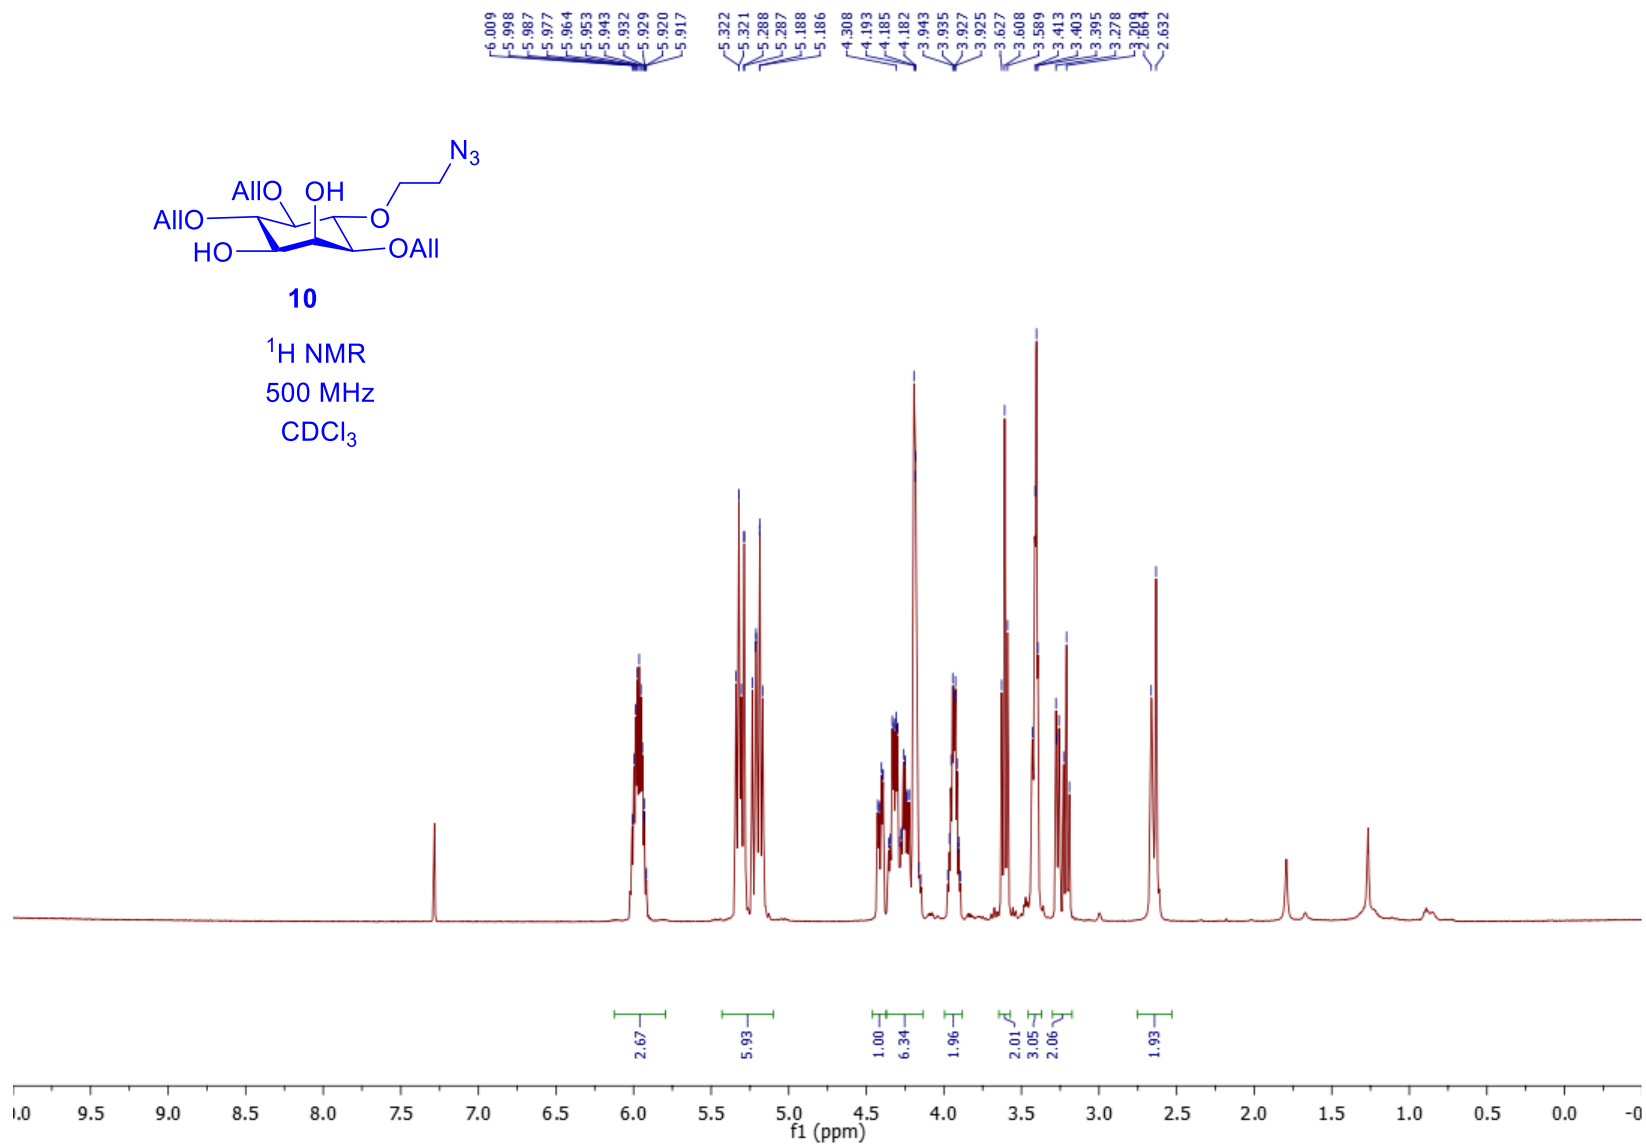

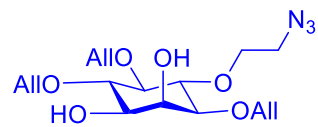

**10**

$^{13}\text{C}$  NMR

125 MHz

$\text{CDCl}_3$

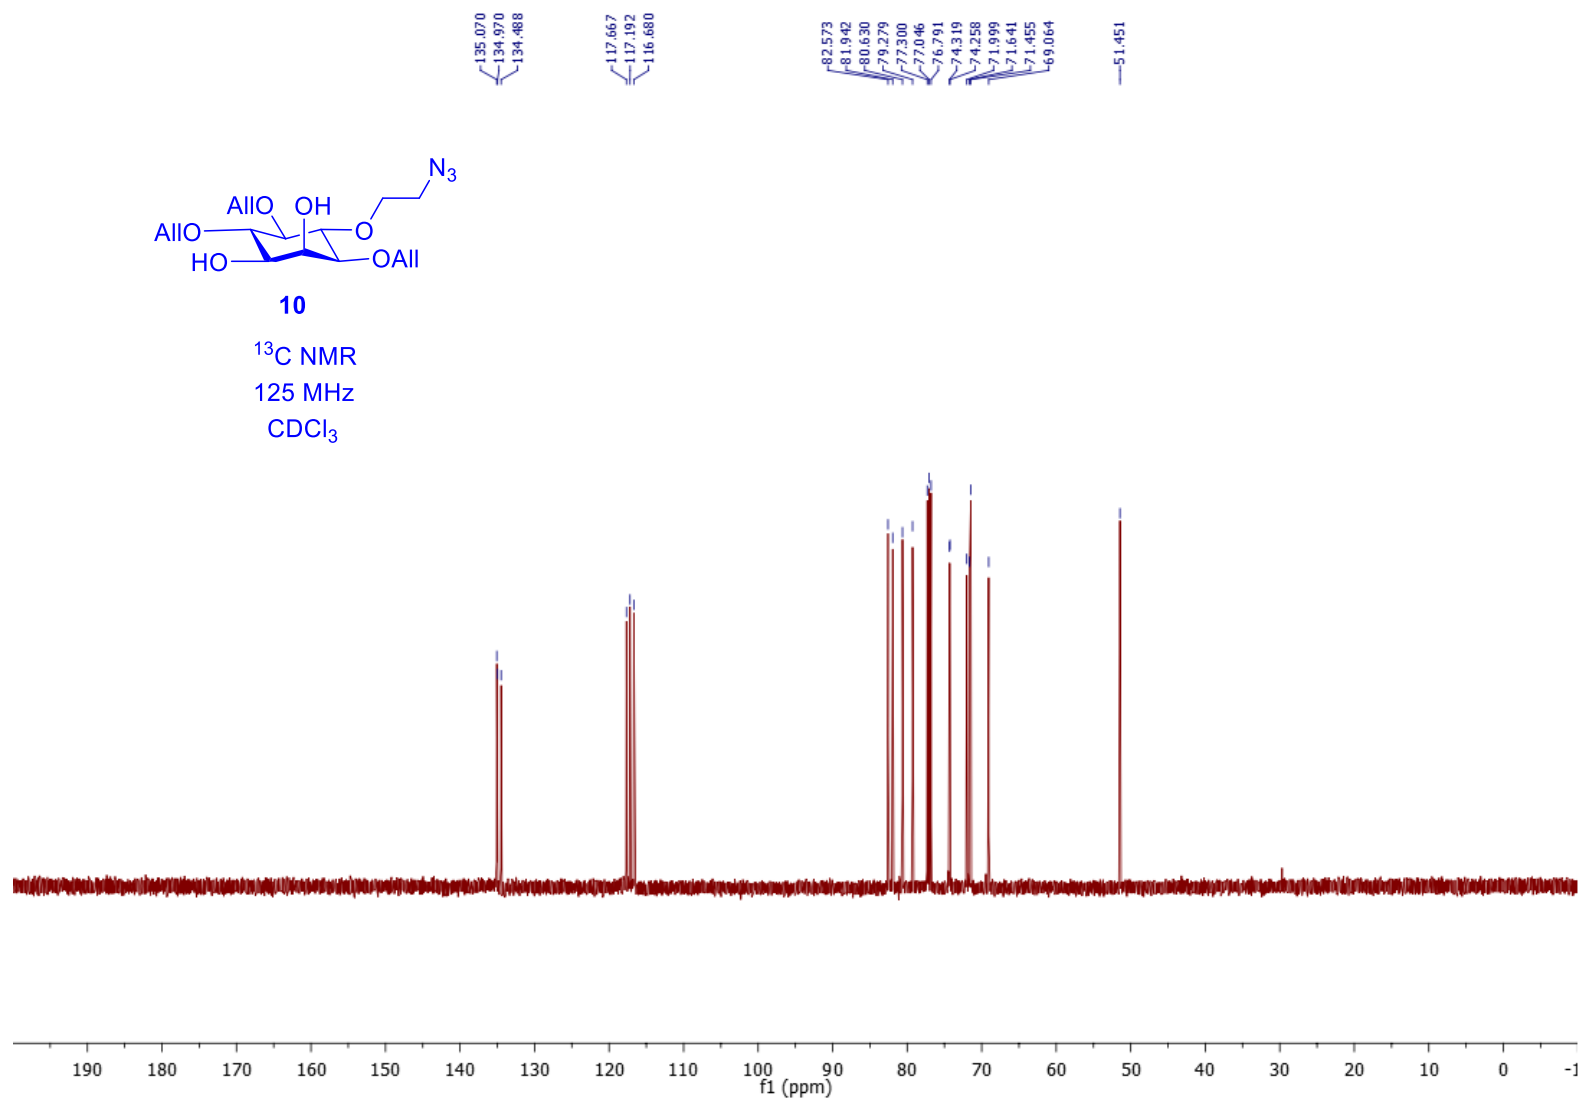

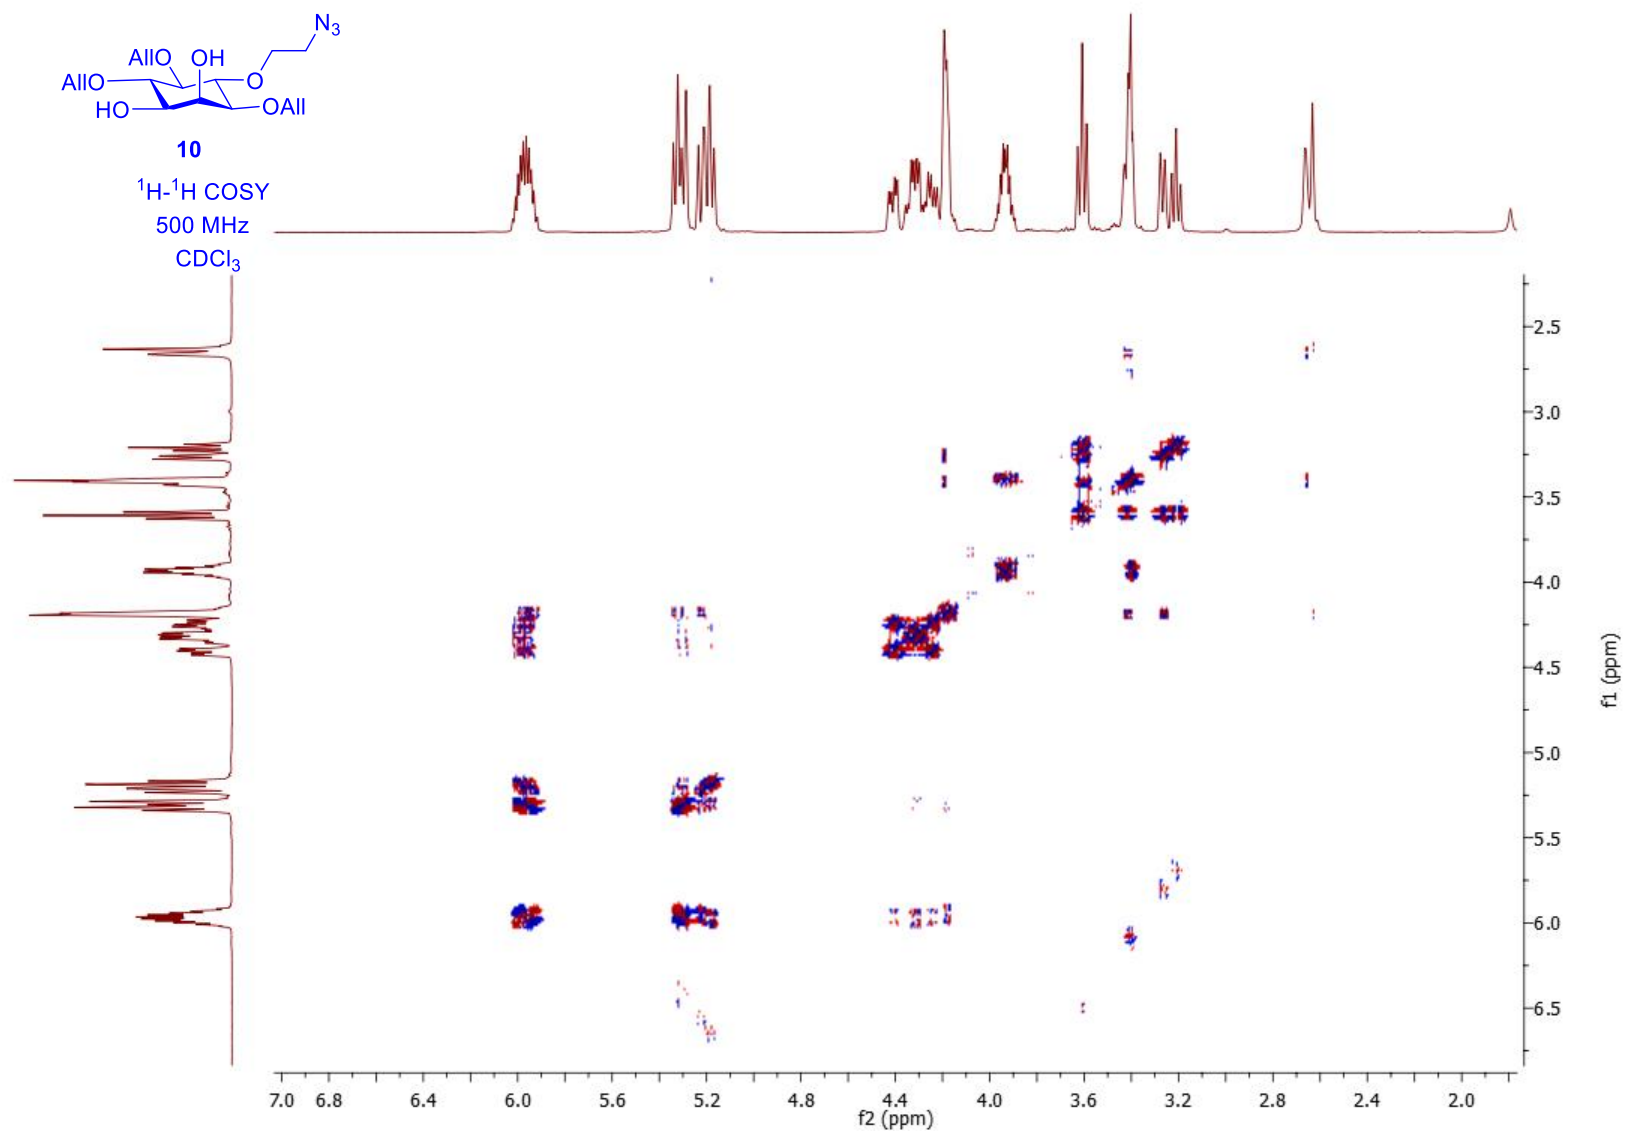

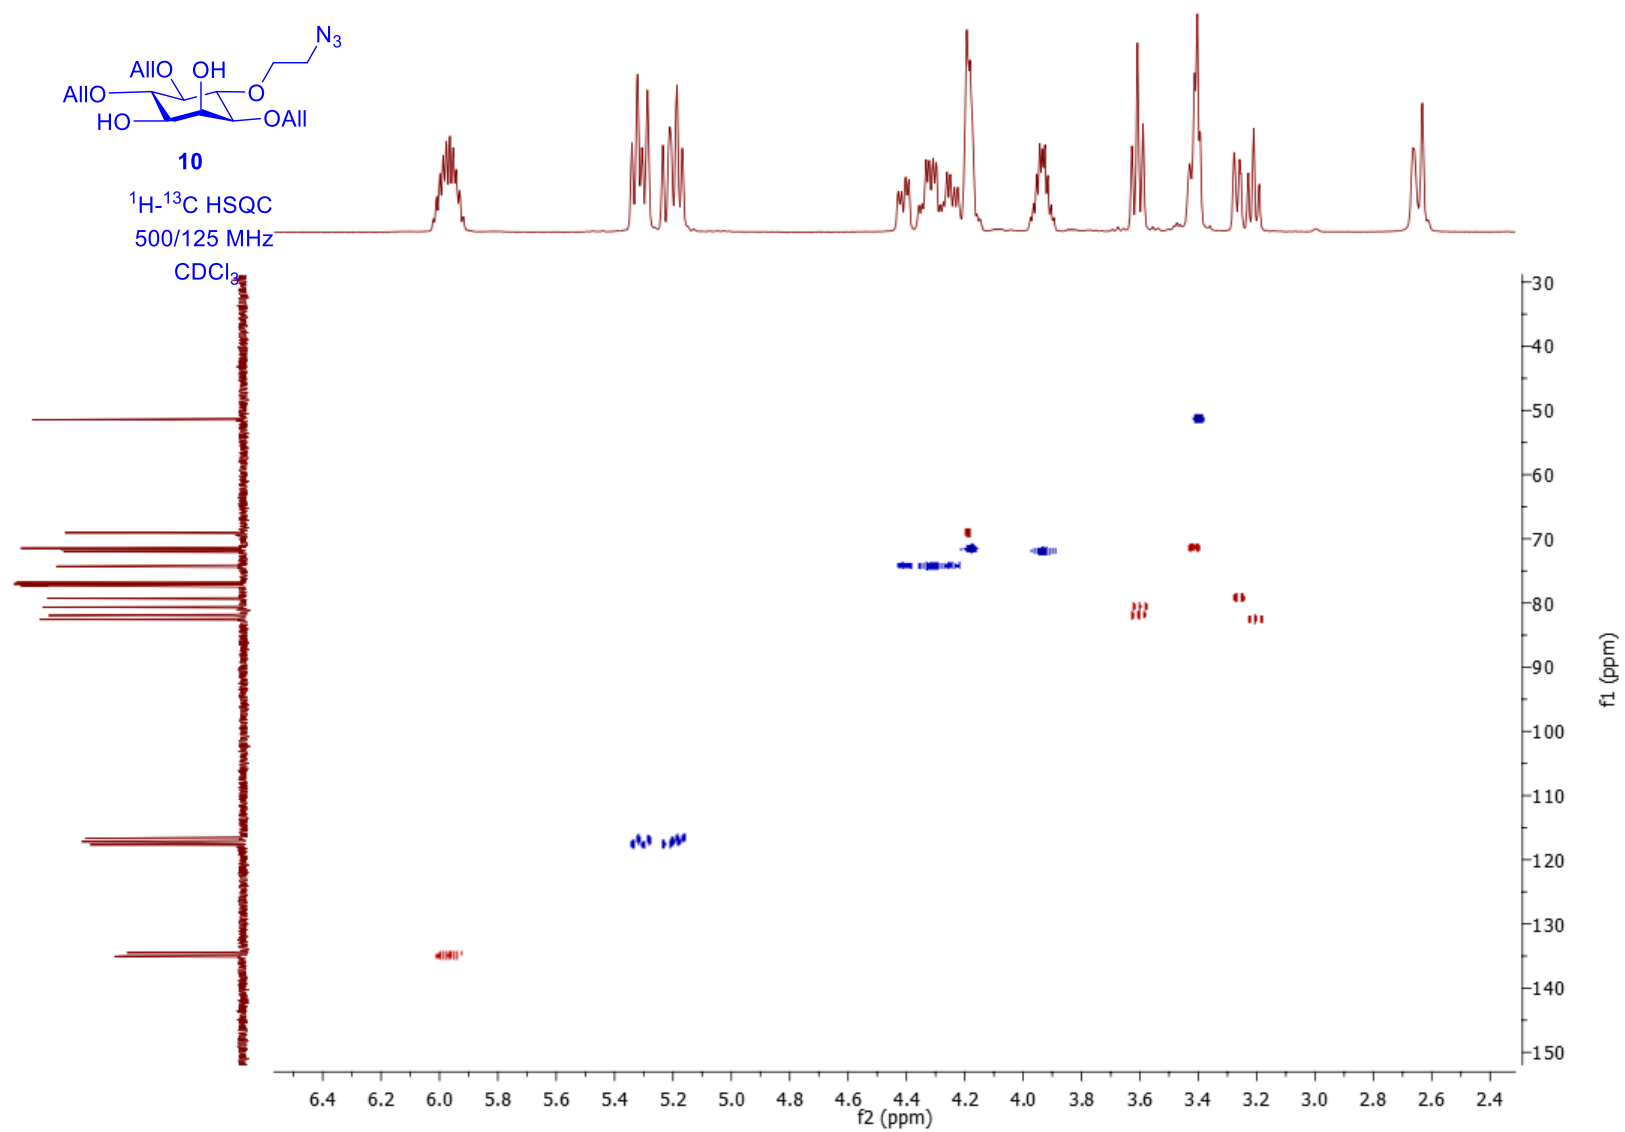

x10<sup>4</sup> +ESI Scan (0.332-0.664 min, 41 Scans) Frag=175.0V 28120\_zsy-2-175\_ESI.d Subtract

Theoretical [M+H]<sup>+</sup> = 370.1973 (0.5 ppm)  
[M+Na]<sup>+</sup> = 392.1792 (2.5 ppm)

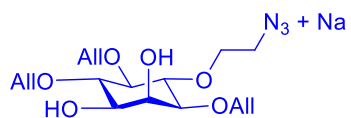

**10**

Chemical Formula: C<sub>17</sub>H<sub>27</sub>N<sub>3</sub>NaO<sub>6</sub><sup>+</sup>

Exact Mass: 392.1792

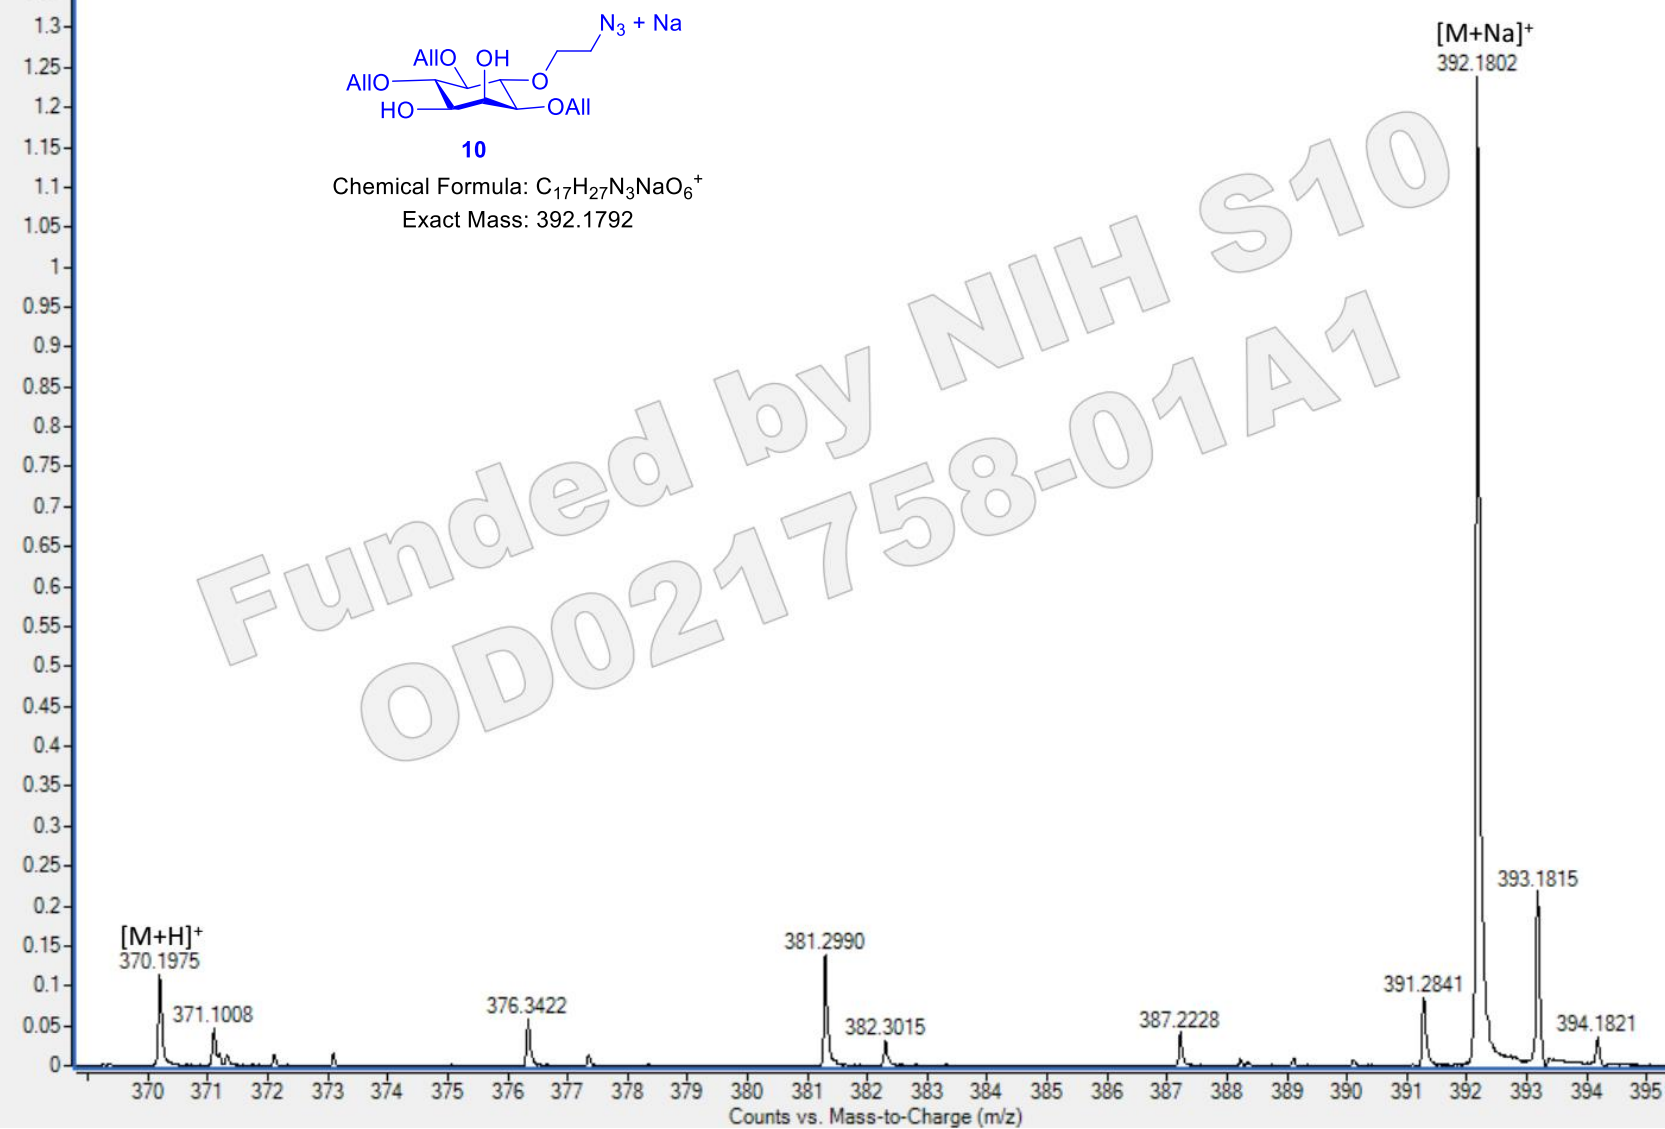

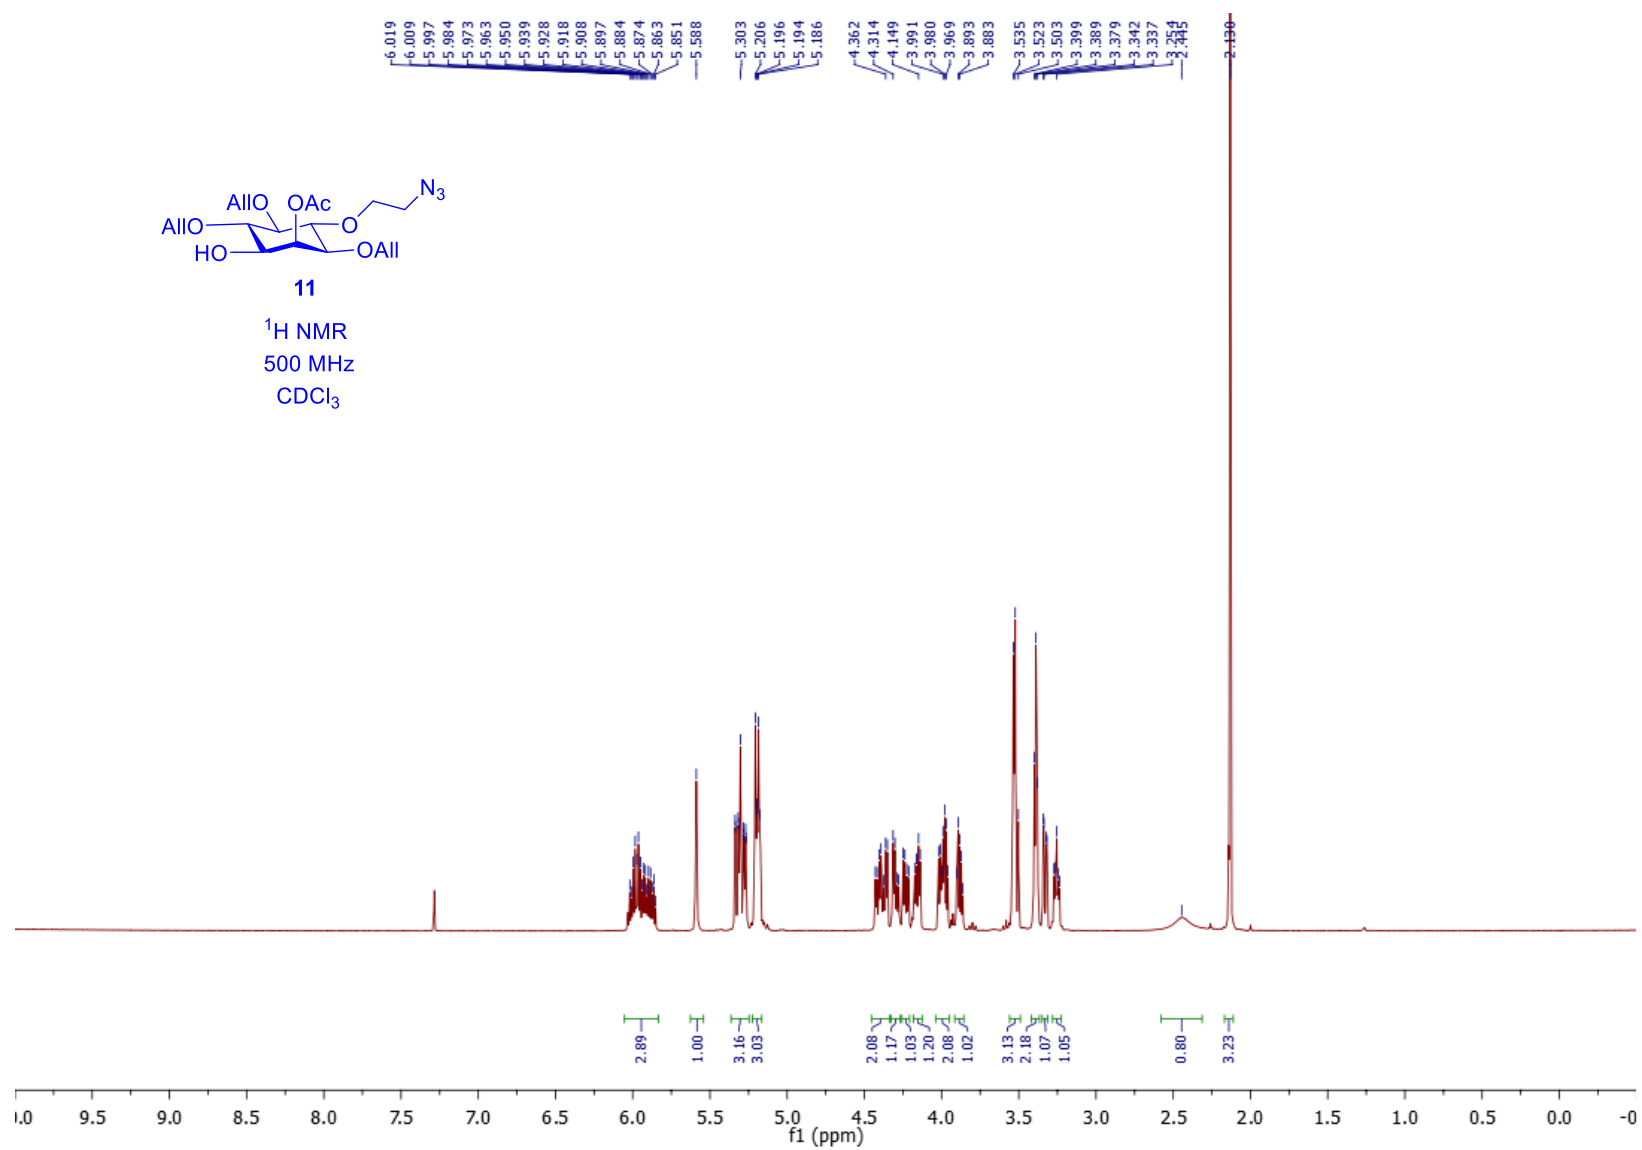



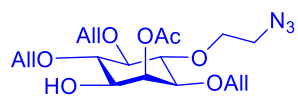

**11**

<sup>13</sup>C NMR

125 MHz

CDCl<sub>3</sub>

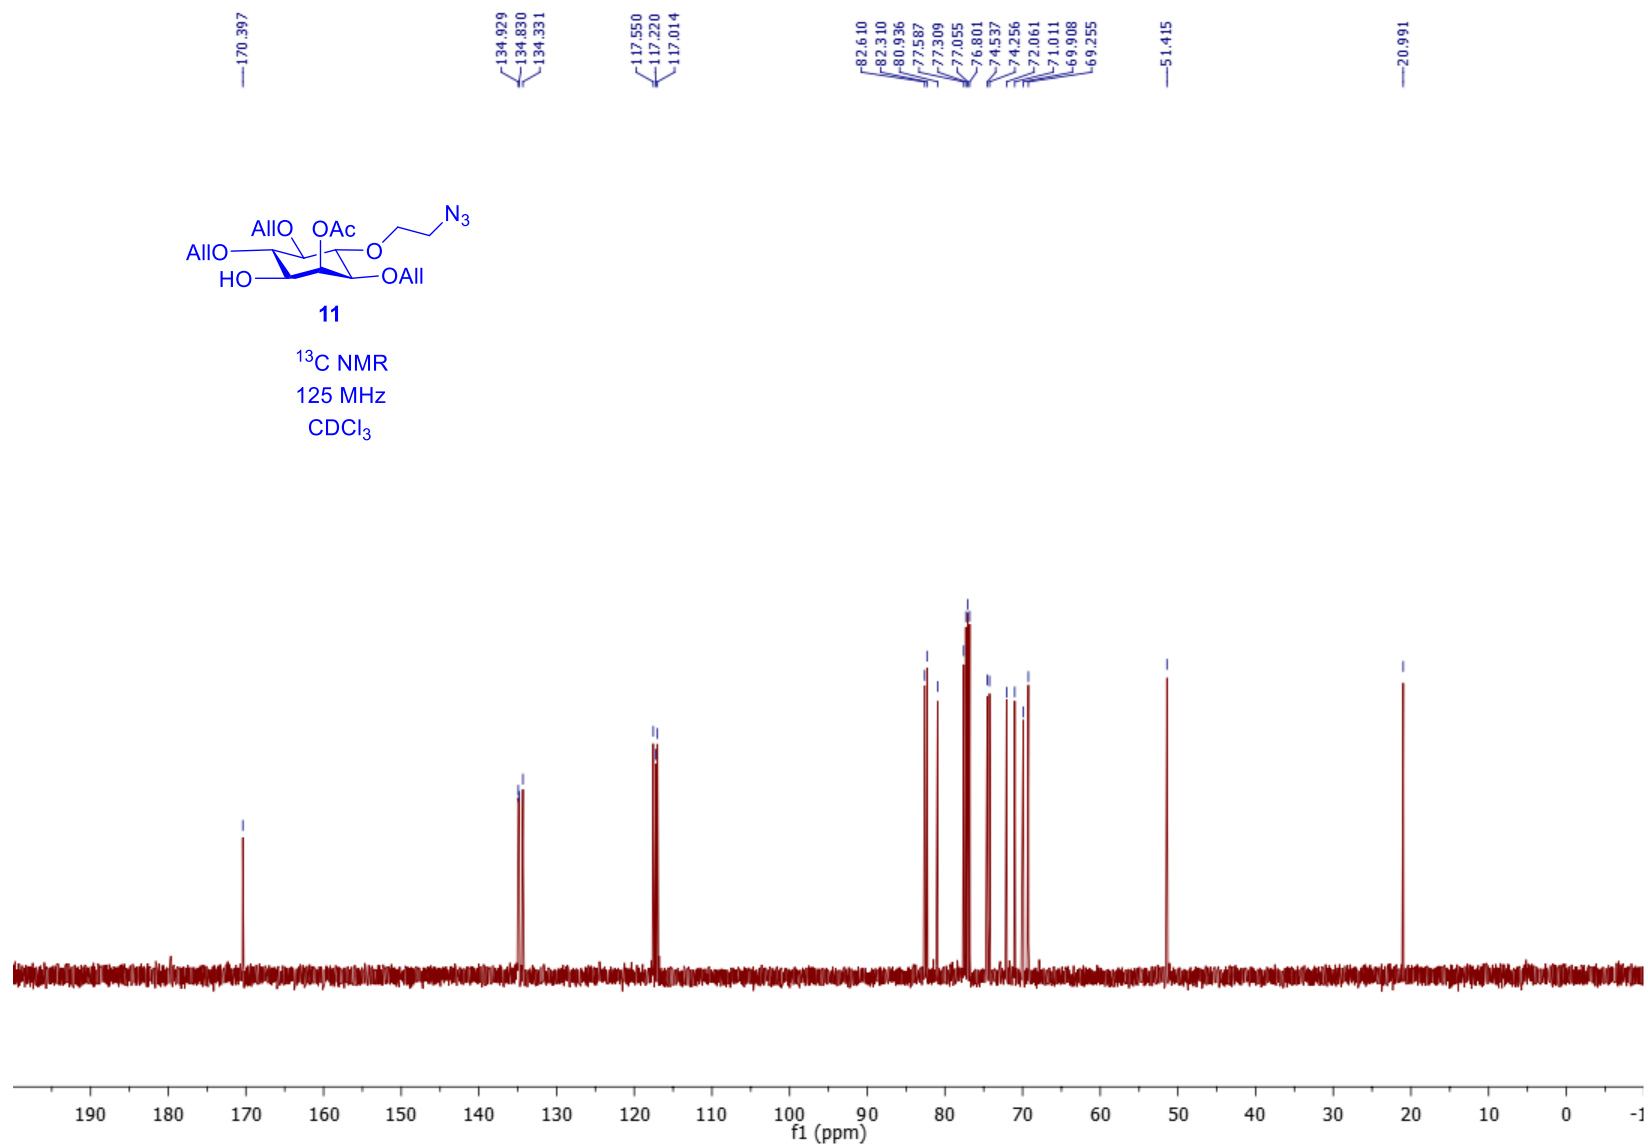

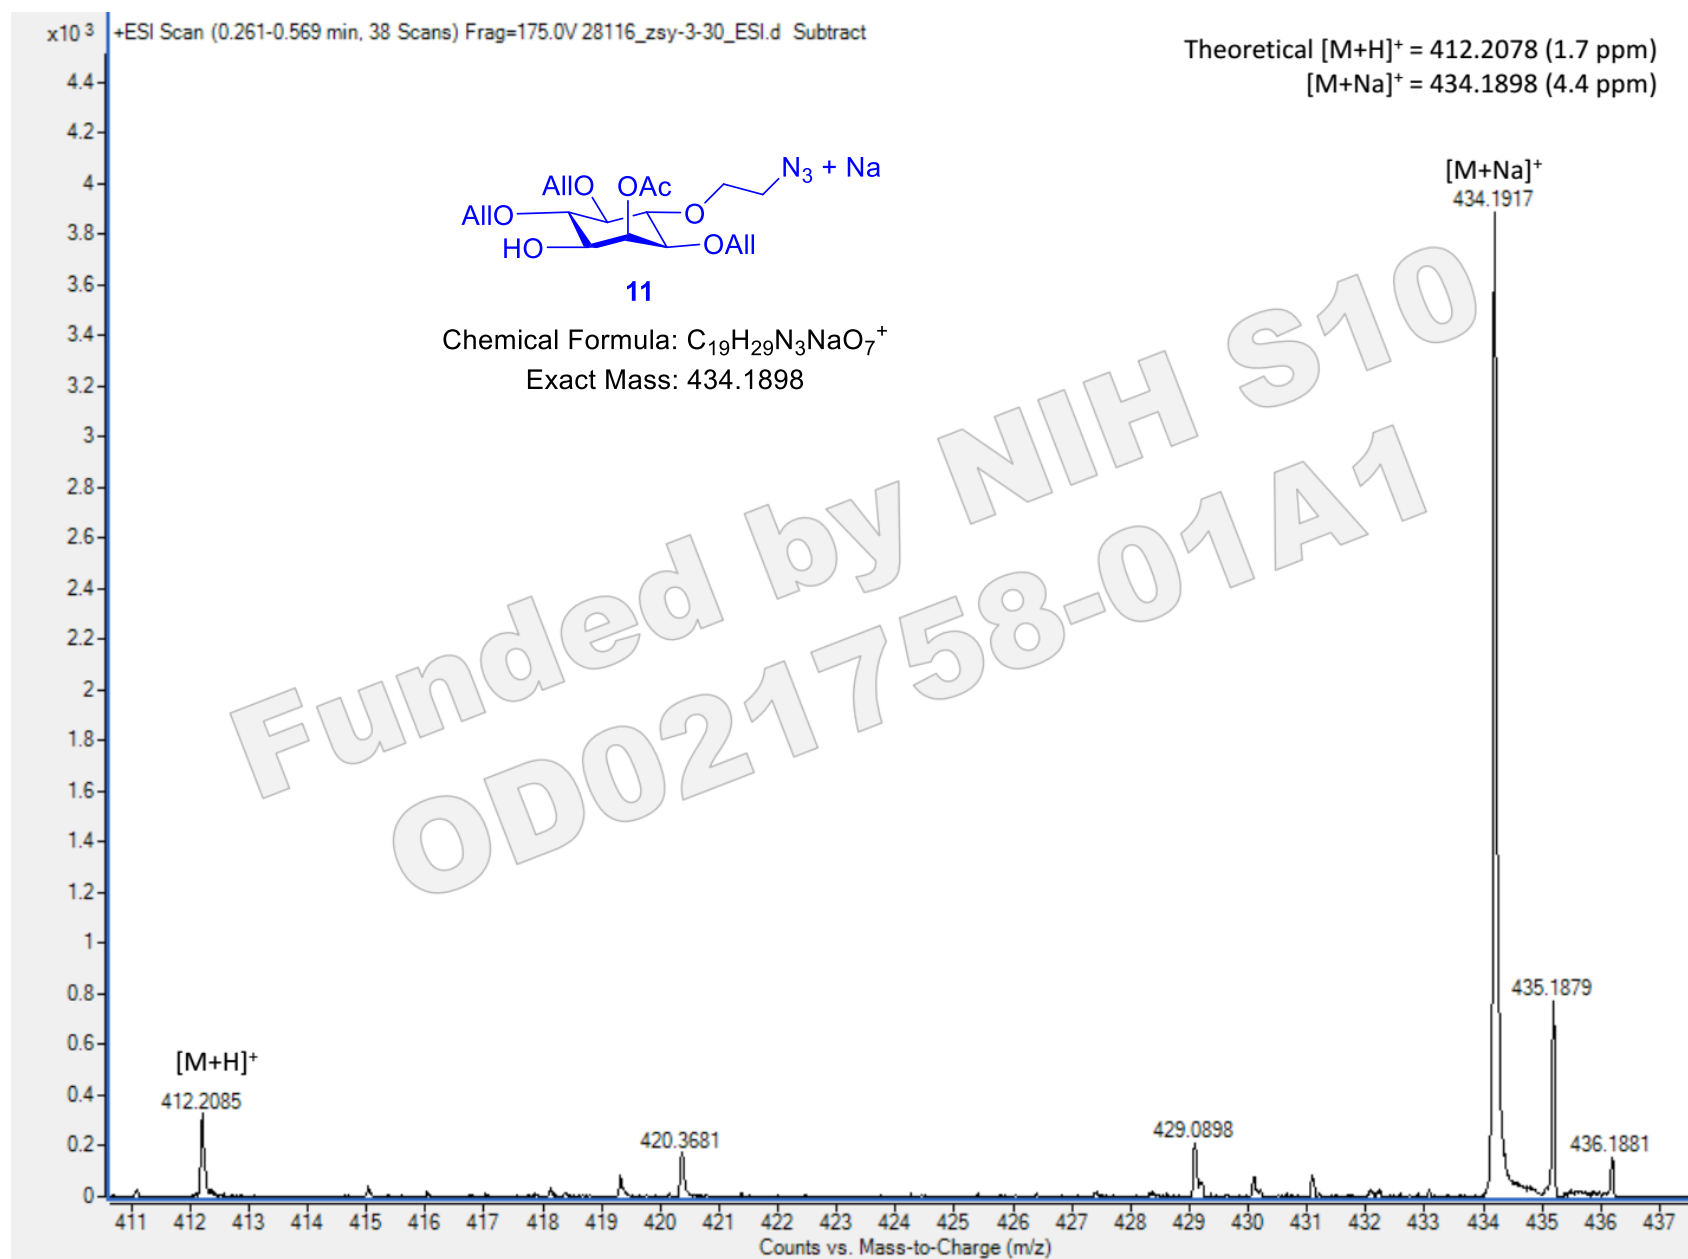



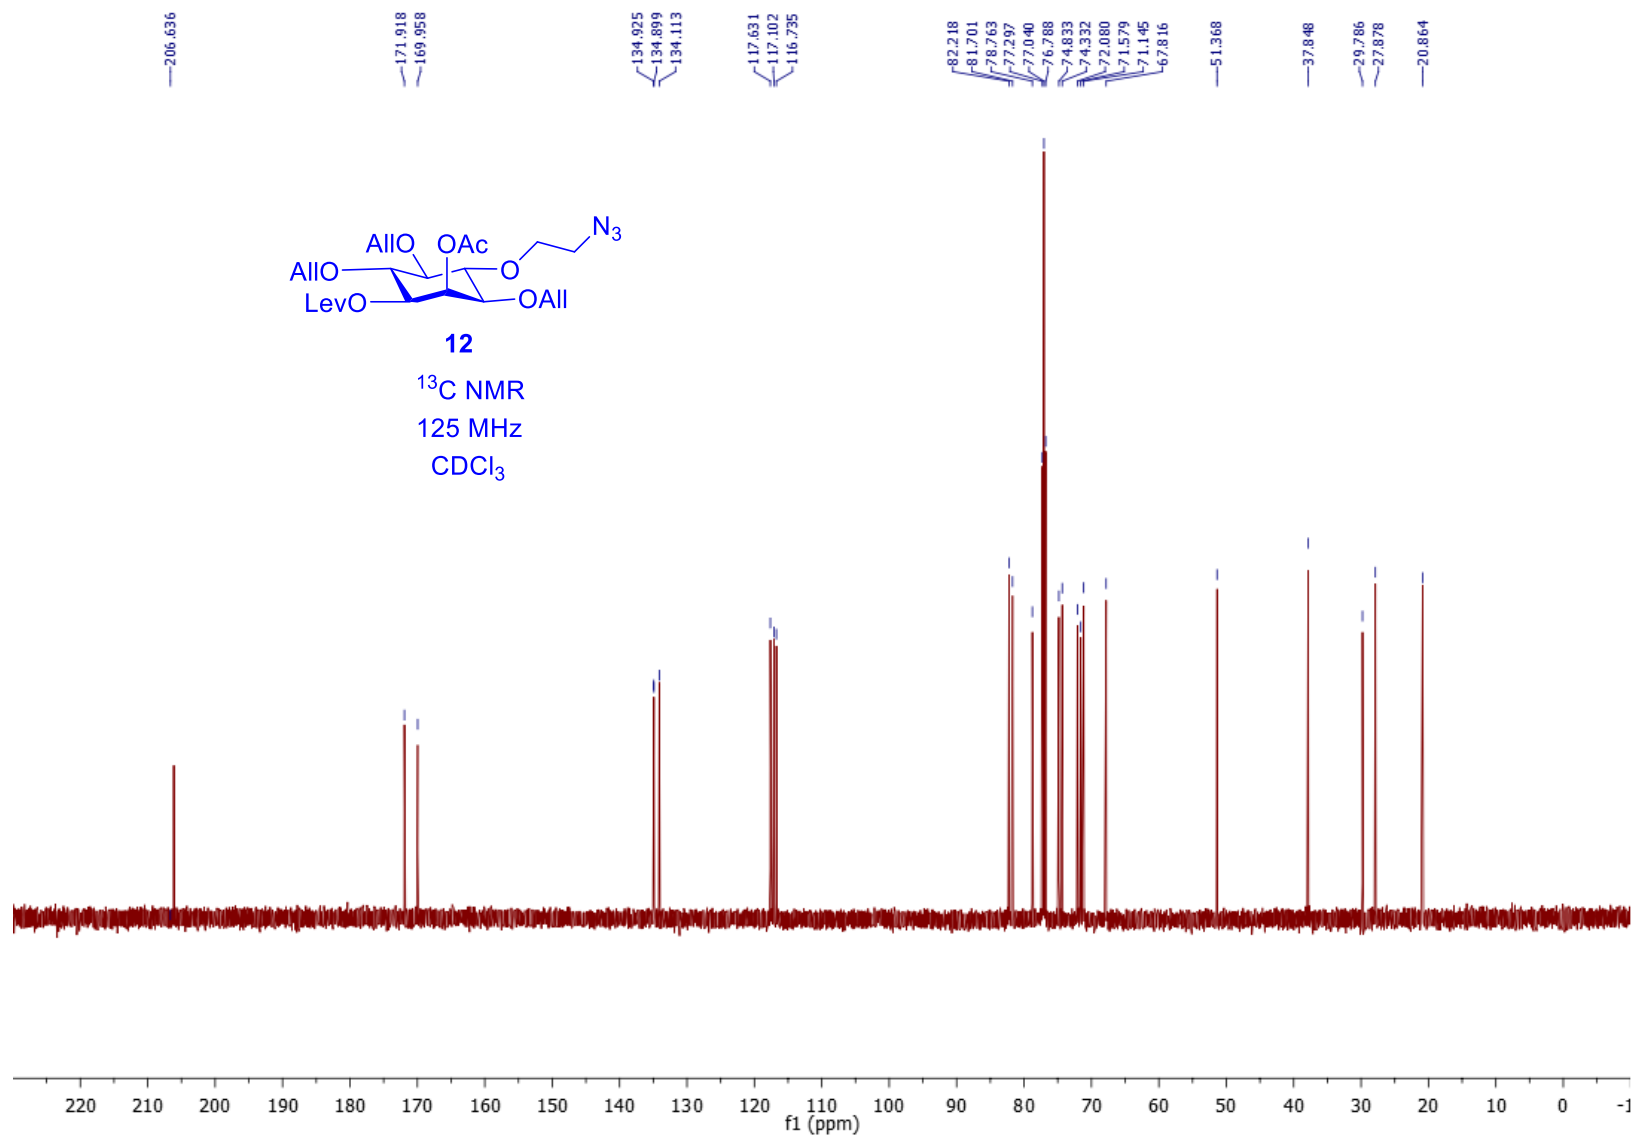

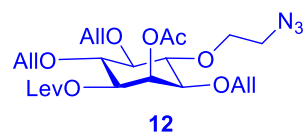

12

 $^1\text{H}$ - $^1\text{H}$  COSY

500 MHz

 $\text{CDCl}_3$ 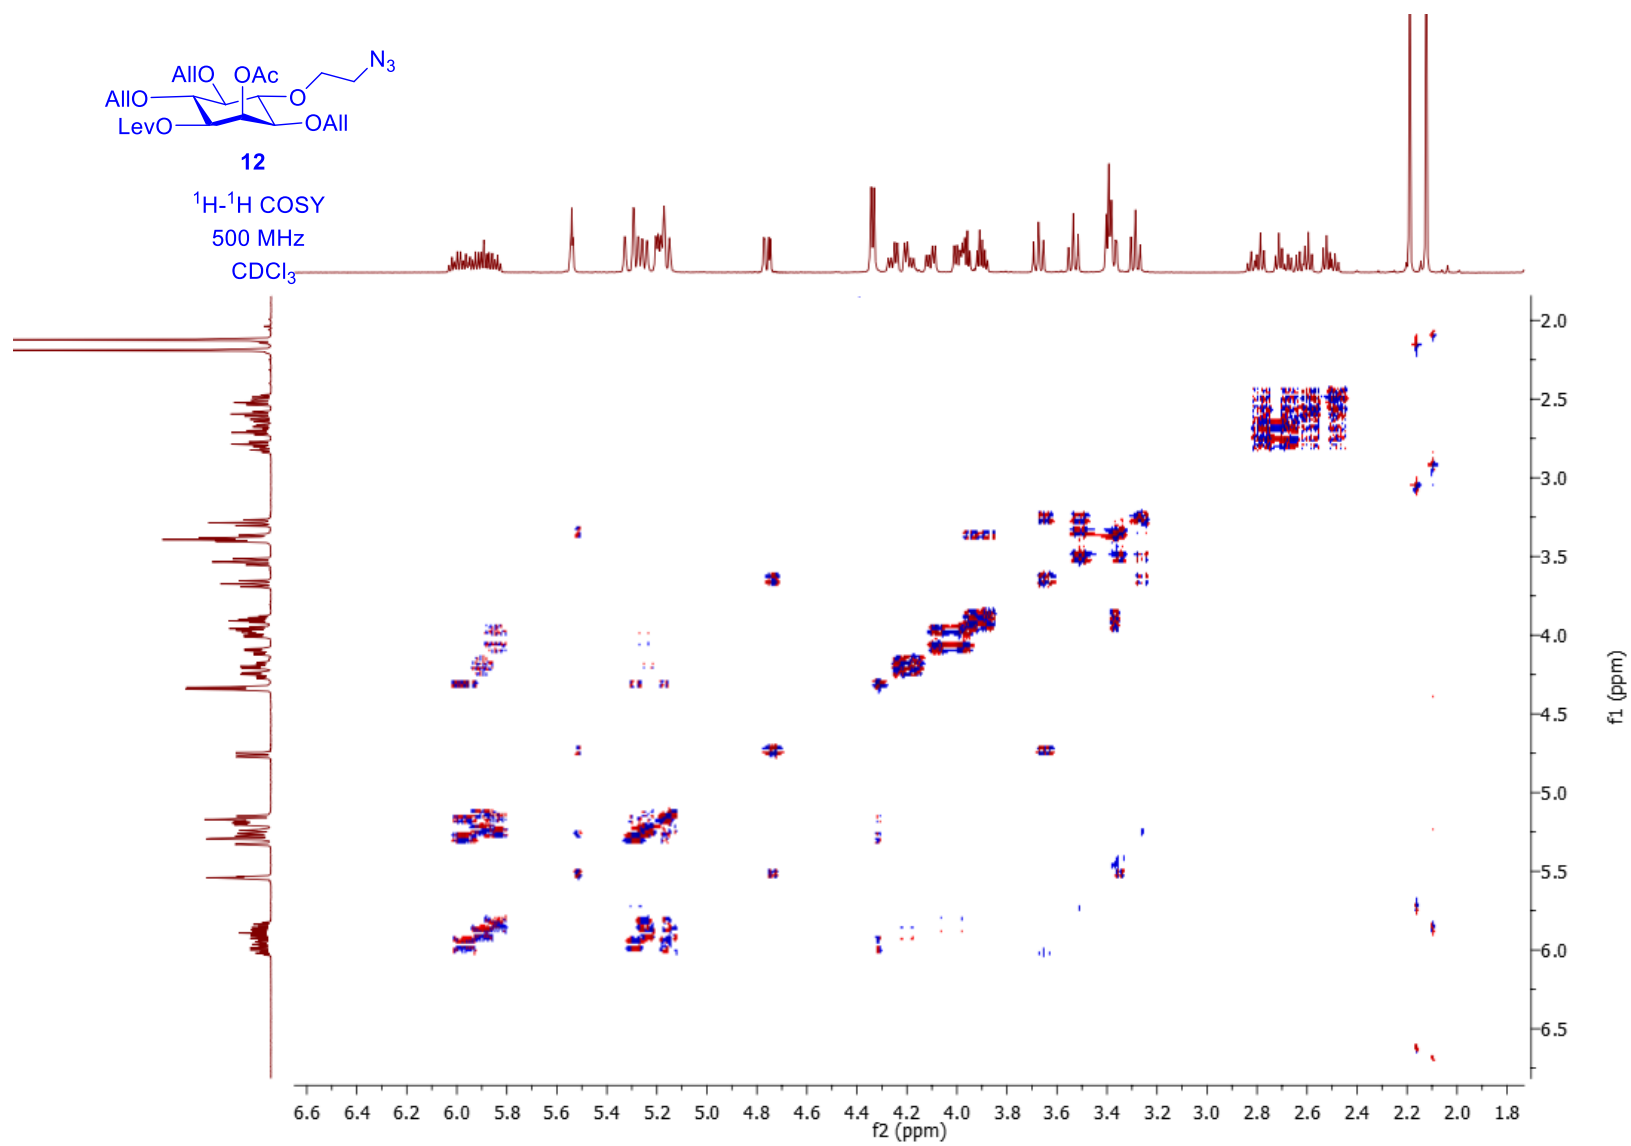

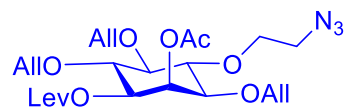

**12**  
<sup>1</sup>H-<sup>13</sup>C HSQC  
 500/125 MHz  
 CDCl<sub>3</sub>

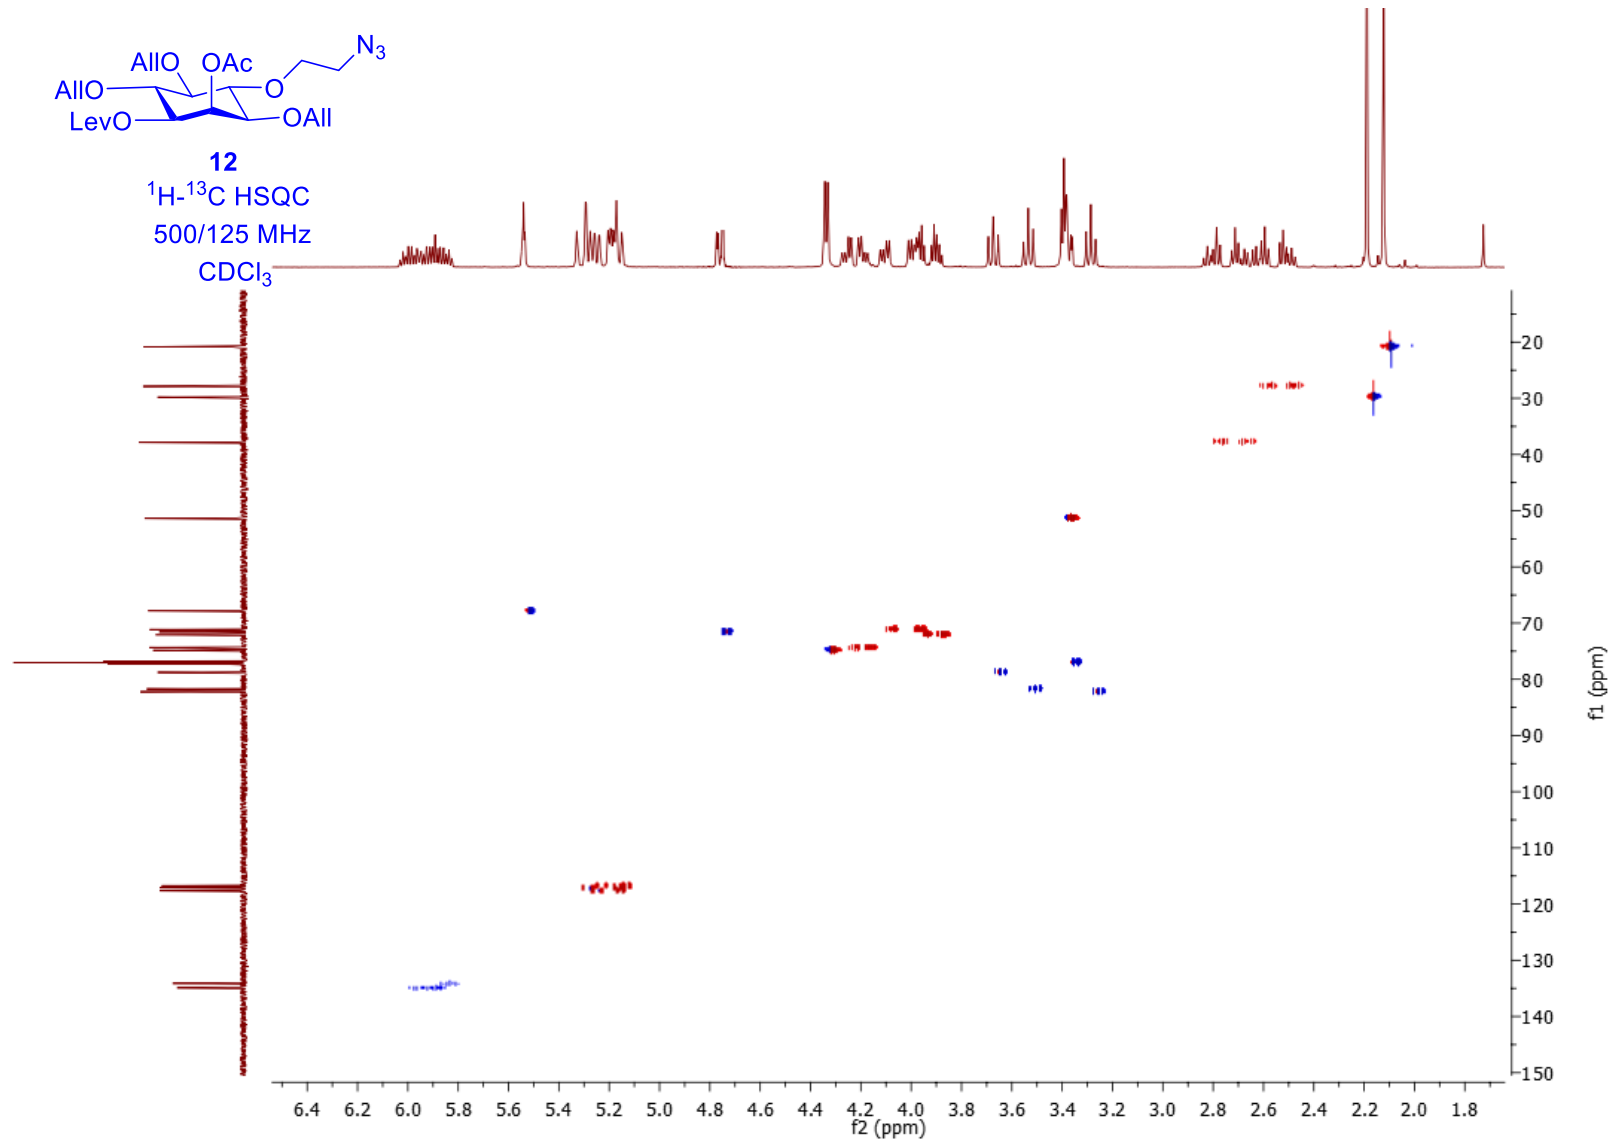

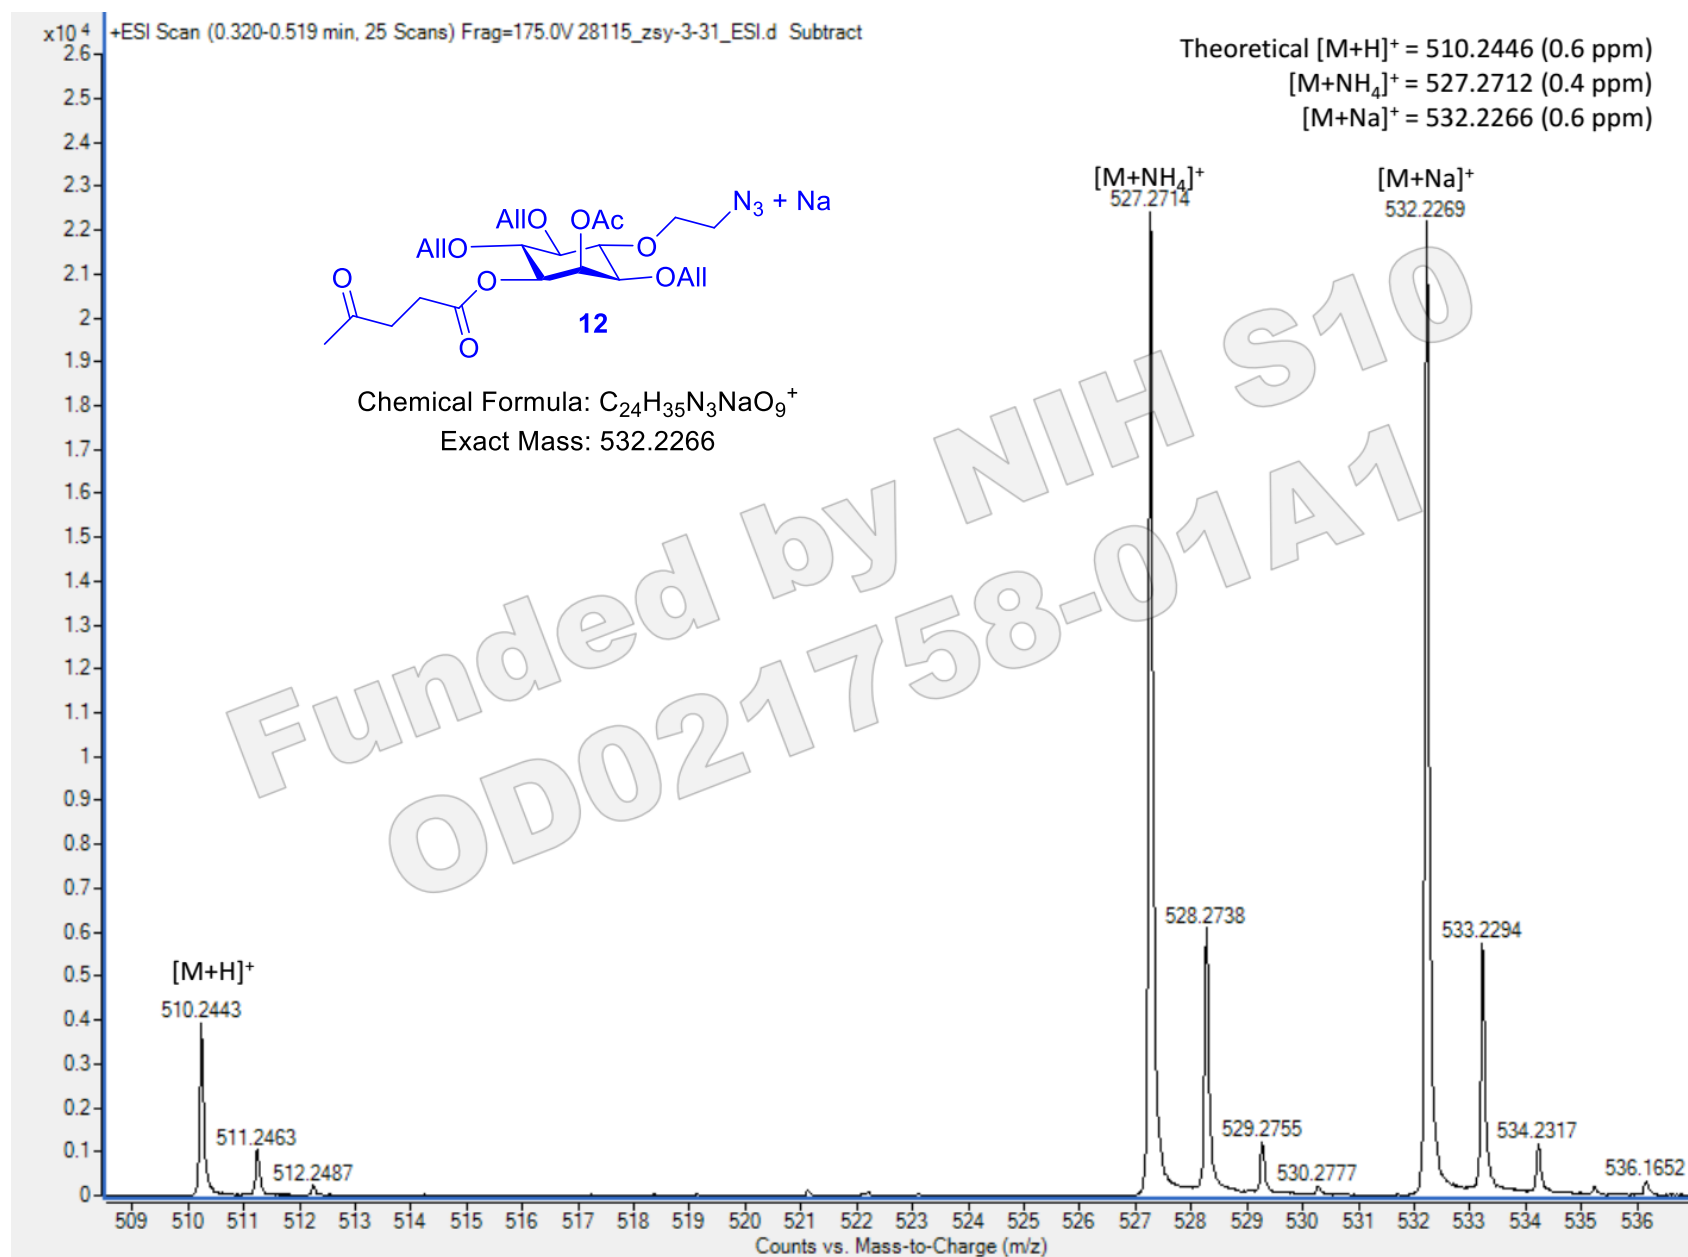

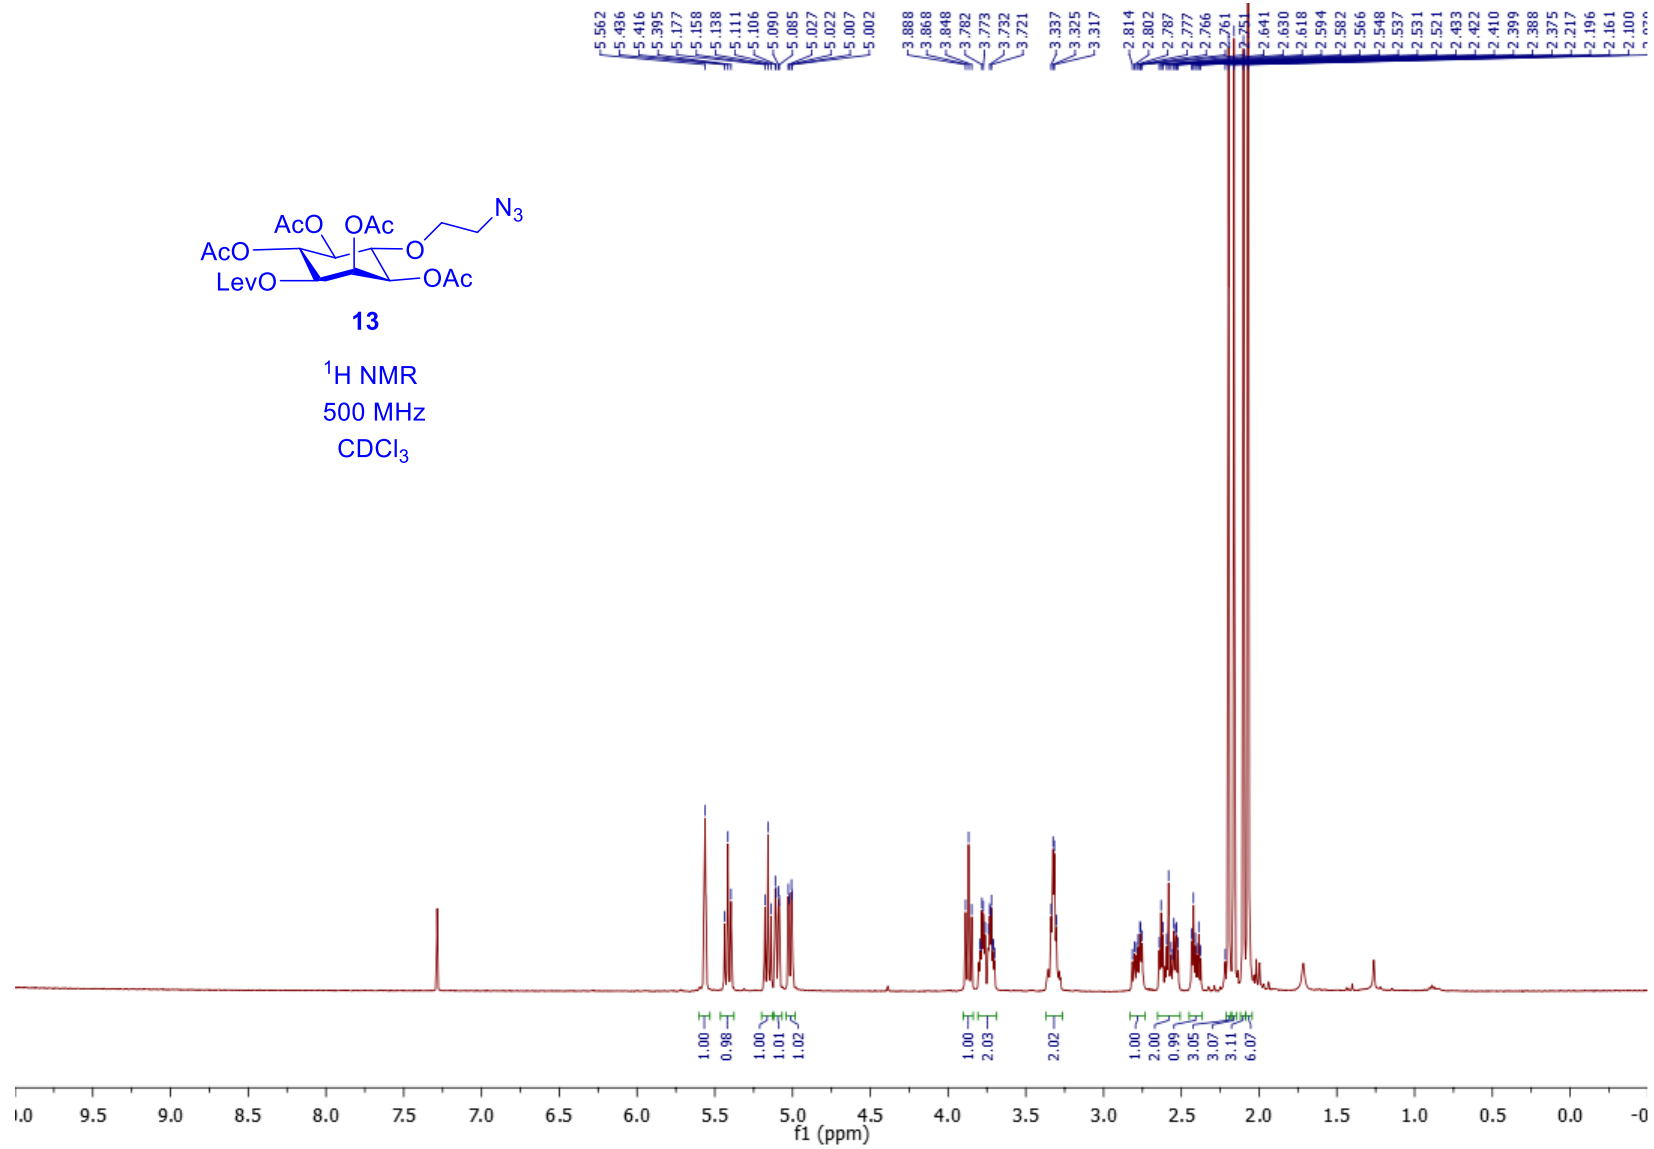



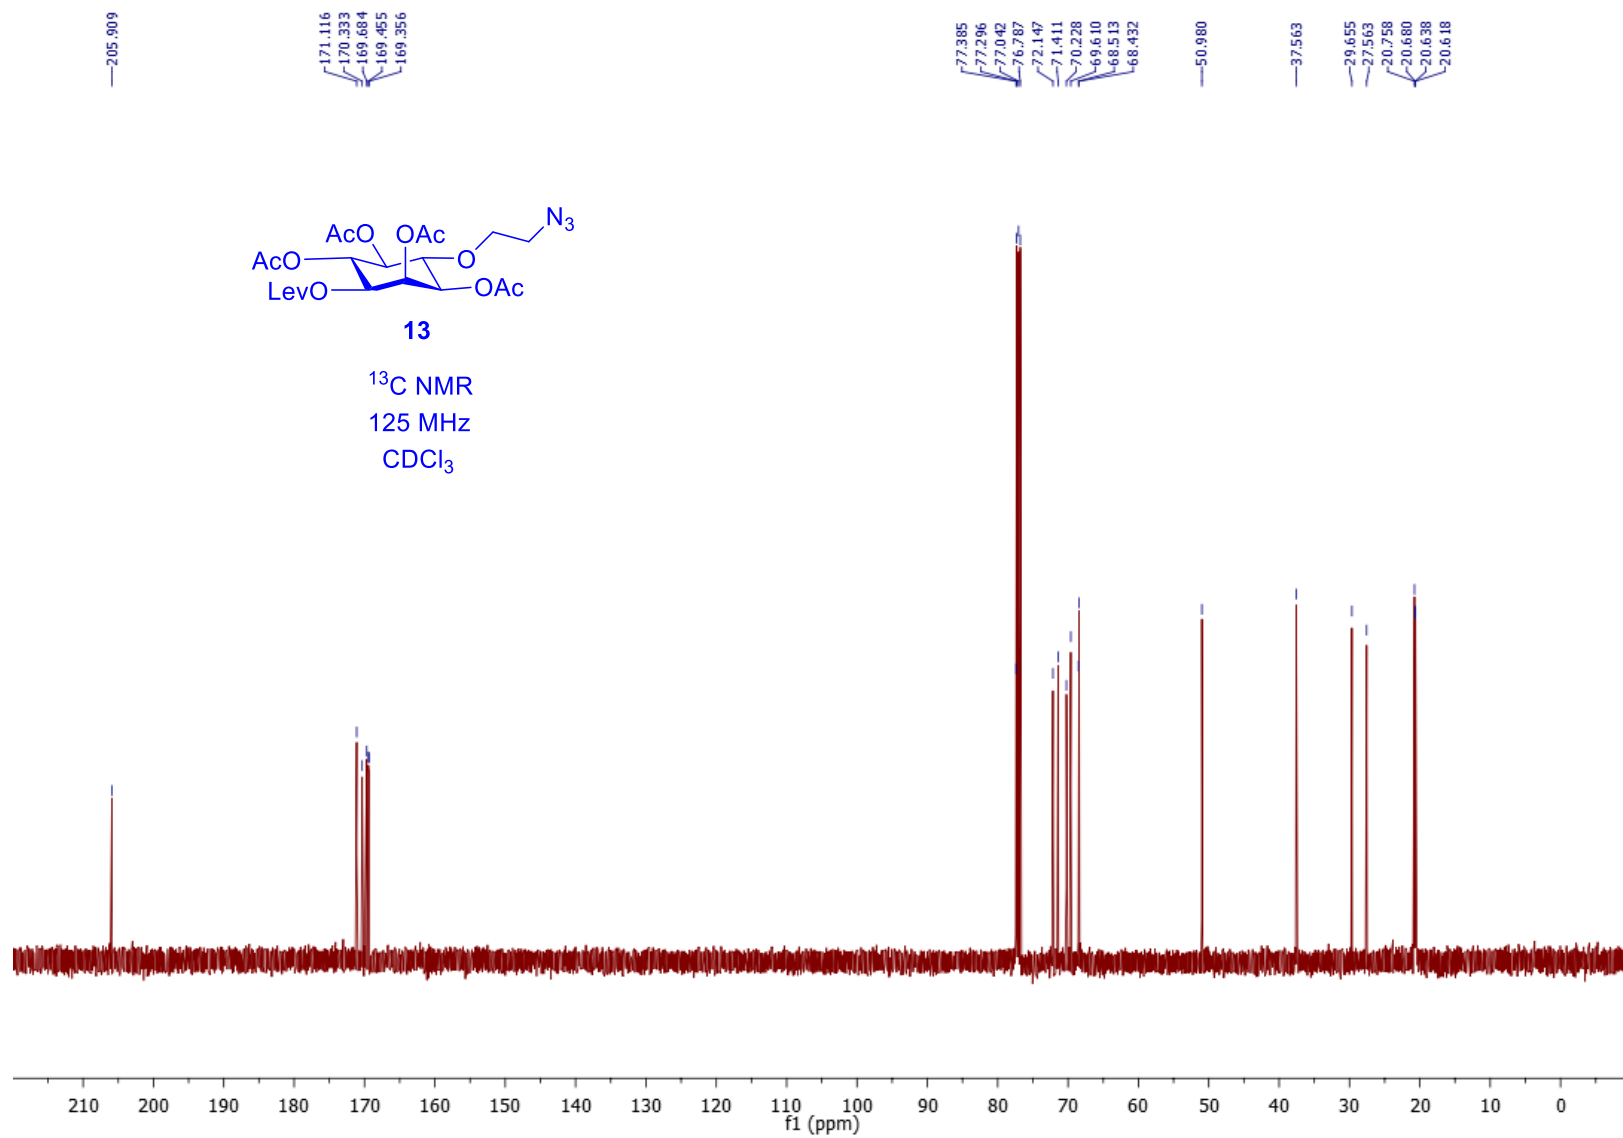

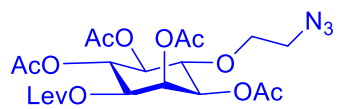

**13**

$^1\text{H}$ - $^1\text{H}$  COSY

500 MHz

$\text{CDCl}_3$

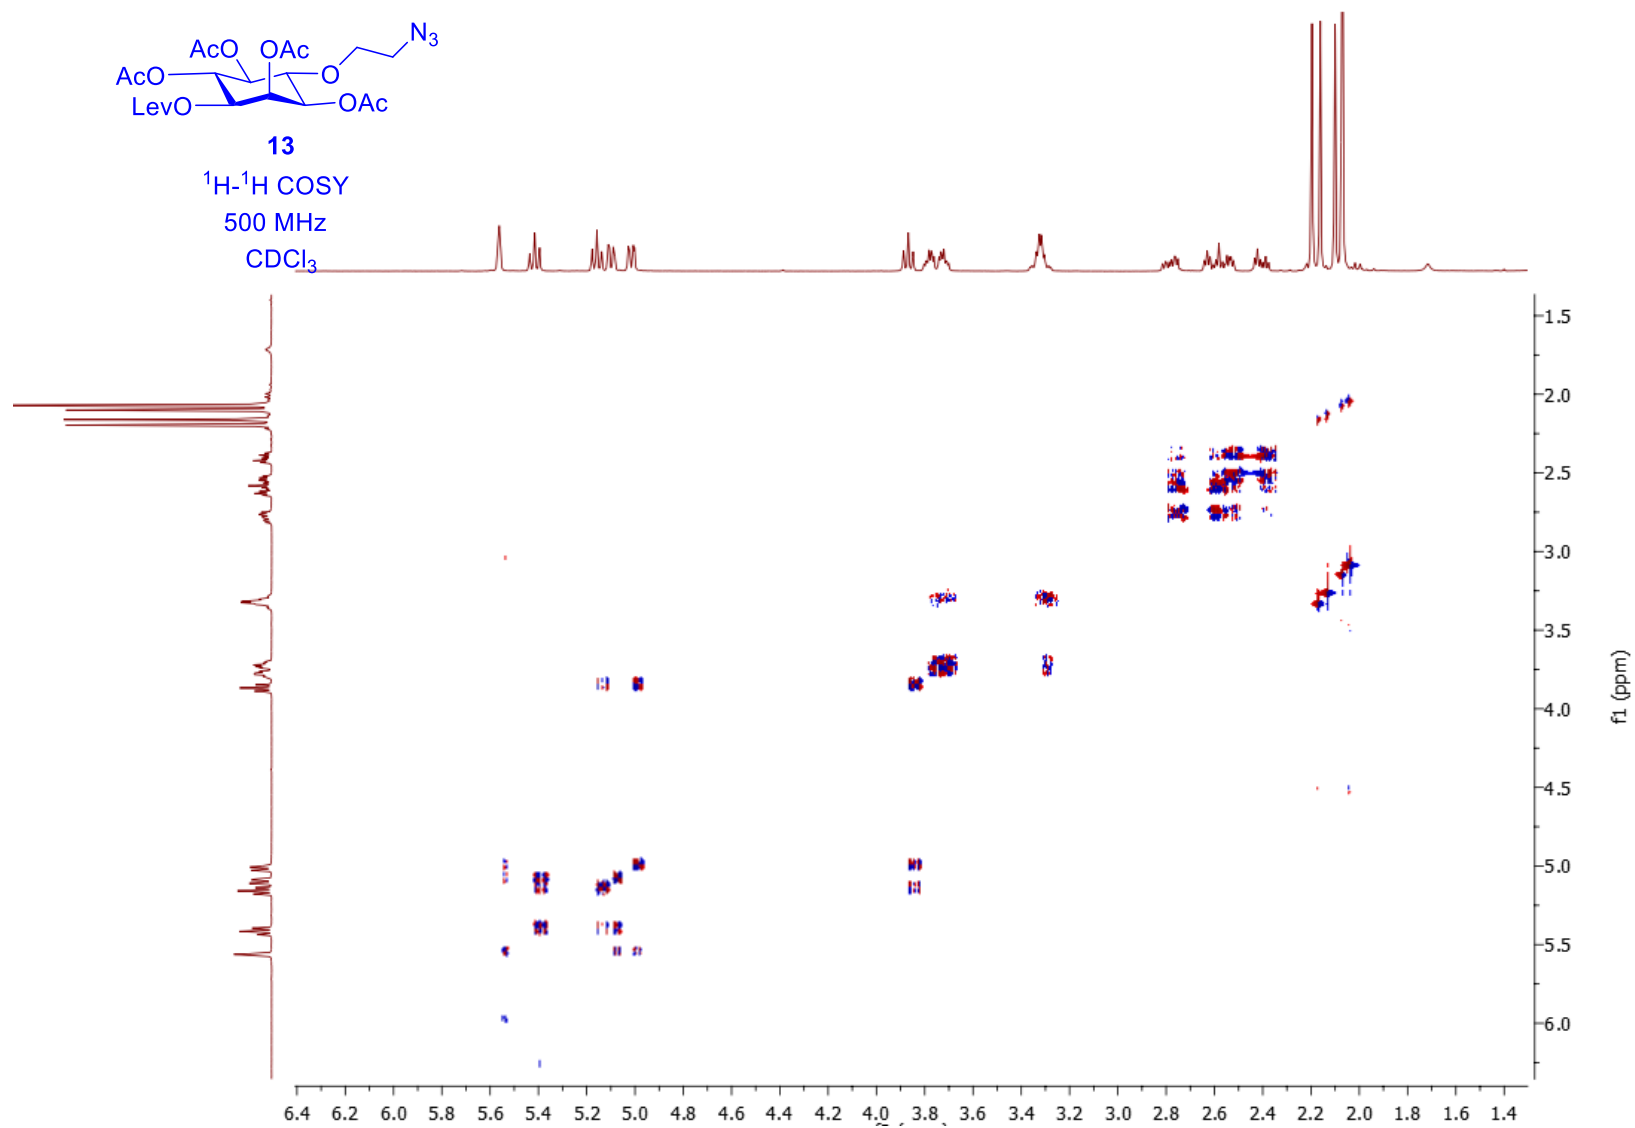

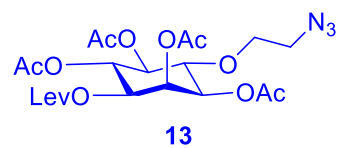

$^1\text{H}$ - $^{13}\text{C}$  HSQC  
 500/125 MHz  
 $\text{CDCl}_3$

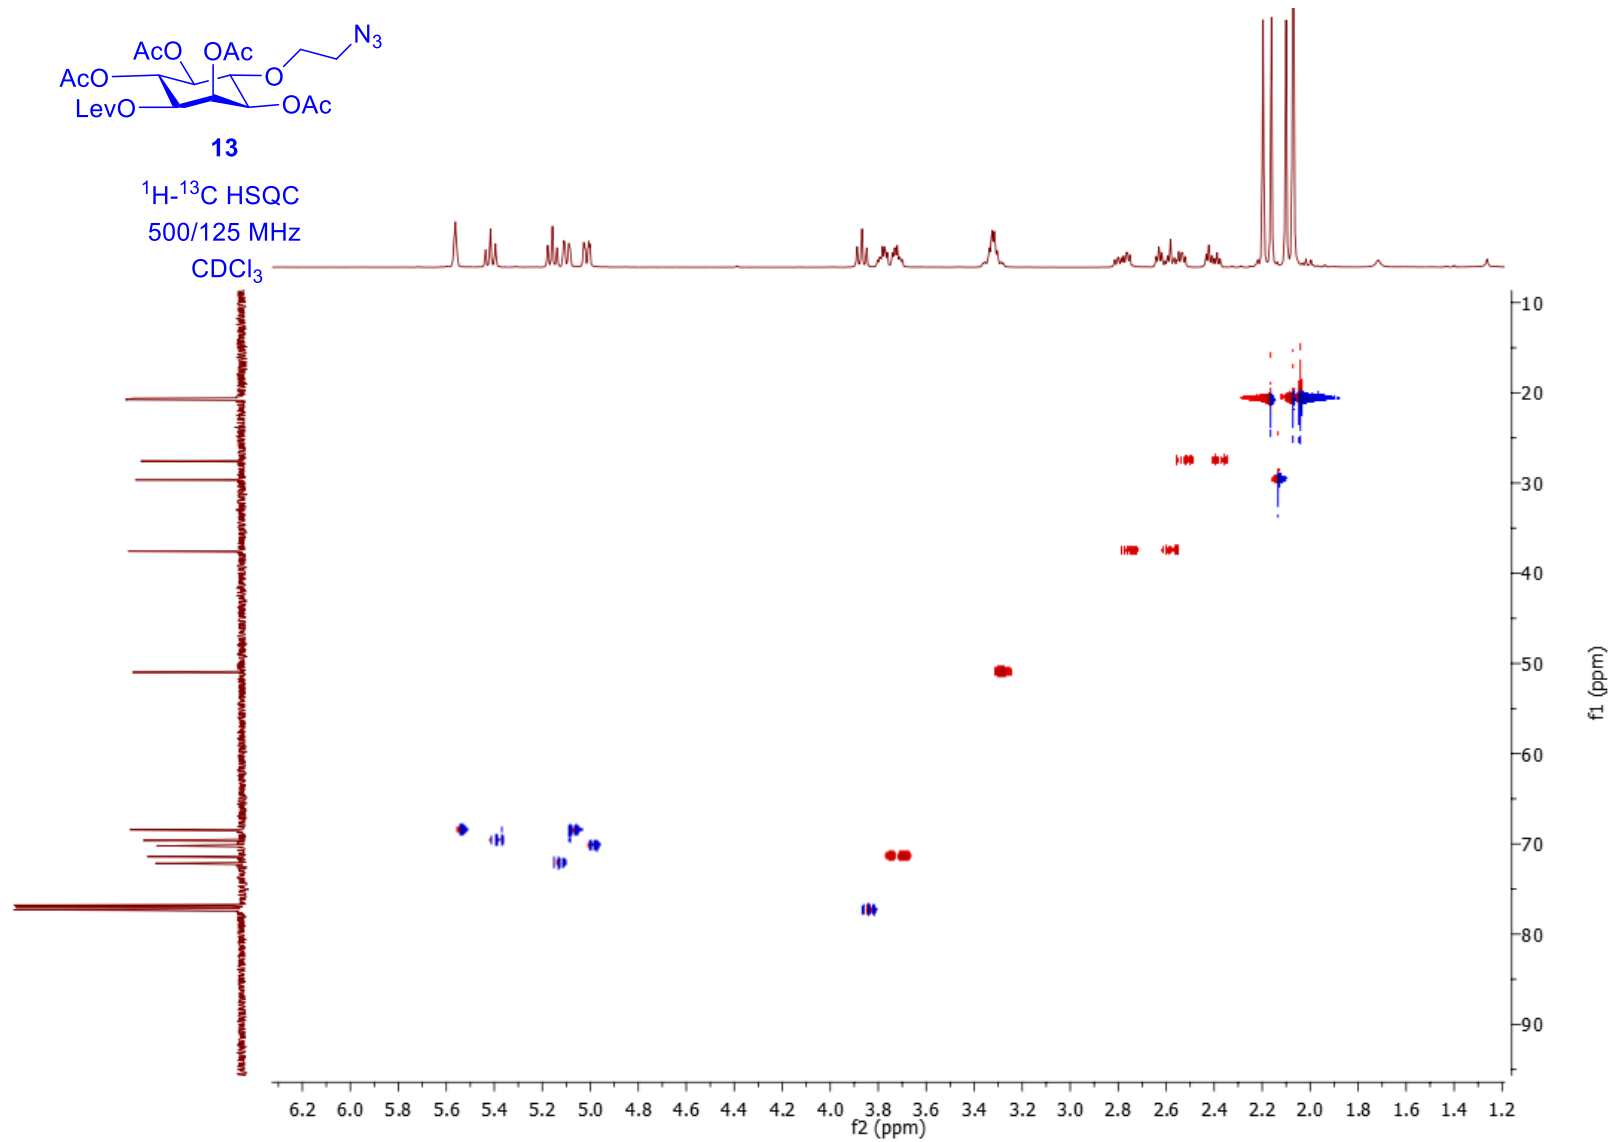

x10<sup>4</sup> +ESI Scan (0.282-0.673 min, 48 Scans) Frag=175.0V 28145\_zsy-3-33\_ESI.d Subtract

Theoretical  $[M+NH_4]^+ = 533.2089$  (1.7 ppm)

$[M+Na]^+ = 538.1643$  (2.8 ppm)

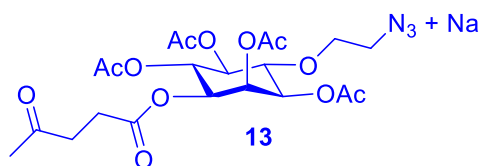

Chemical Formula: C<sub>21</sub>H<sub>29</sub>N<sub>3</sub>NaO<sub>12</sub><sup>+</sup>

Exact Mass: 538.1643

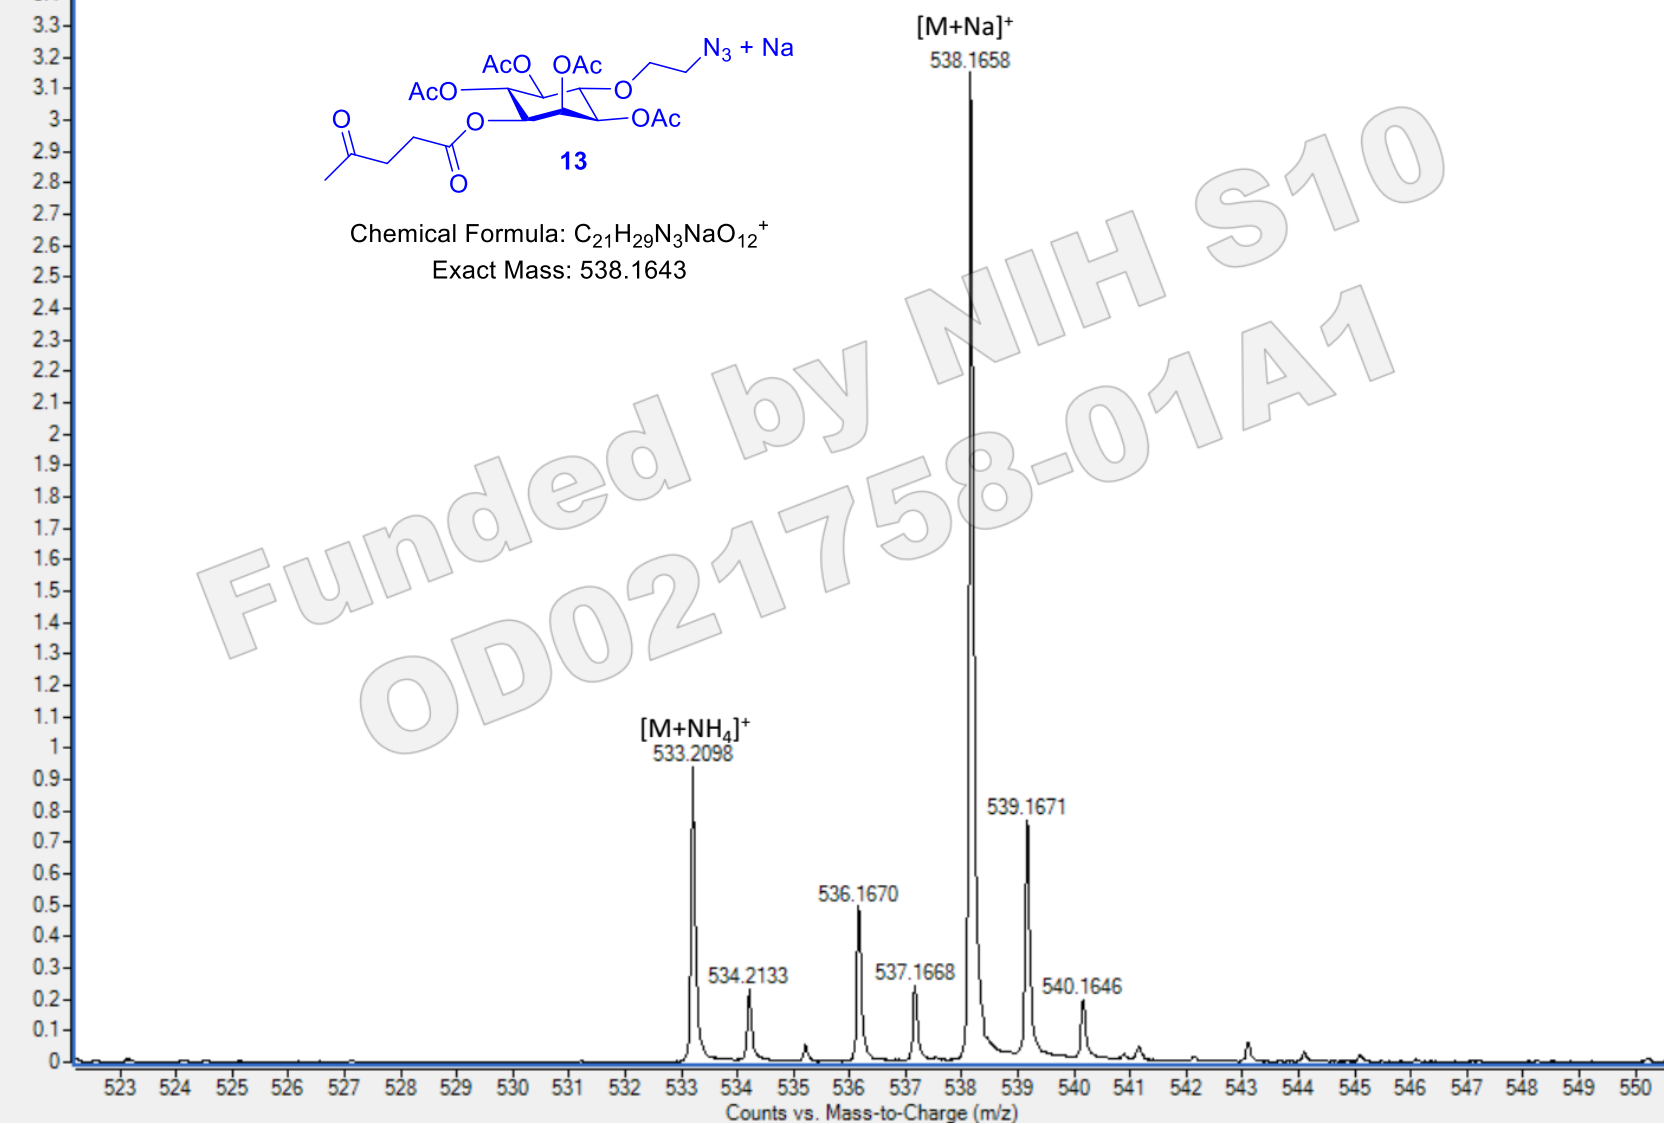

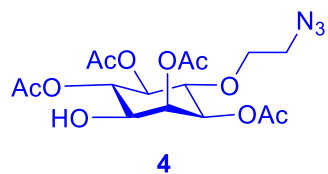

<sup>1</sup>H NMR  
 500 MHz  
 CDCl<sub>3</sub>

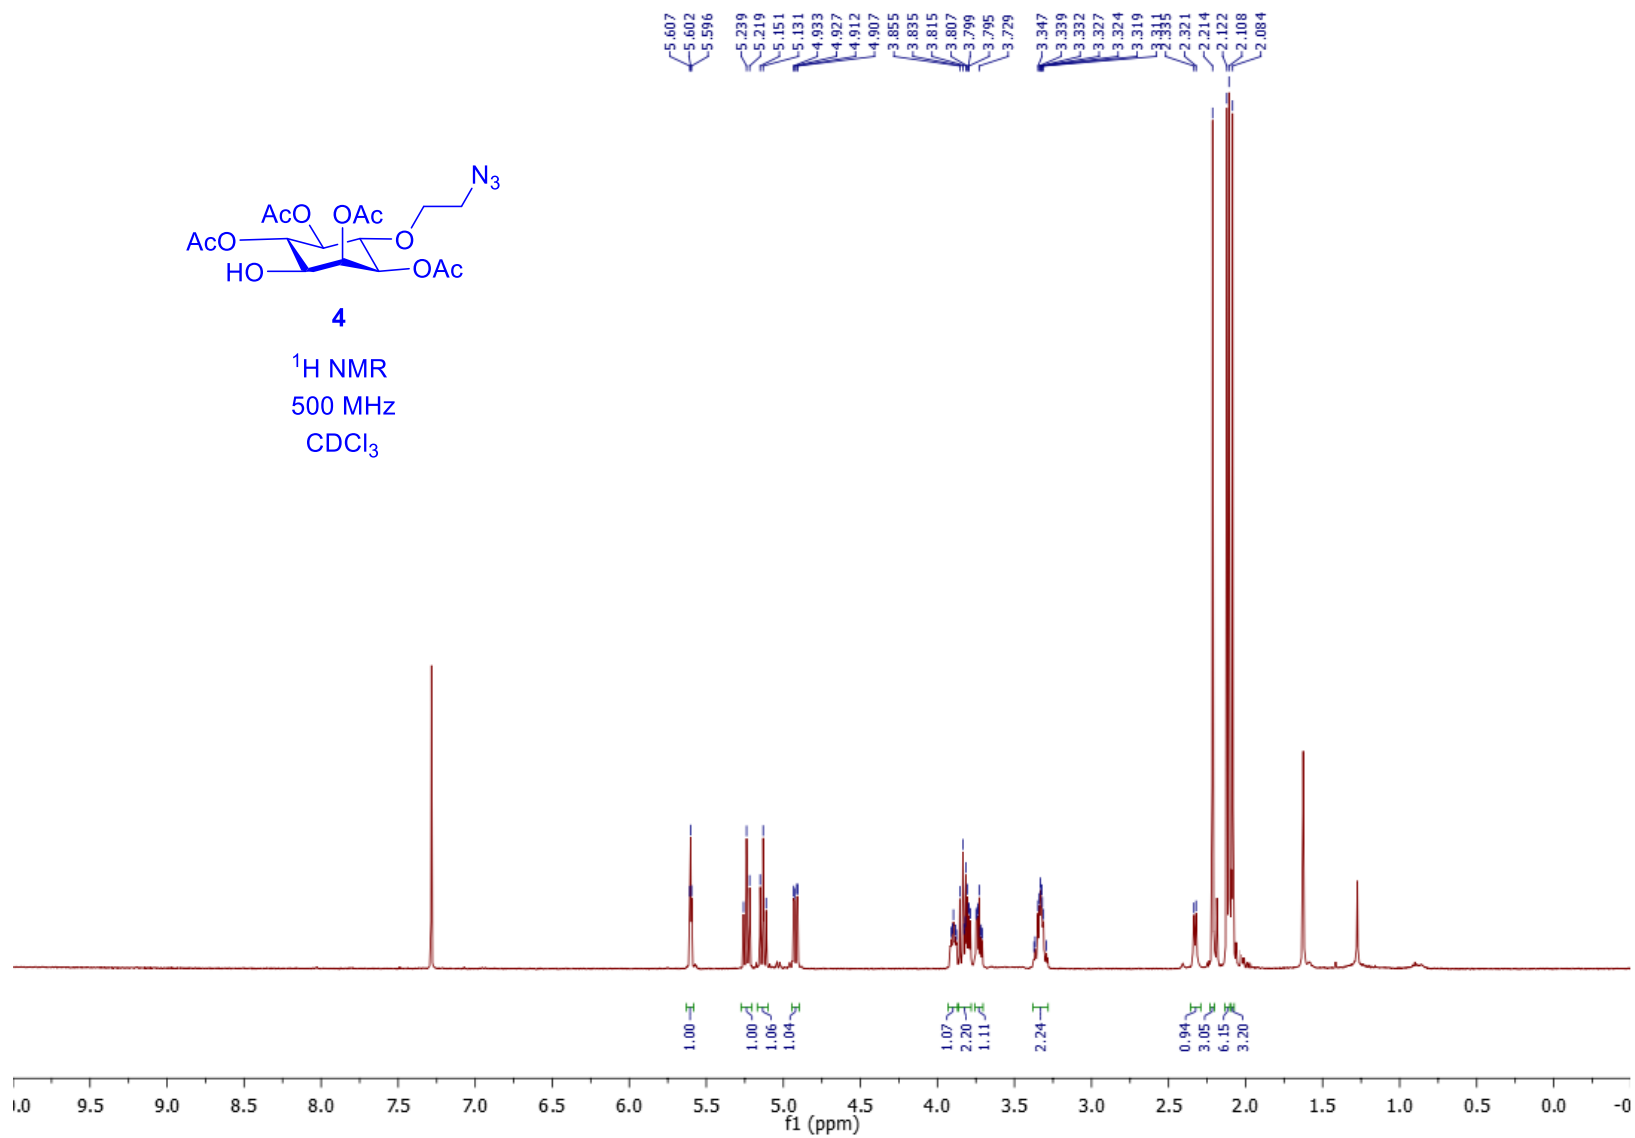

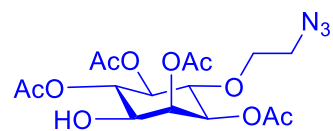

4

$^{13}\text{C}$  NMR  
125 MHz  
 $\text{CDCl}_3$

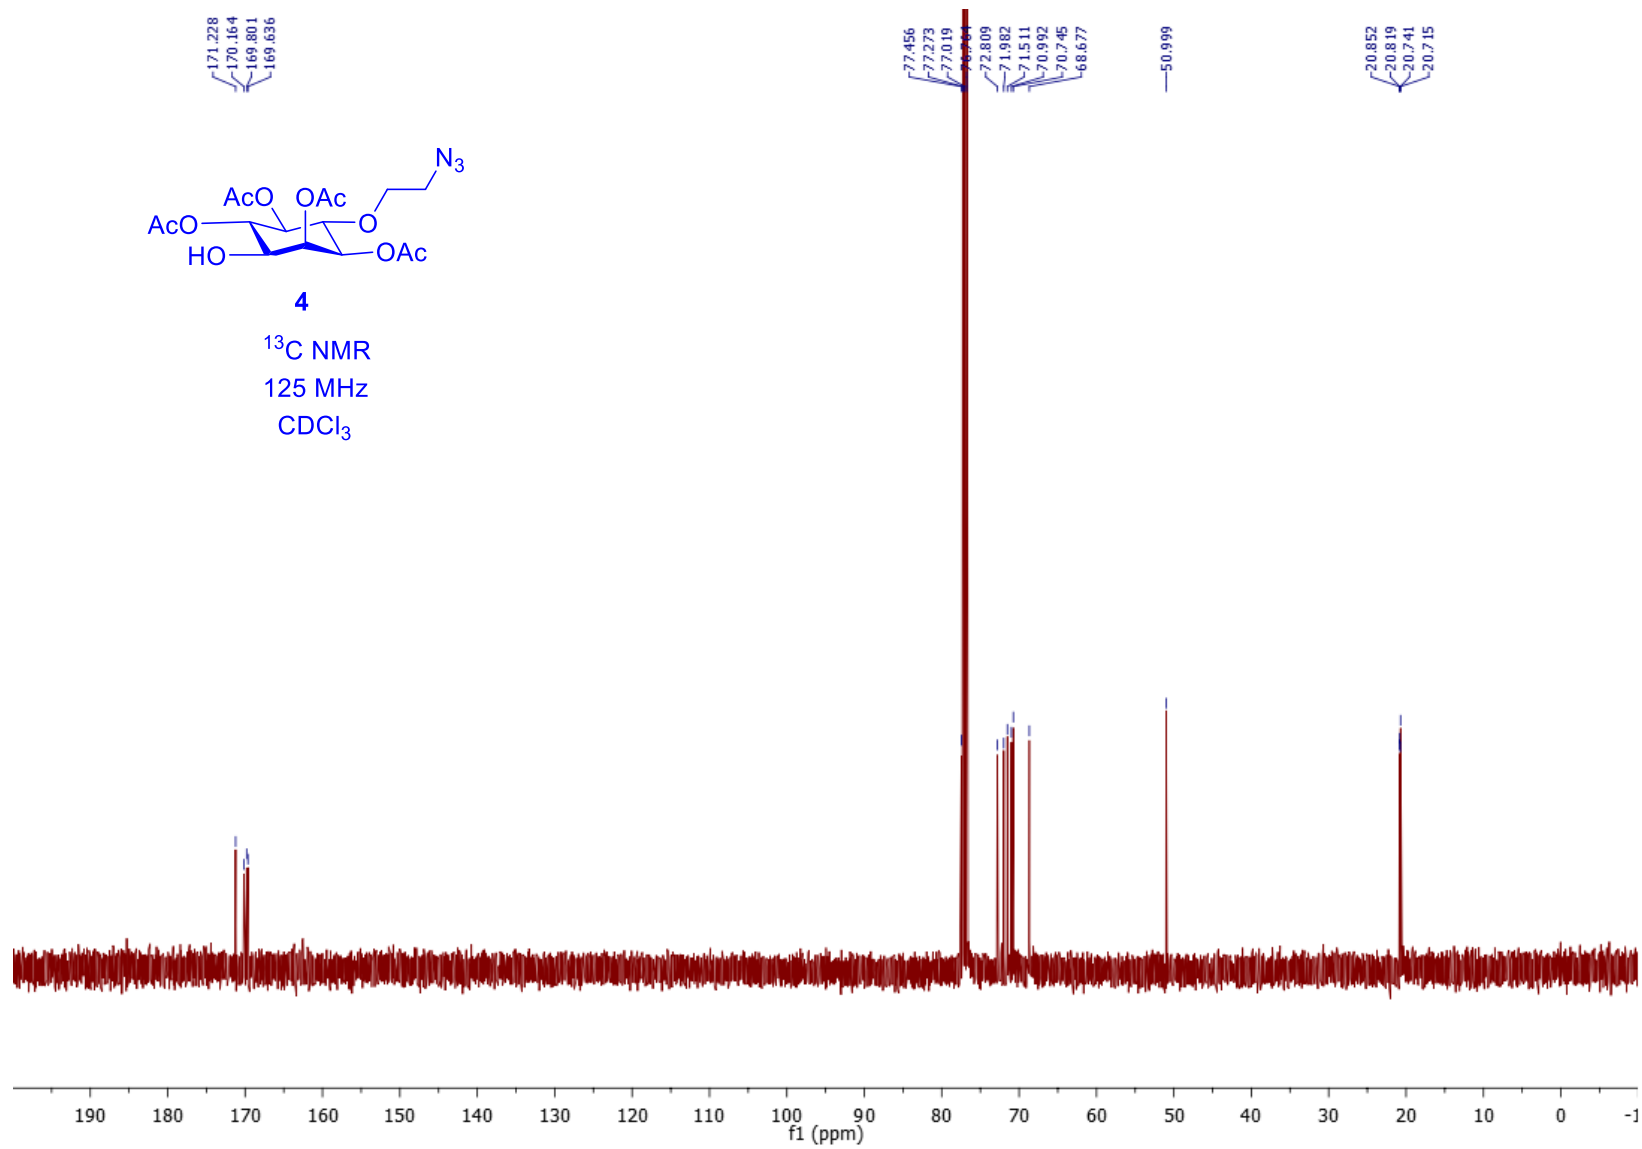

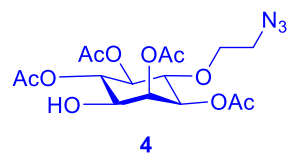

$^1\text{H}$ - $^1\text{H}$  COSY  
 500 MHz  
 $\text{CDCl}_3$

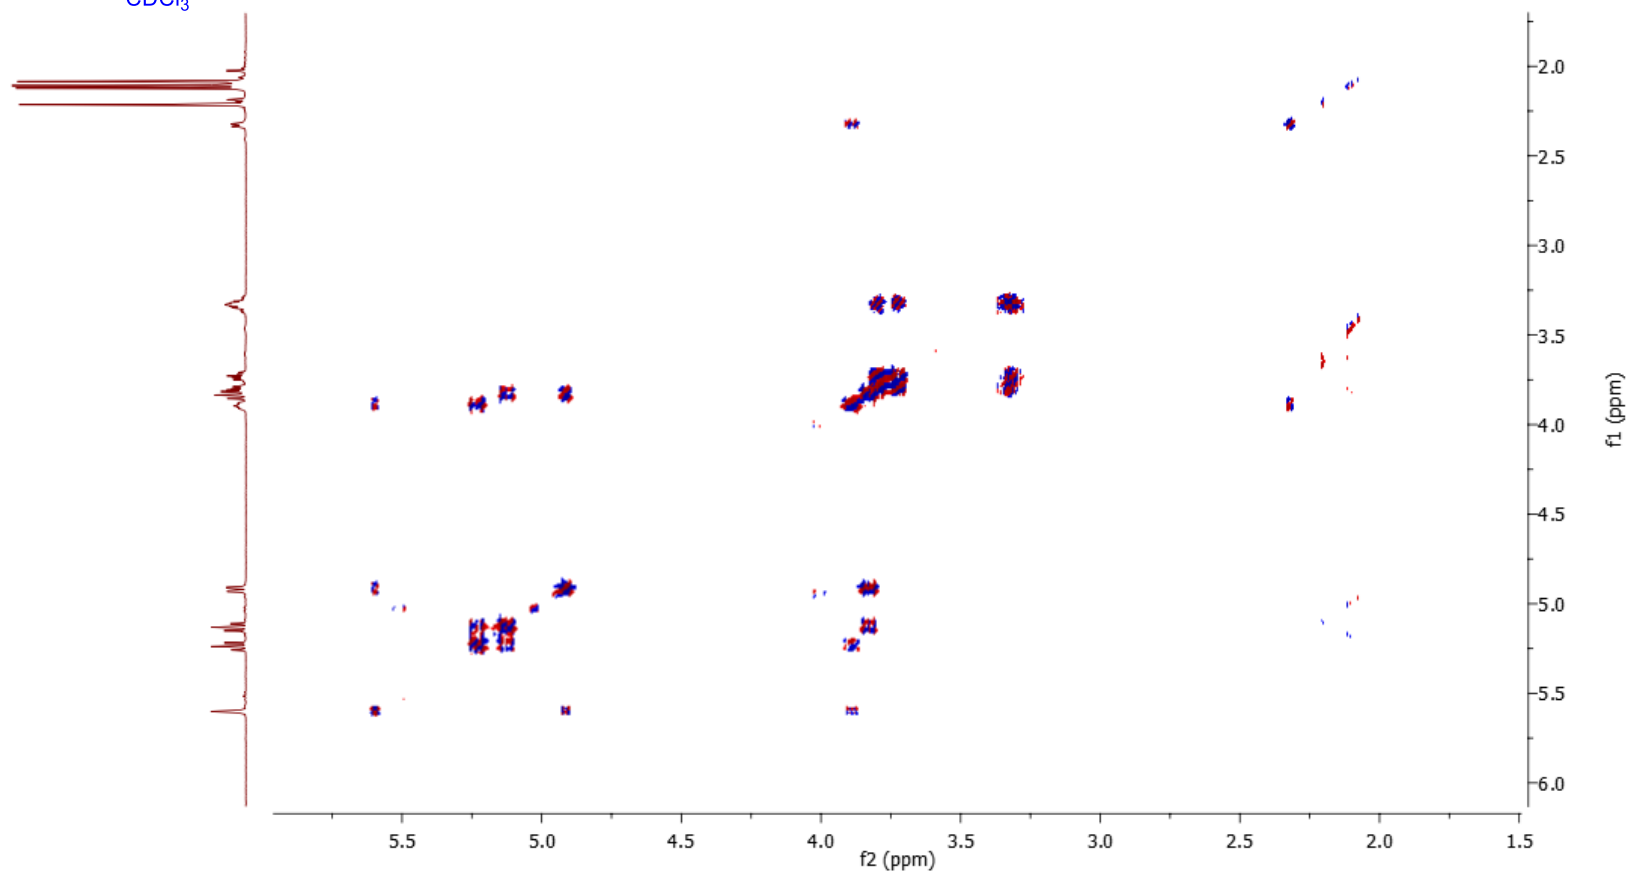

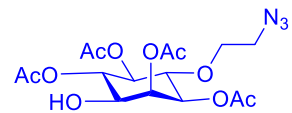

4

$^1\text{H}$ - $^{13}\text{C}$  HSQC  
500/125 MHz  
 $\text{CDCl}_3$

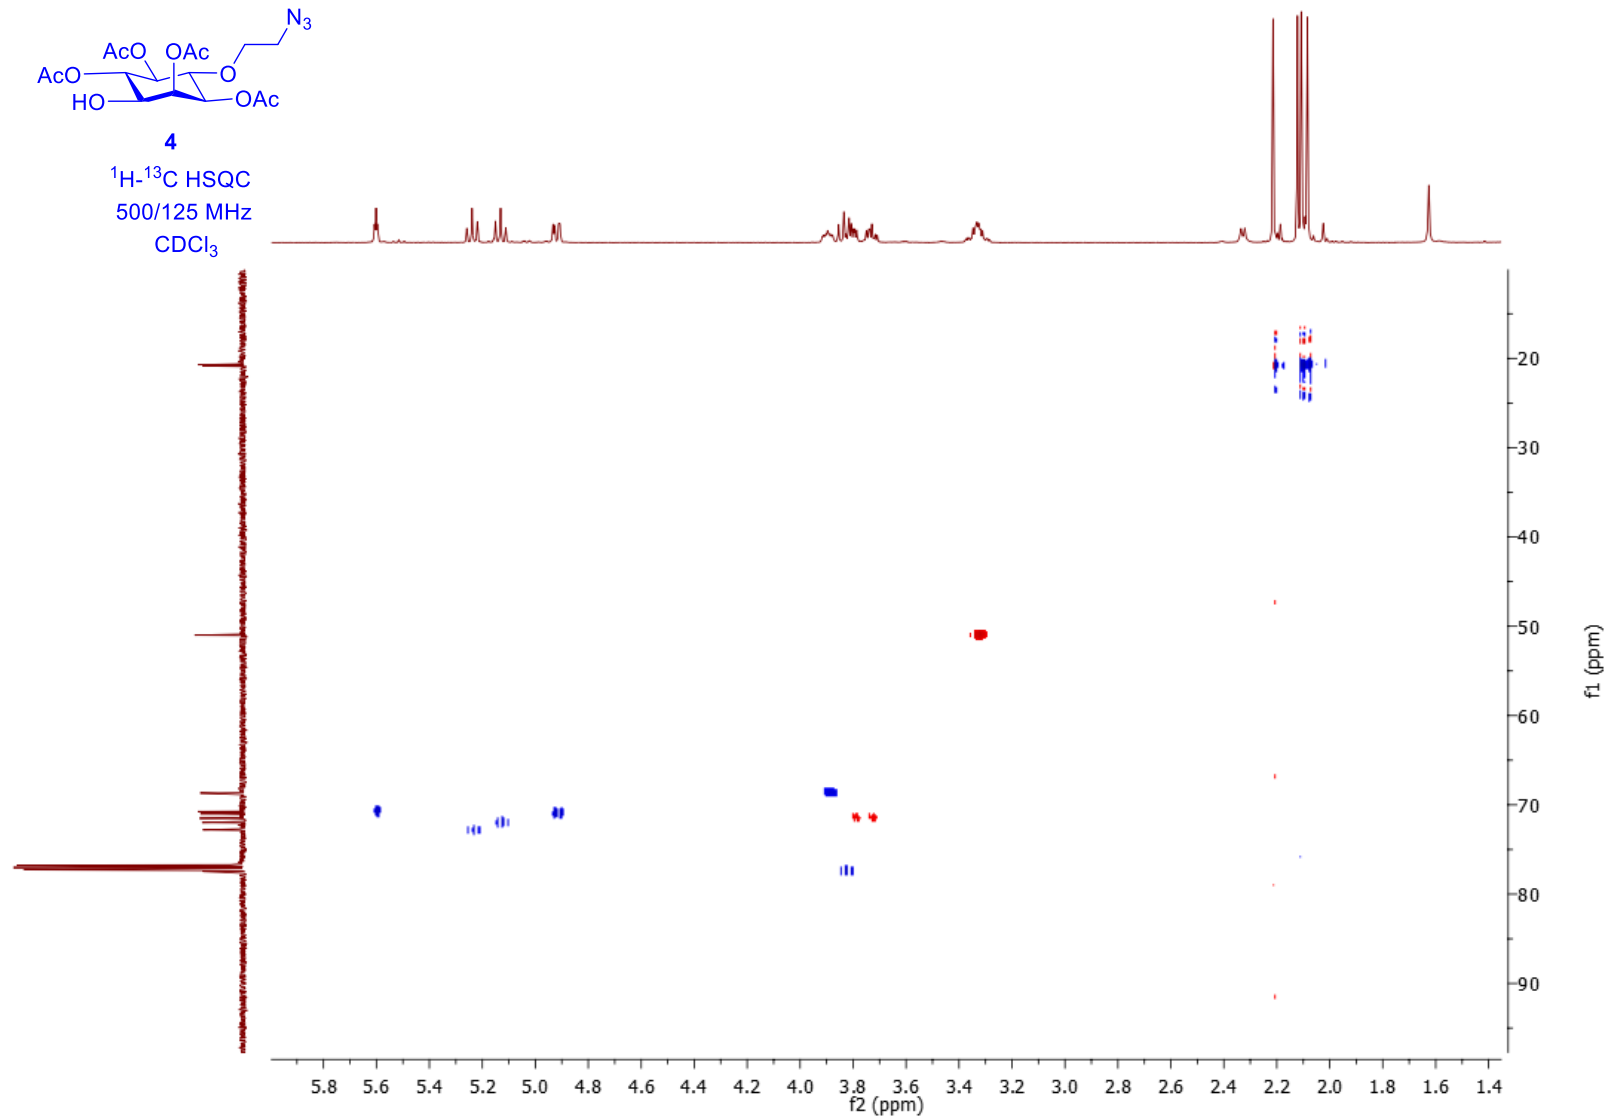



+ESI Scan (0.231-0.505 min, 34 Scans) Frag=175.0V 28155\_zsy-2-184\_ESI.d Subtract

Theoretical  $[M+NH_4]^+ = 435.1722$  (1.4 ppm)  
 $[M+Na]^+ = 440.1276$  (4.1 ppm)

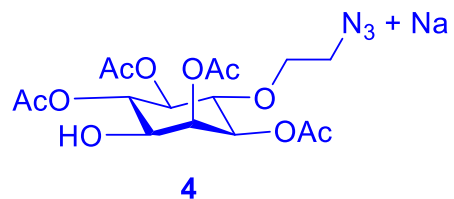

Chemical Formula:  $C_{16}H_{23}N_3NaO_{10}^+$   
Exact Mass: 440.1276

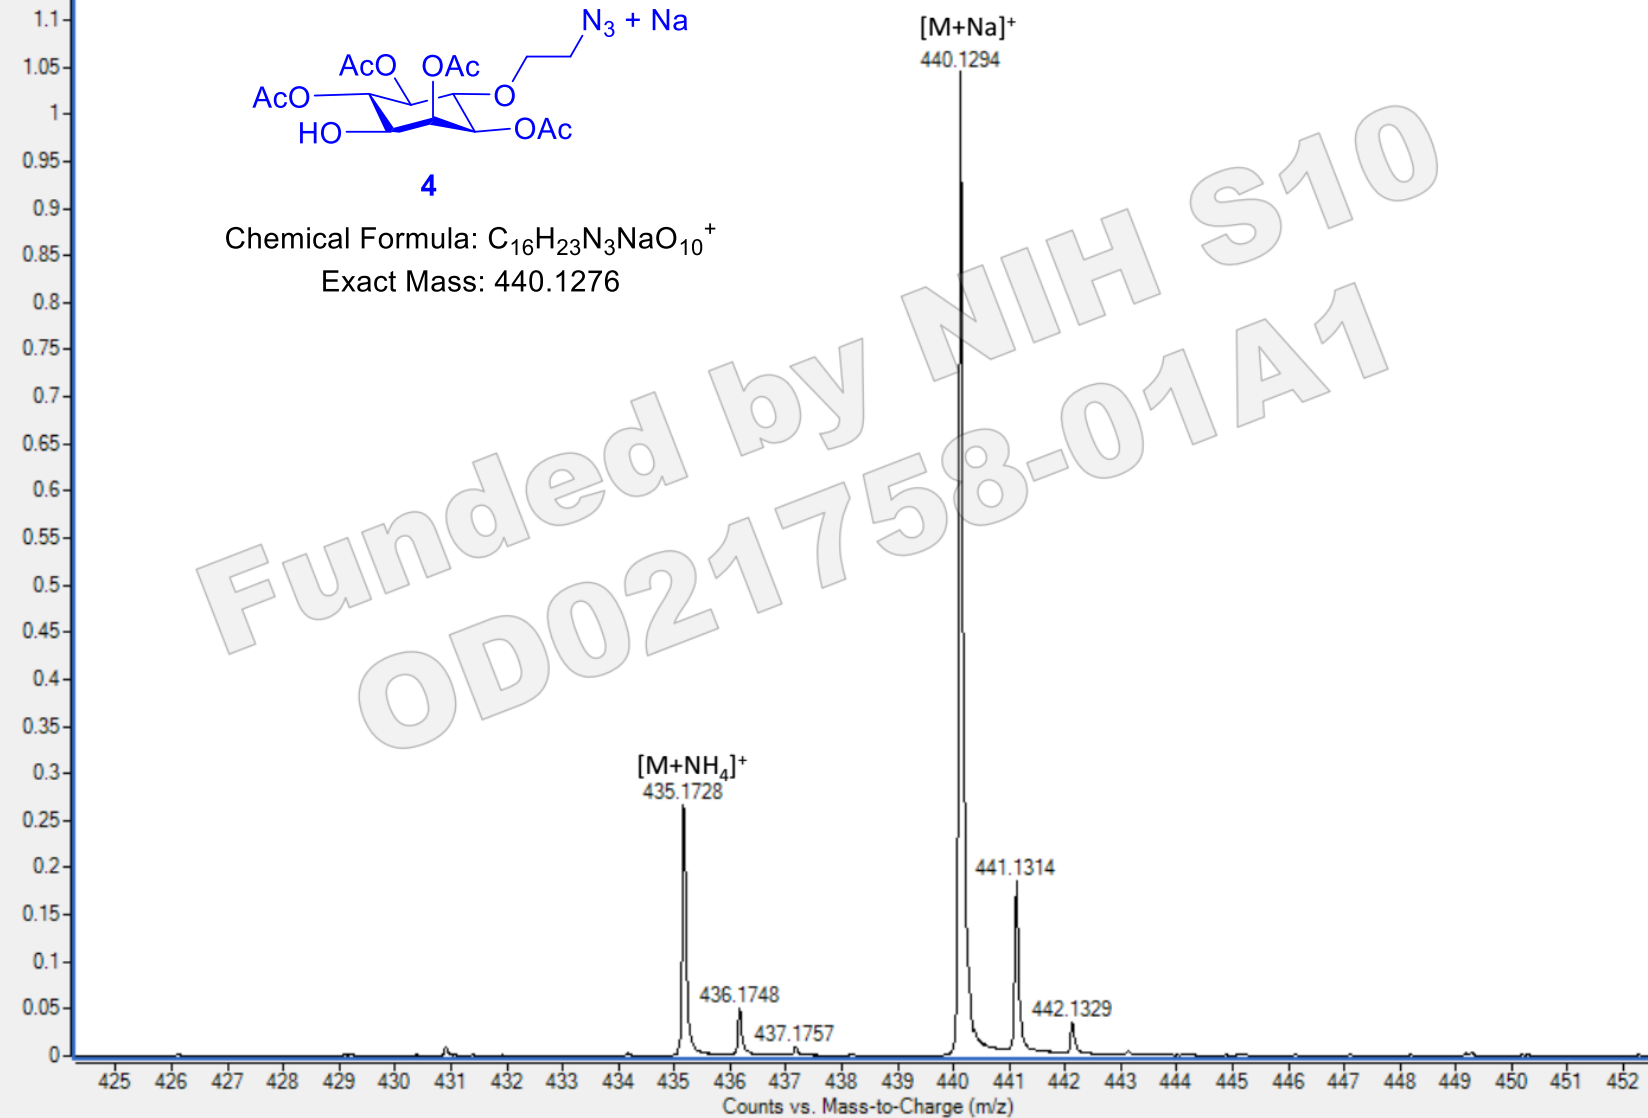

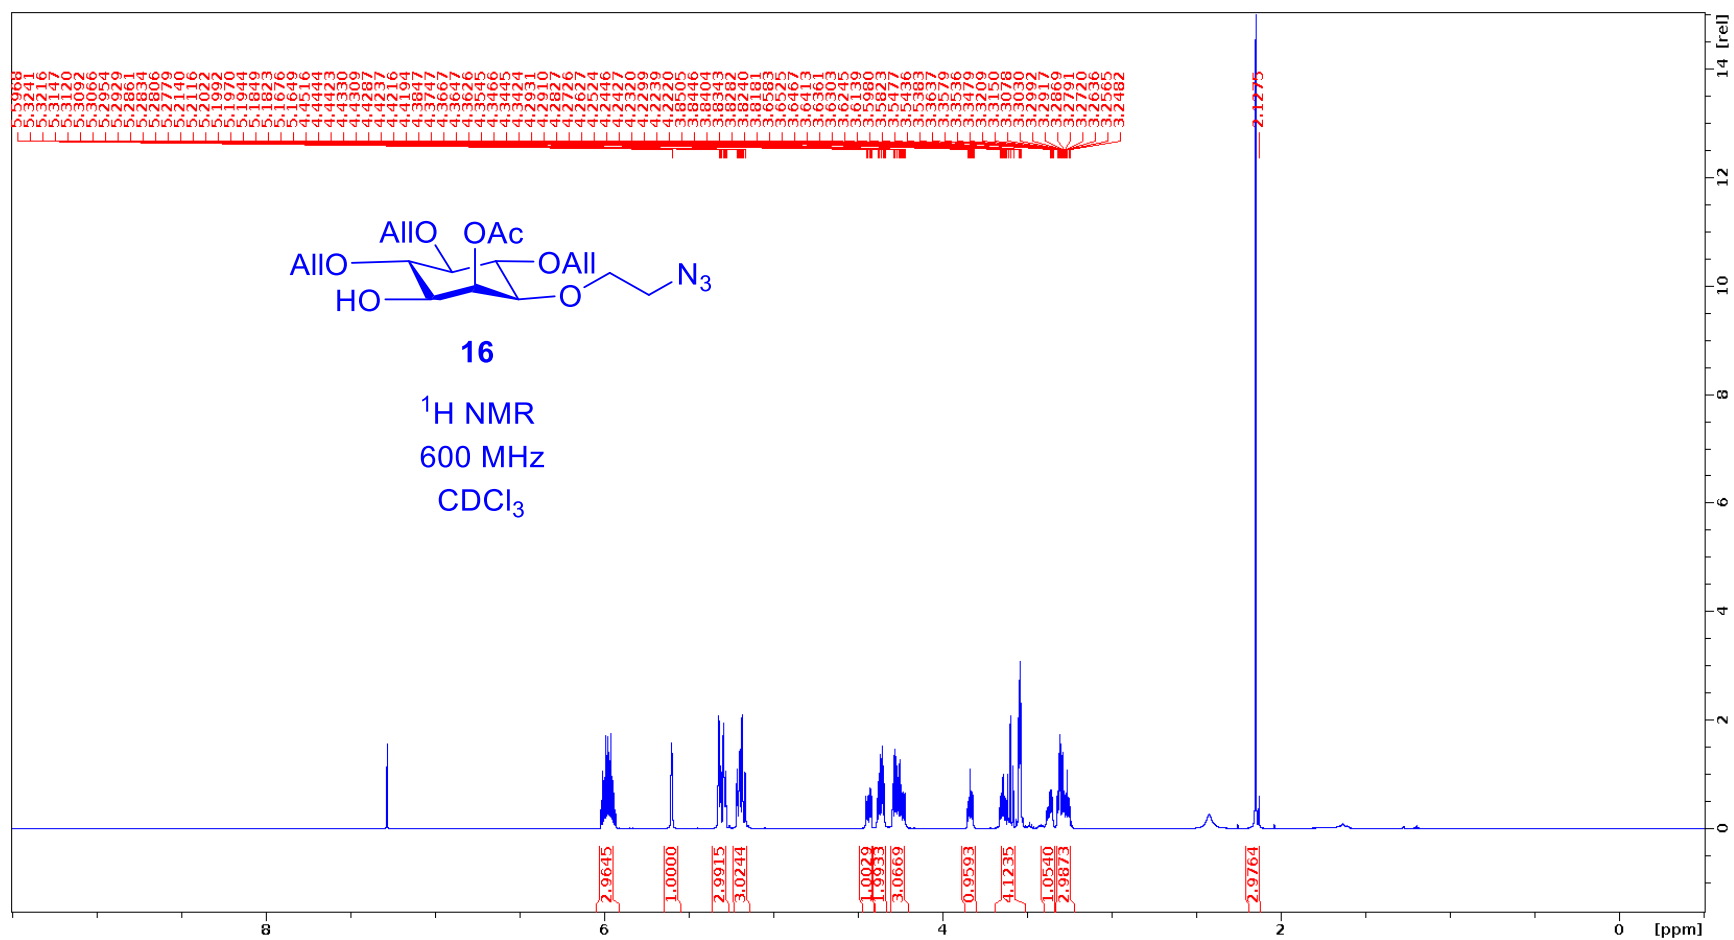

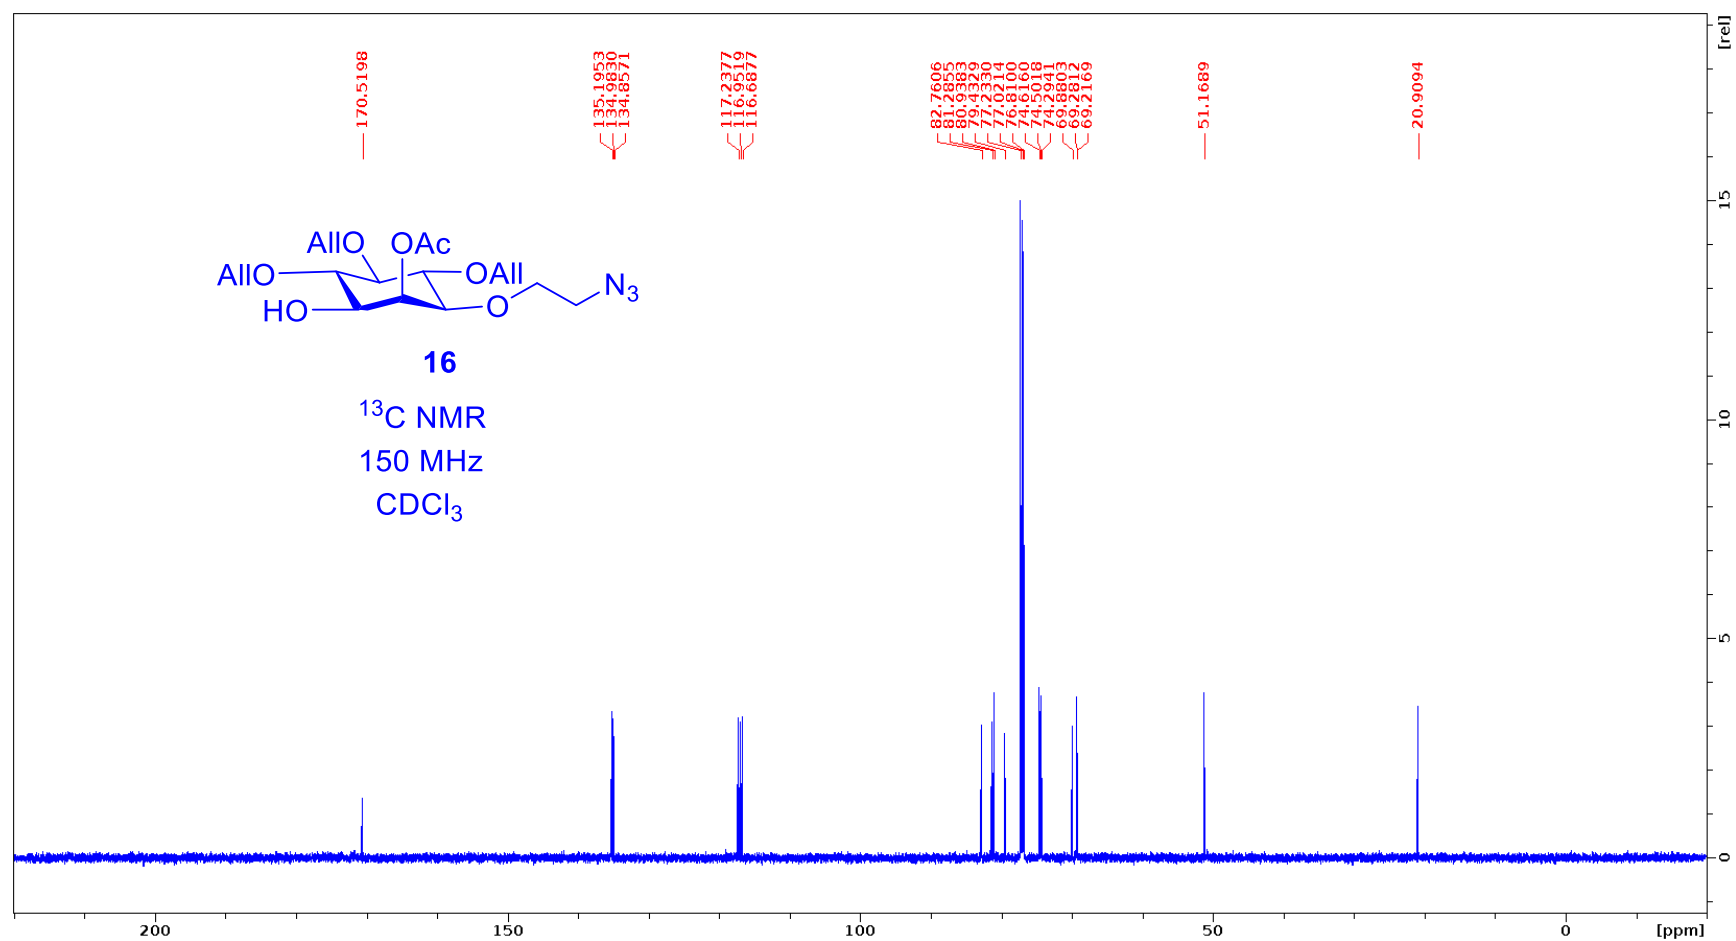

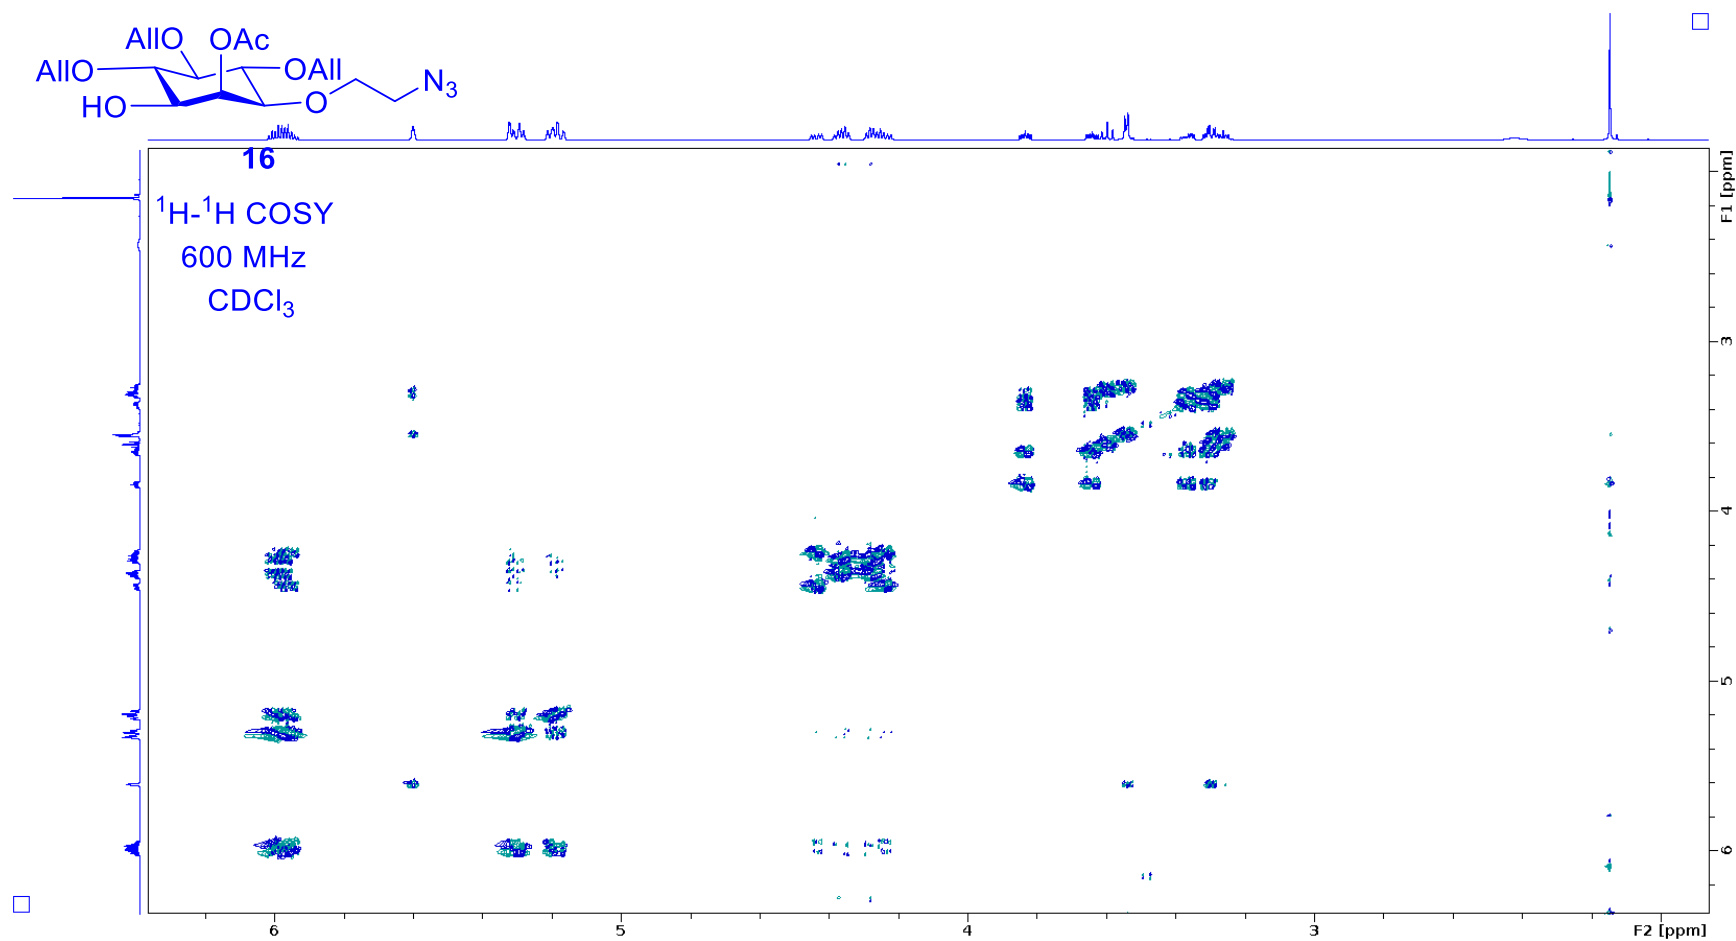

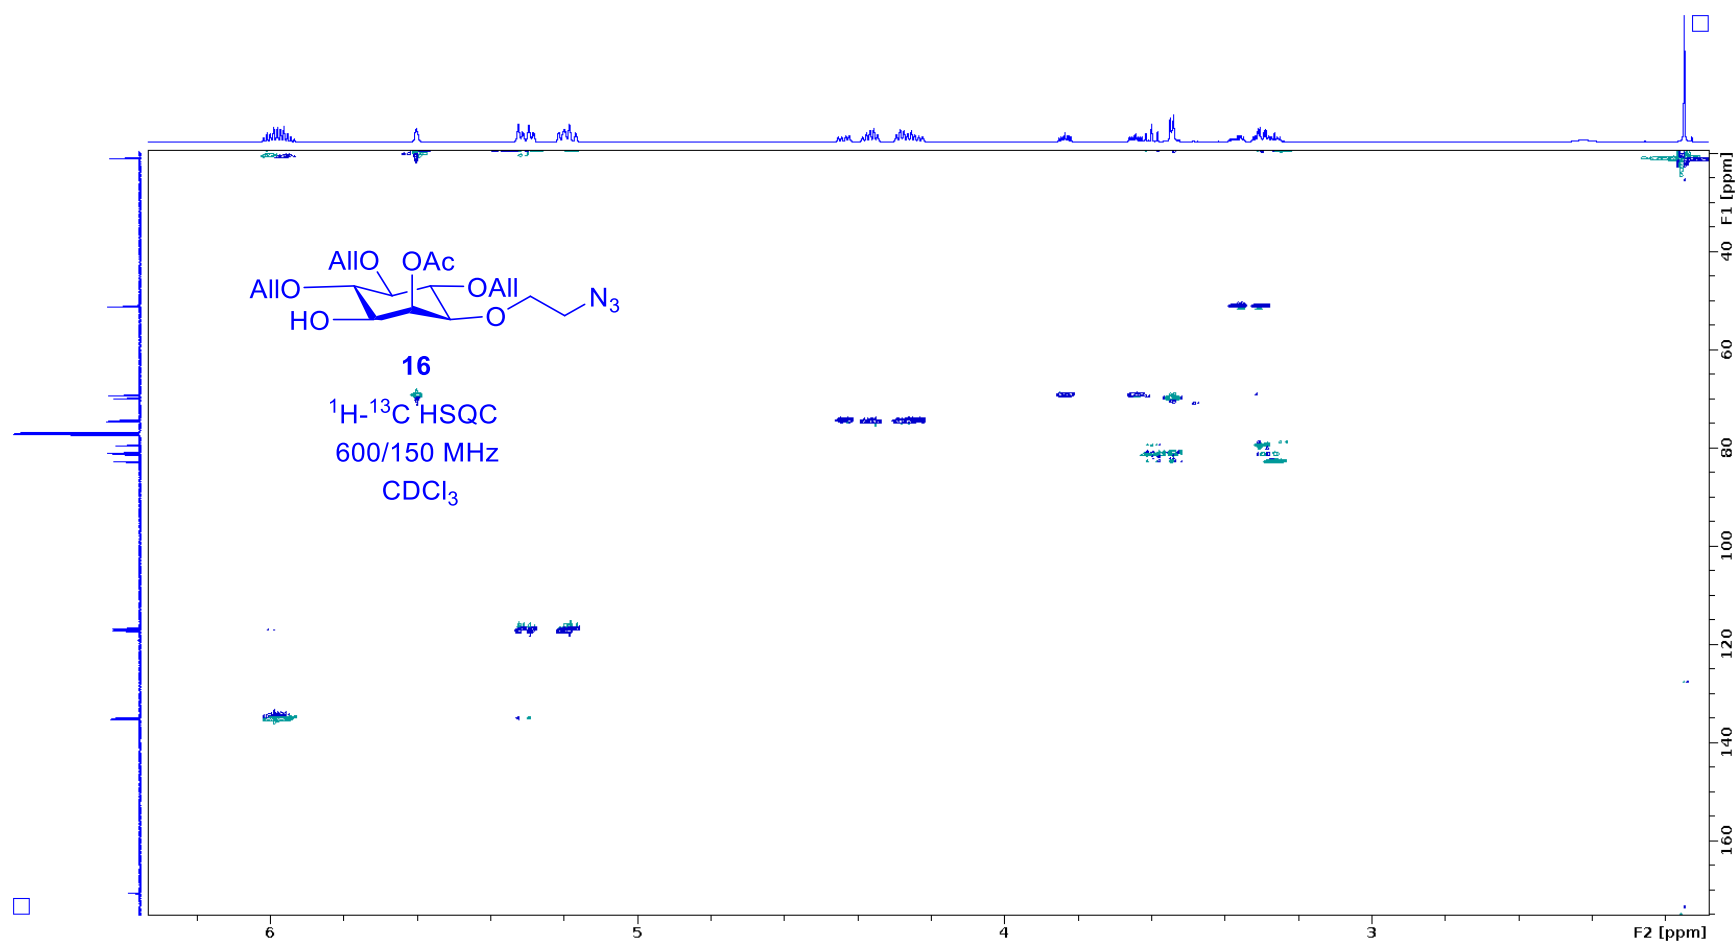

x10<sup>4</sup> +ESI Scan (0.256-0.613 min, 44 Scans) Frag=175.0V 28151\_zsy-3-45\_ESI.d Subtract

Theoretical [M+Na]<sup>+</sup> = 434.1898 (3.9 ppm)

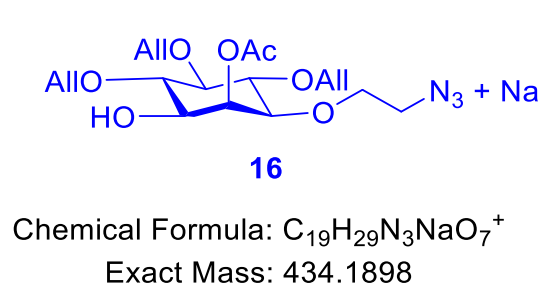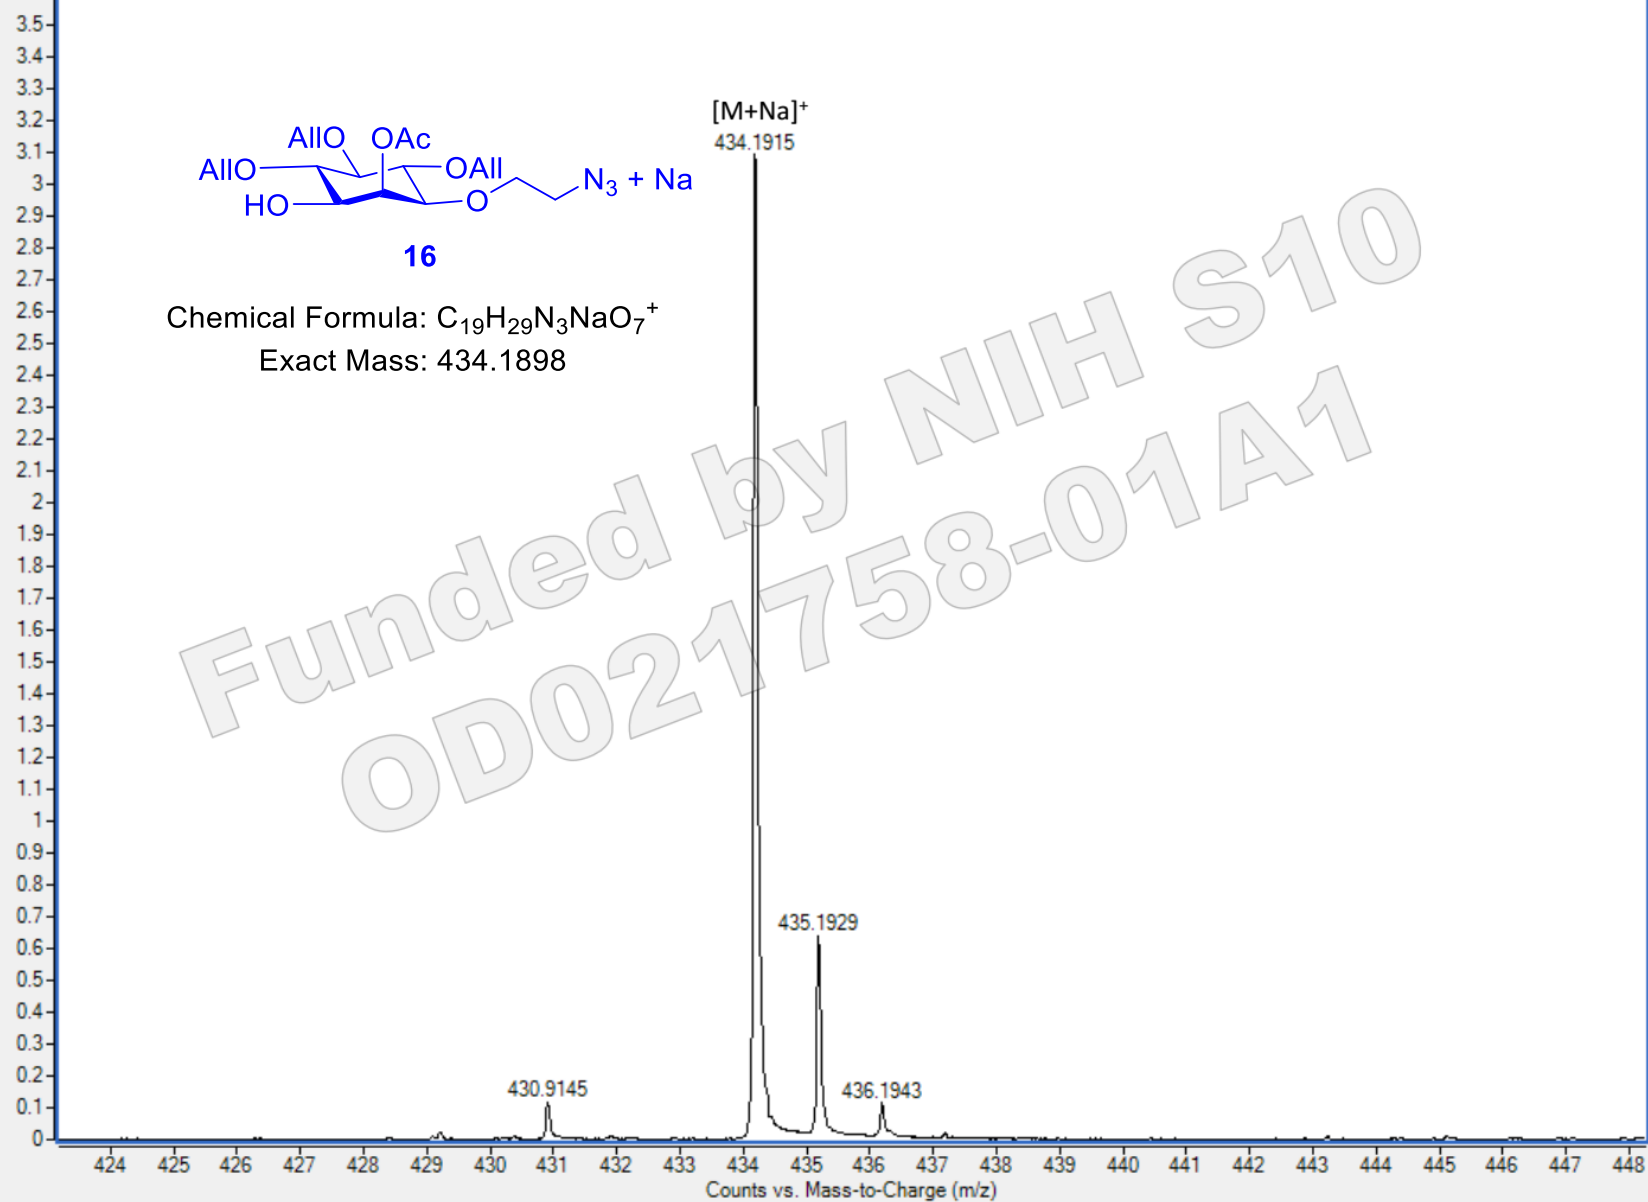

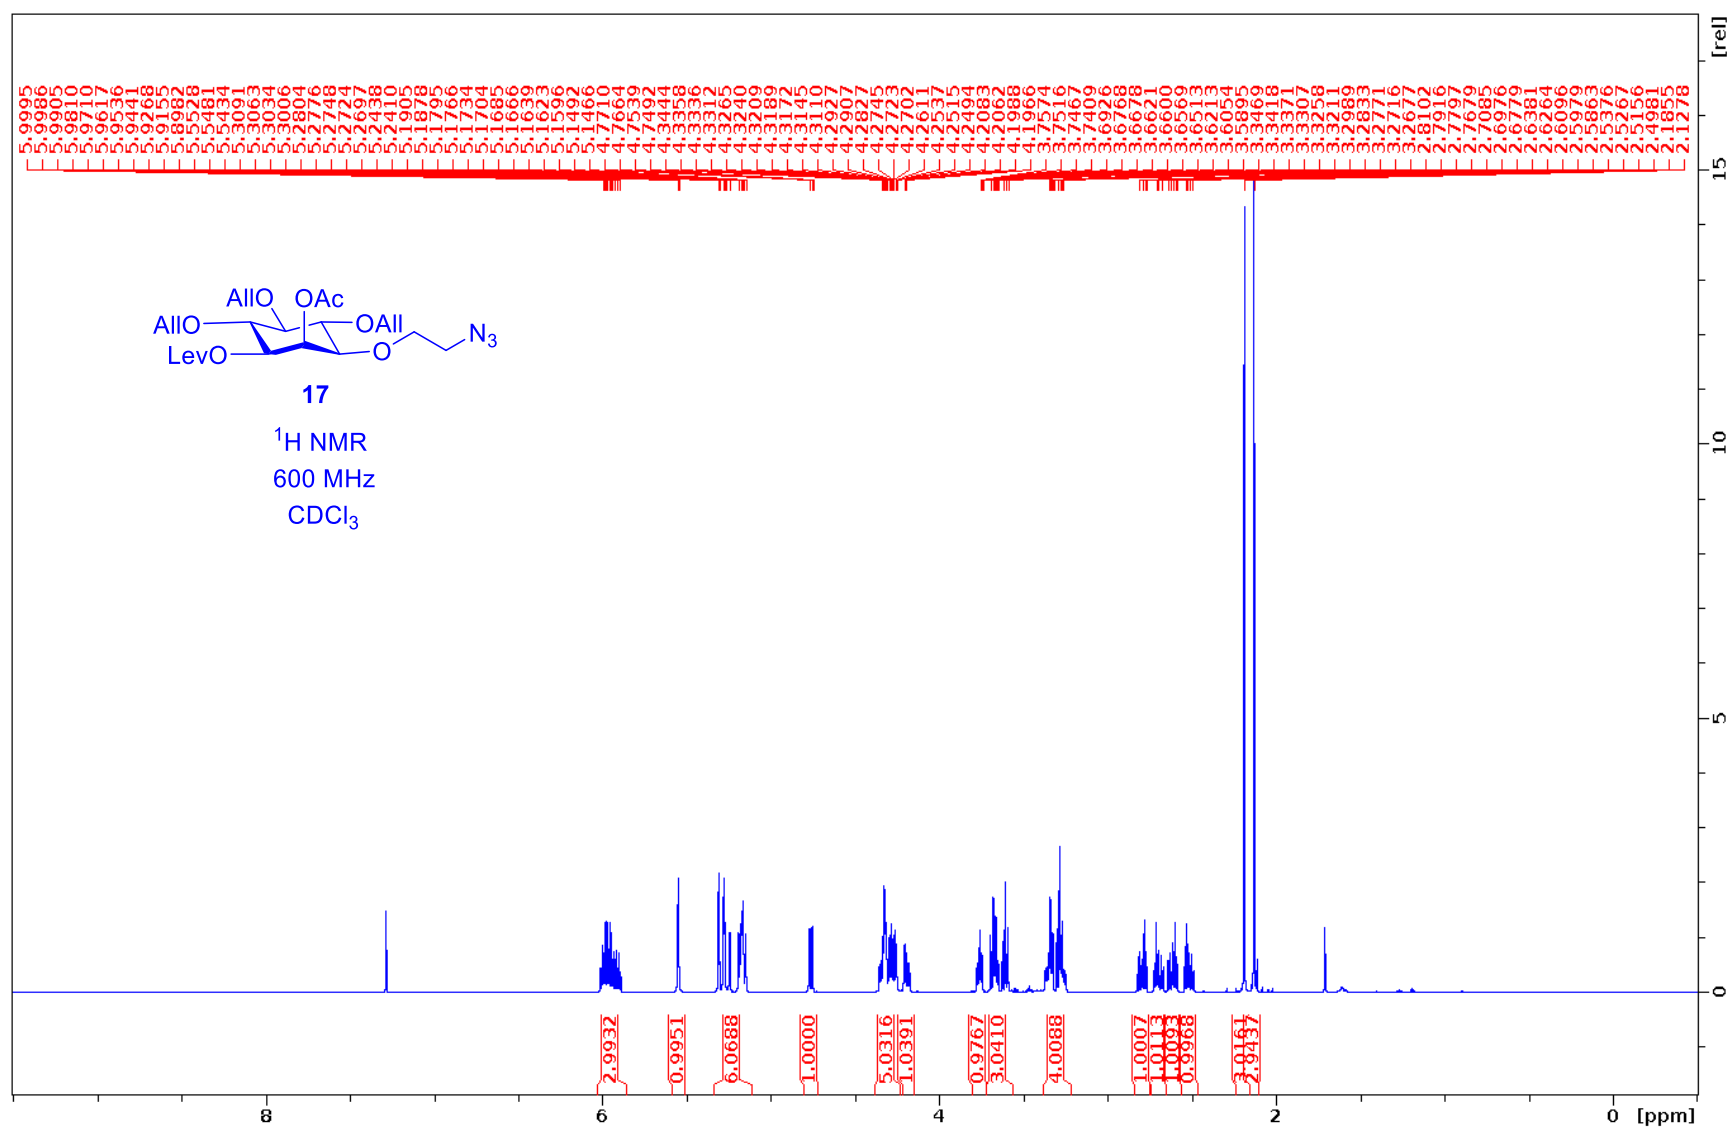

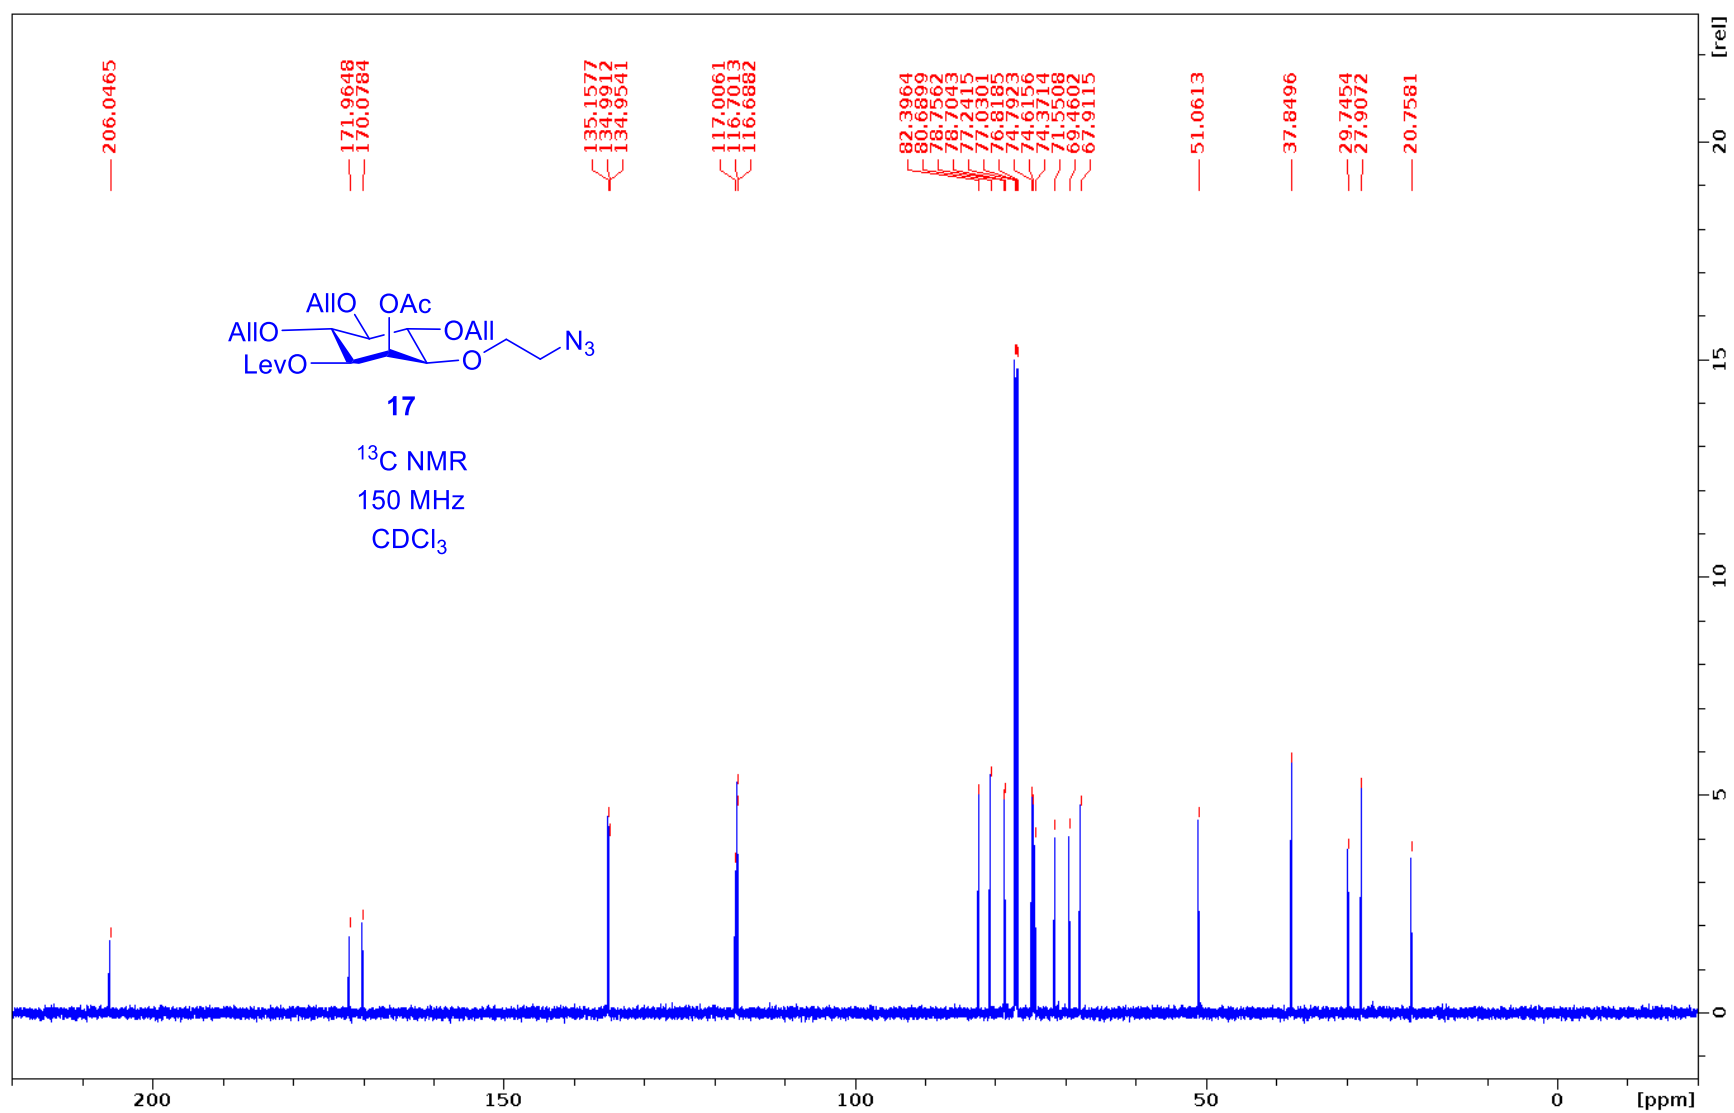



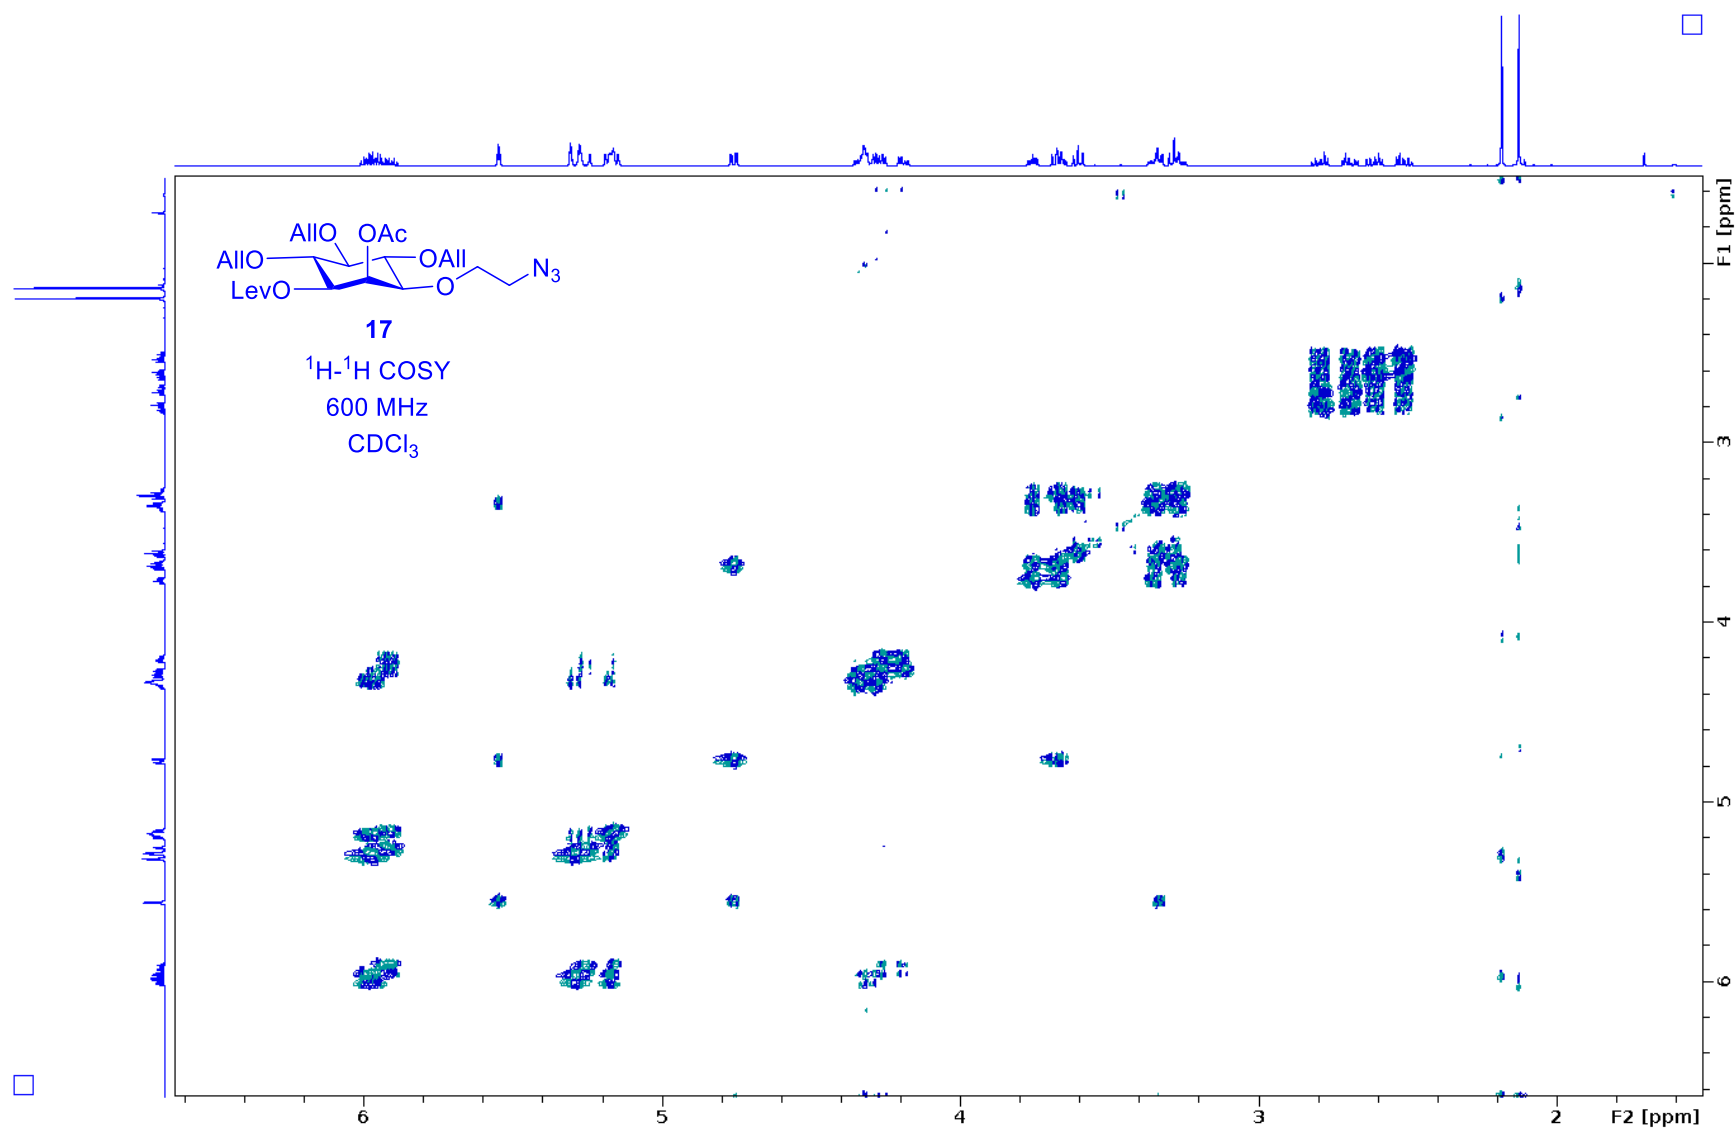



x10<sup>4</sup> +ESI Scan (0.420-0.736 min, 39 Scans) Frag=175.0V 28156\_zsy-3-48\_ESI.d Subtract

Theoretical  $[M+NH_4]^+ = 527.2712$  (1.1 ppm)  
 $[M+Na]^+ = 532.2266$  (3.9 ppm)

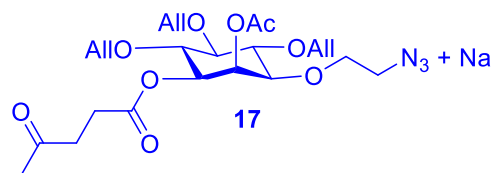

Chemical Formula: C<sub>24</sub>H<sub>35</sub>N<sub>3</sub>NaO<sub>9</sub><sup>+</sup>  
Exact Mass: 532.2266

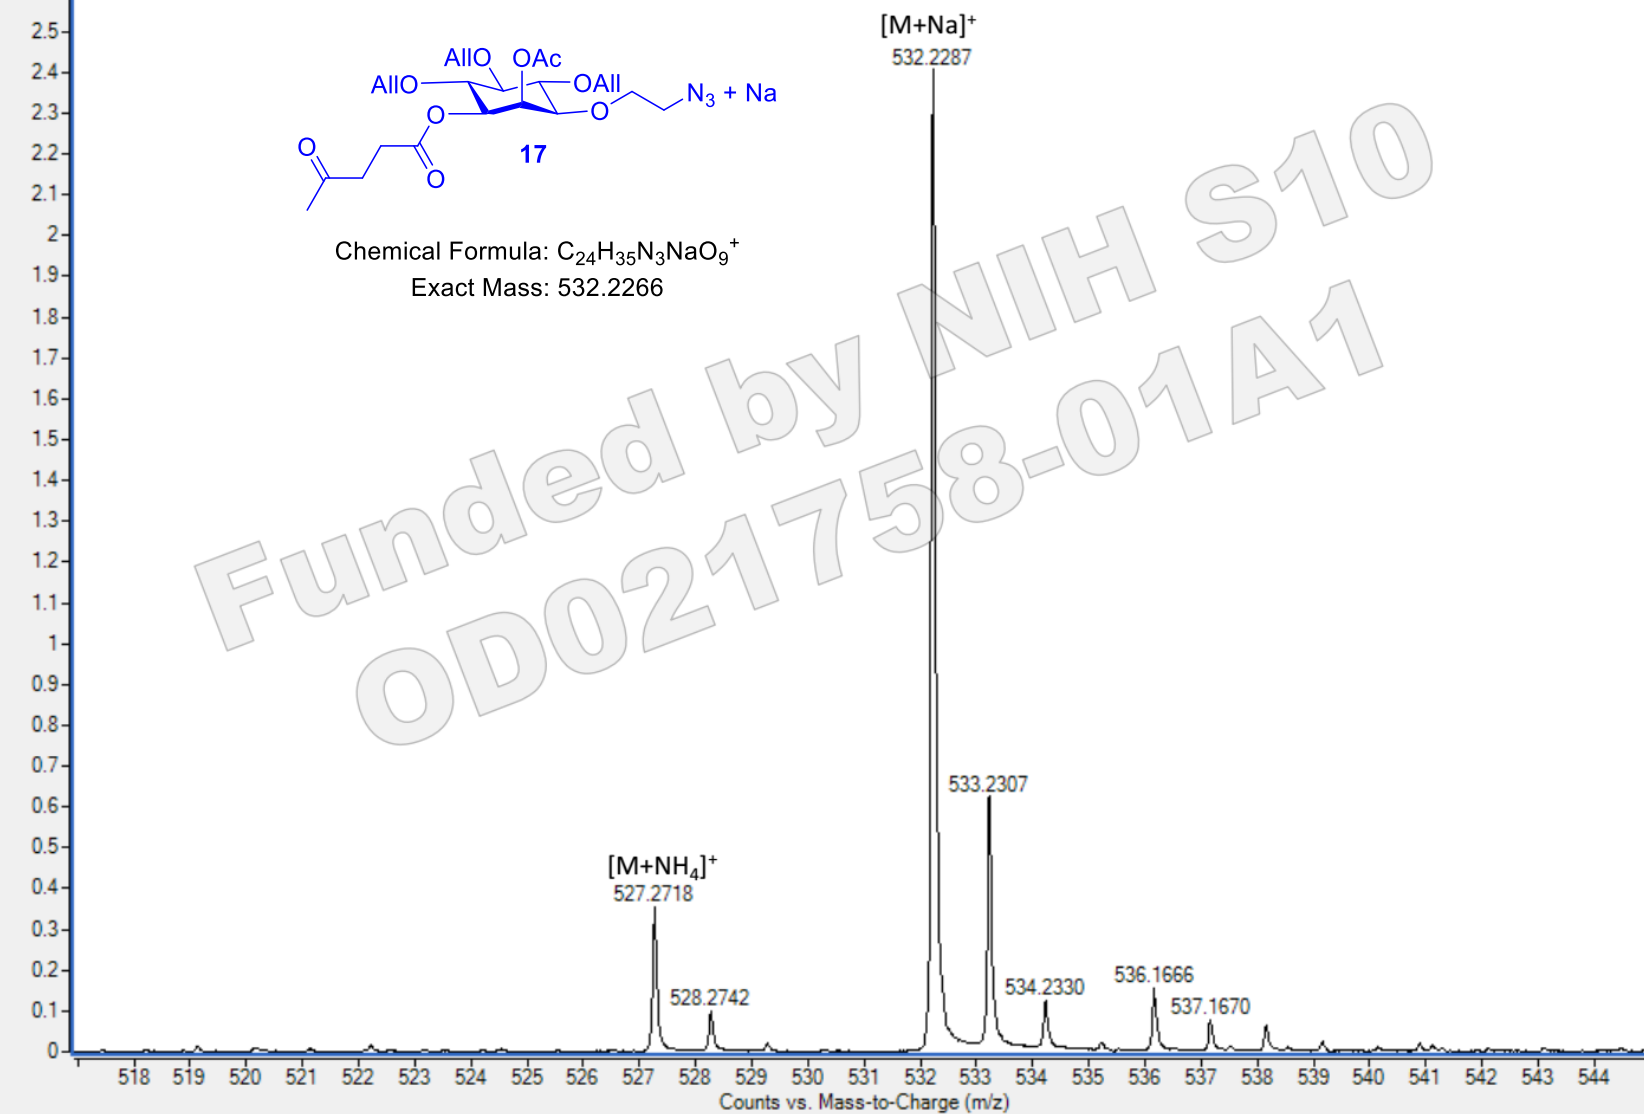

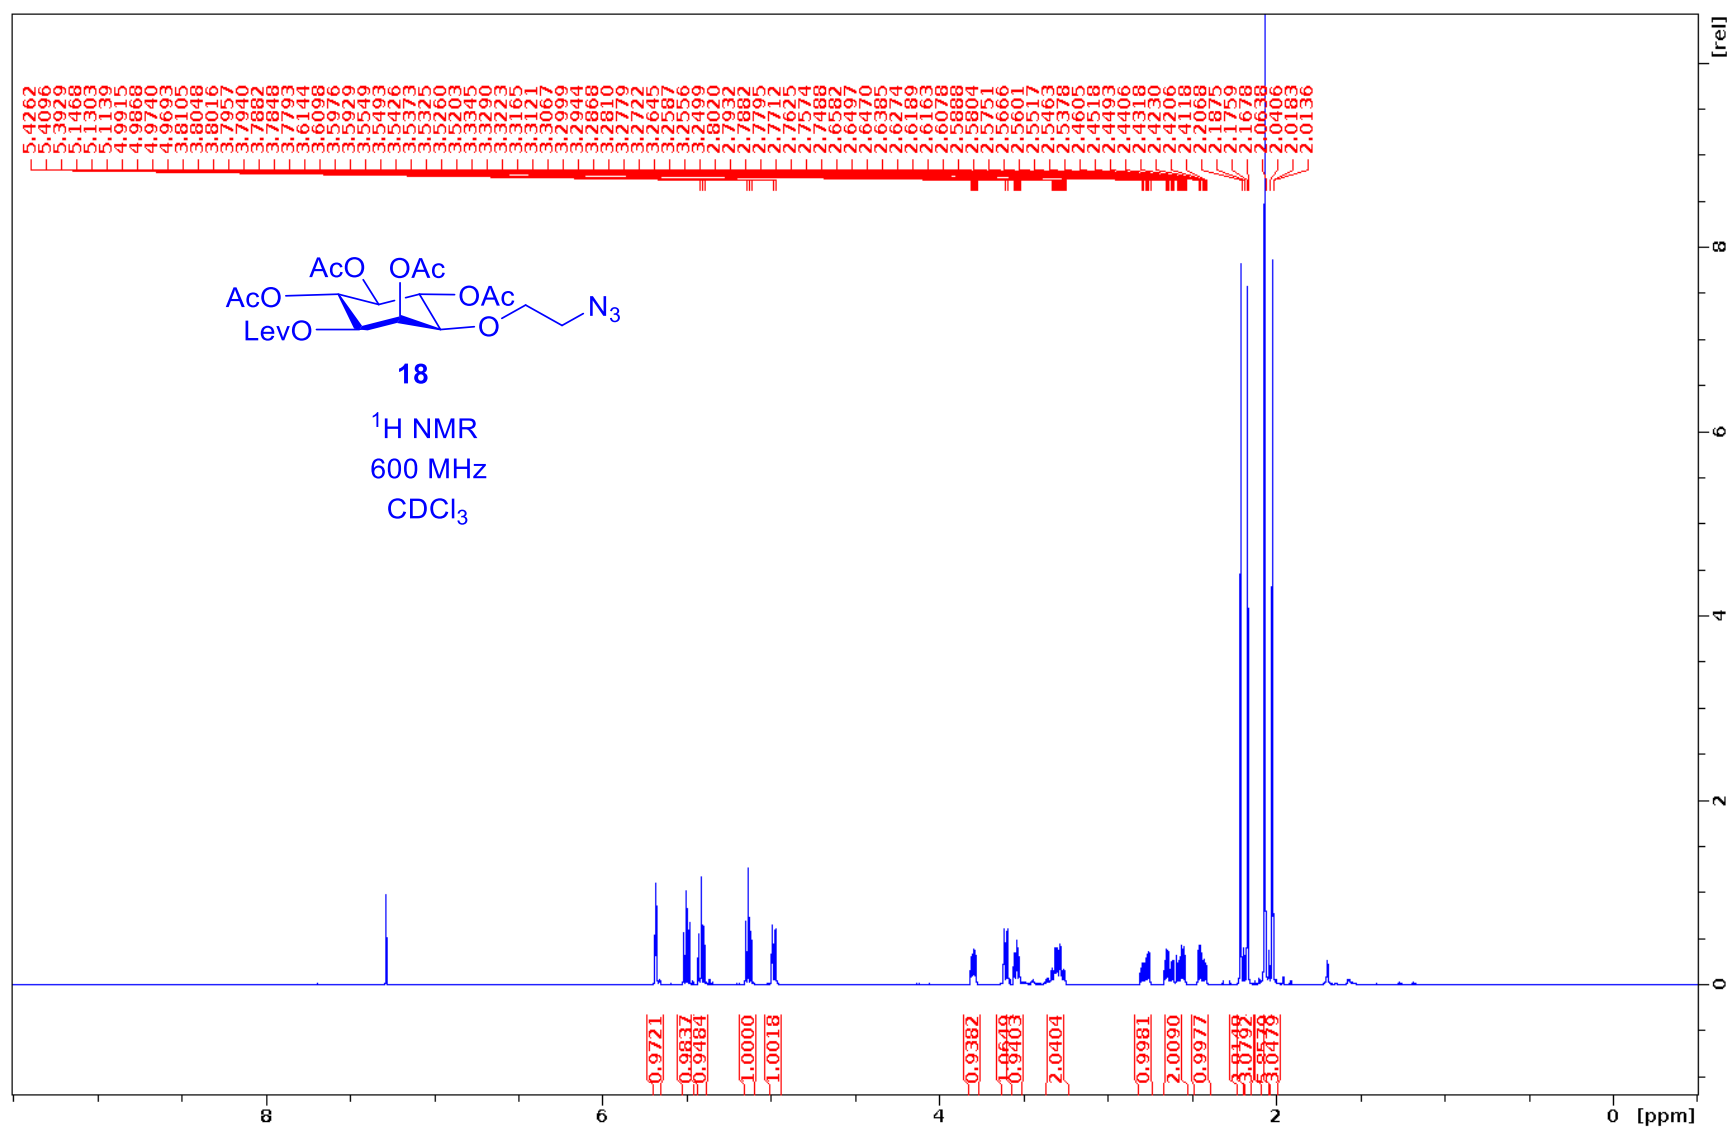

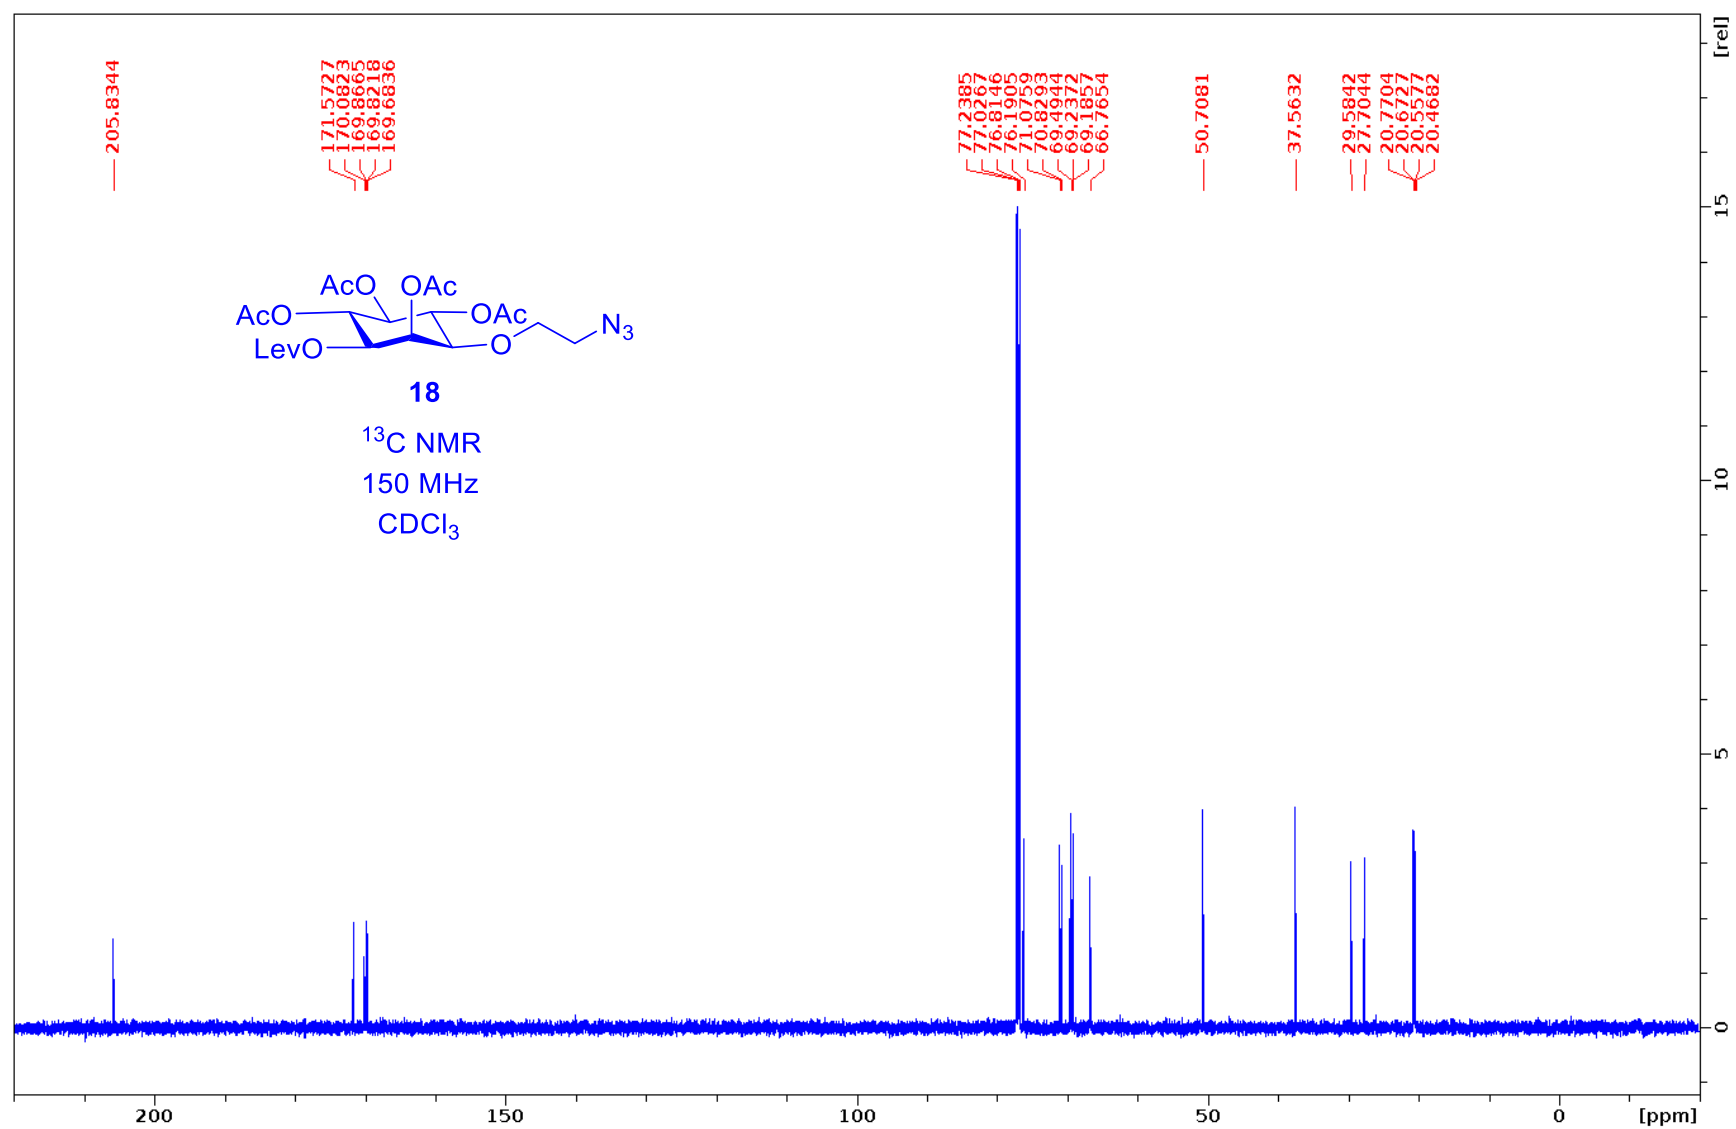

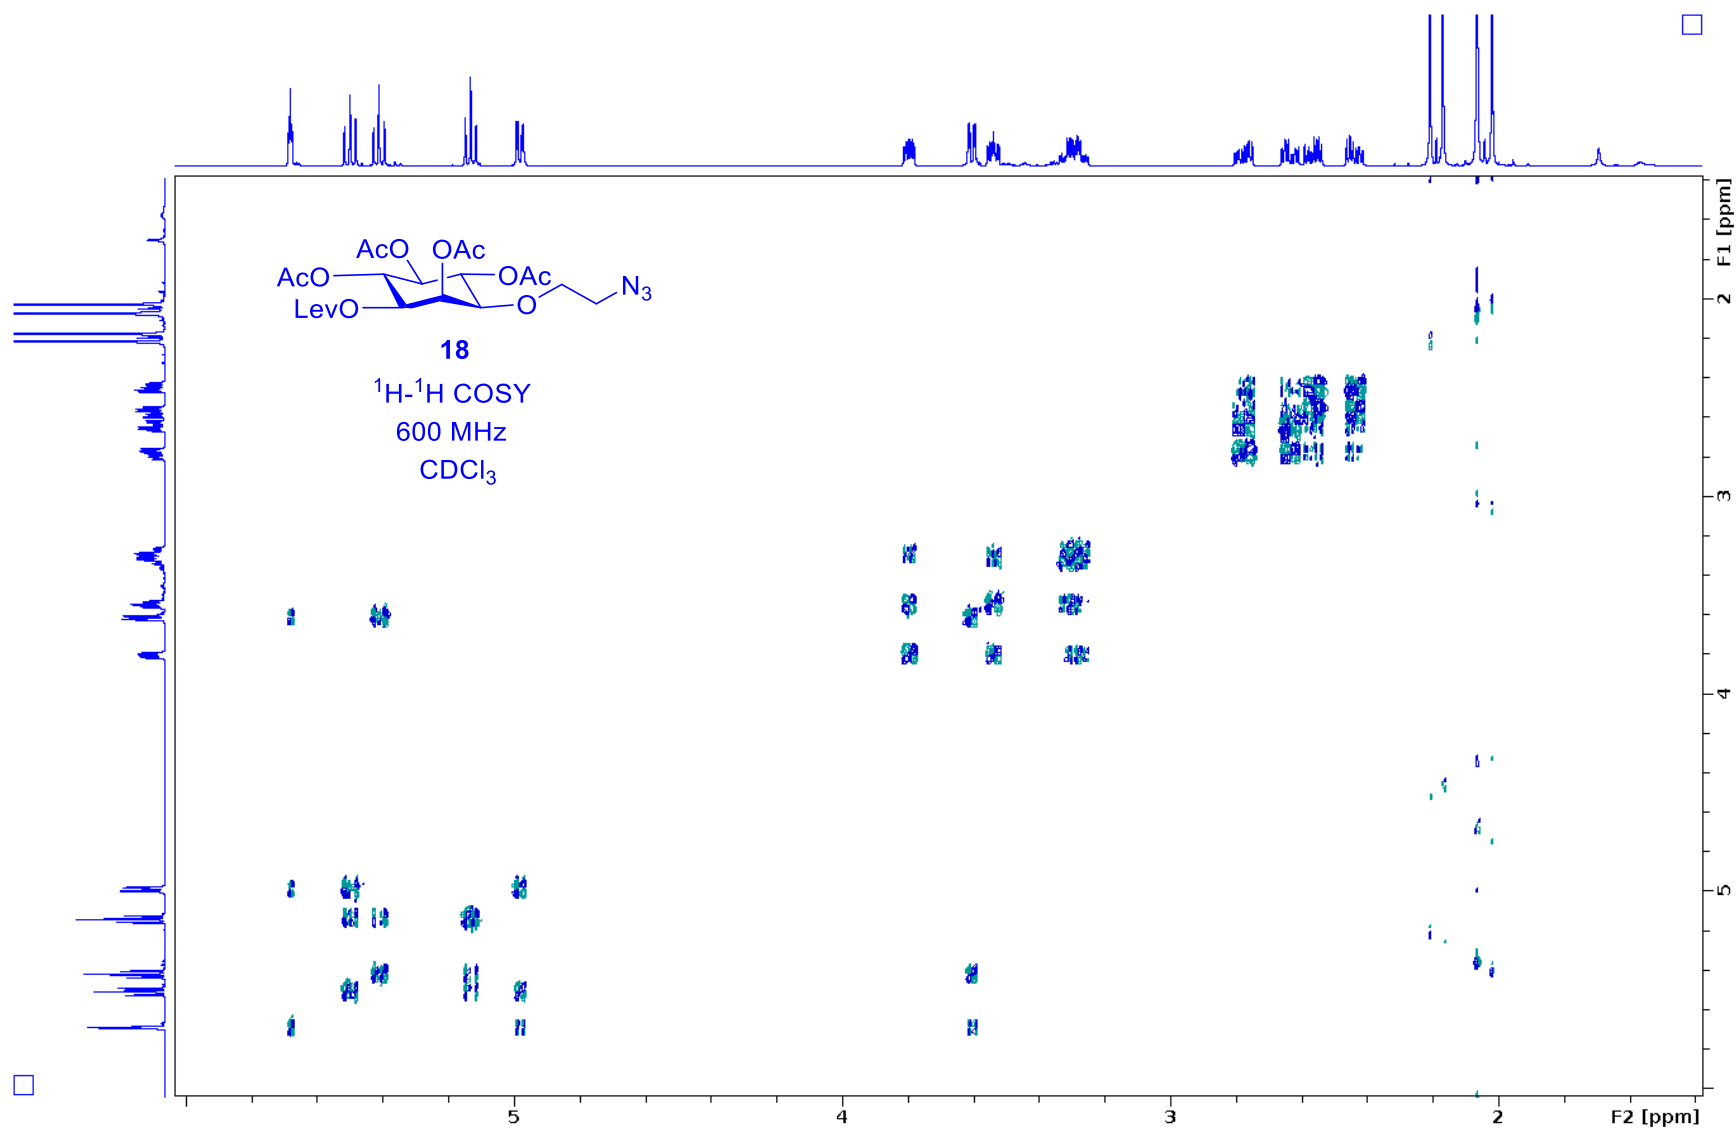

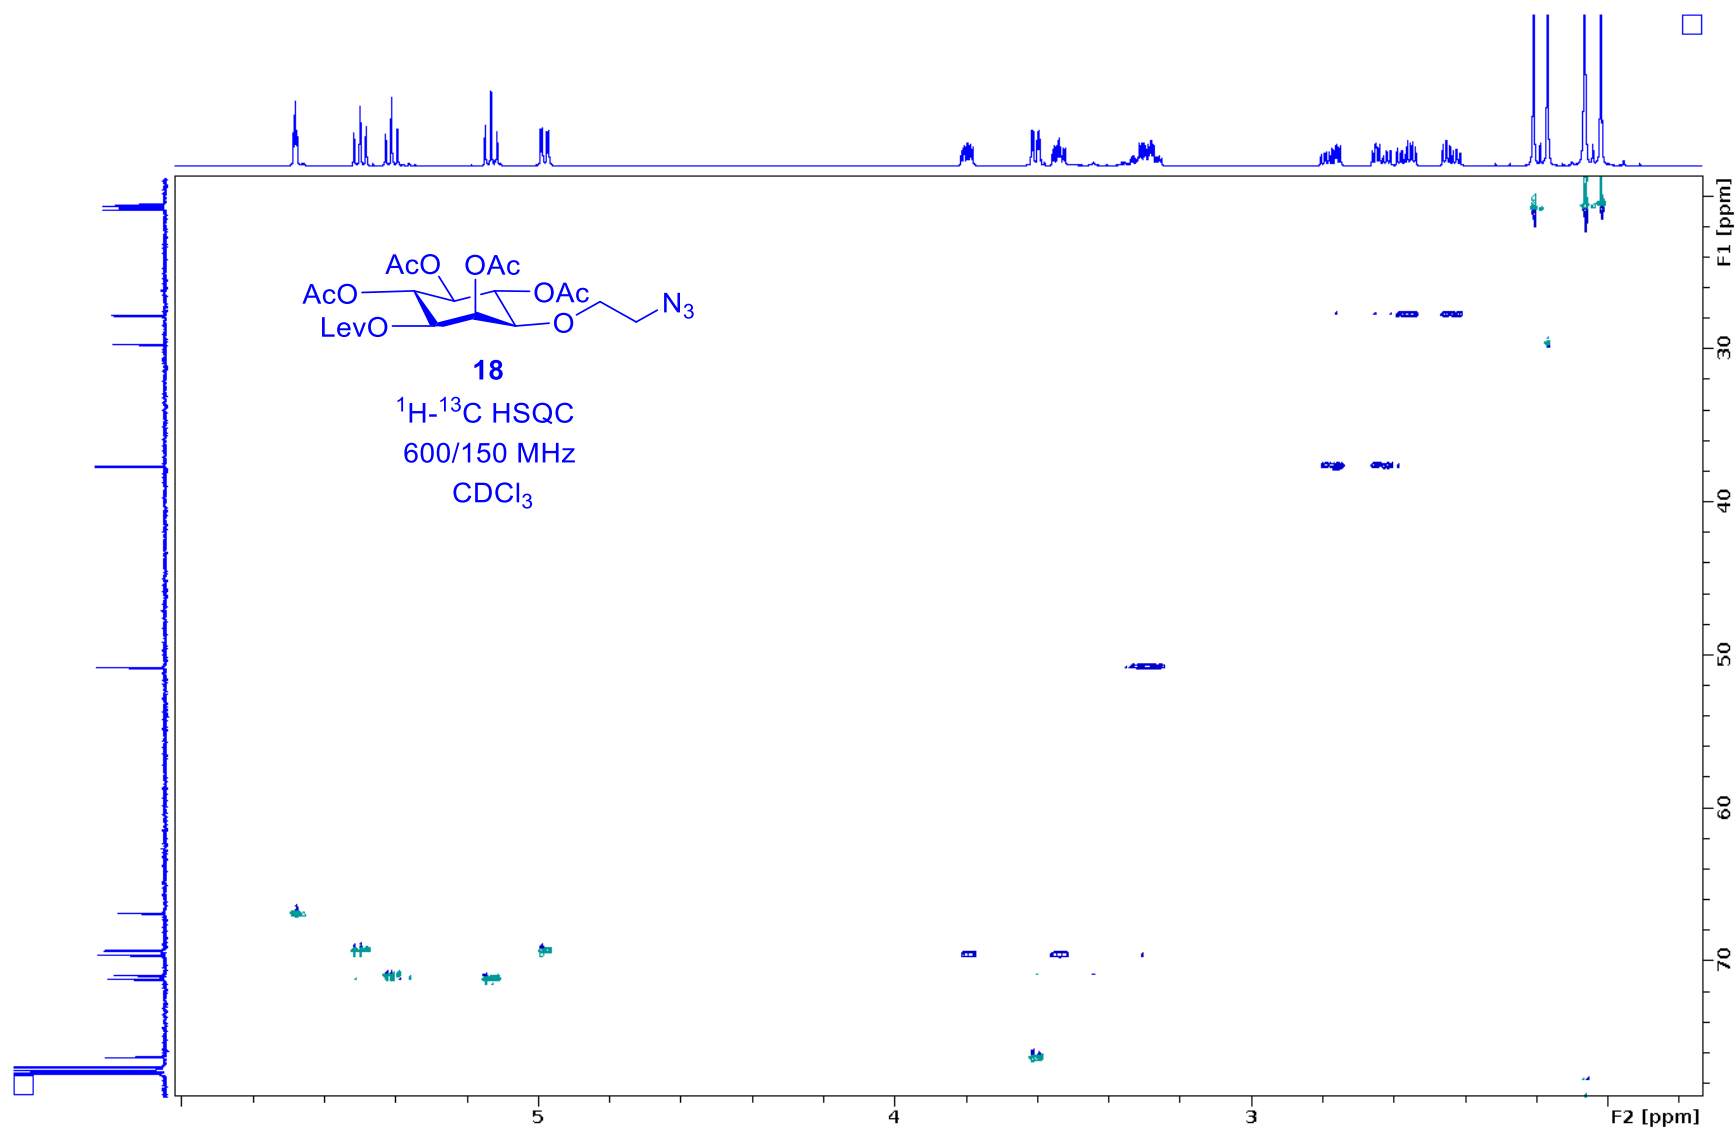

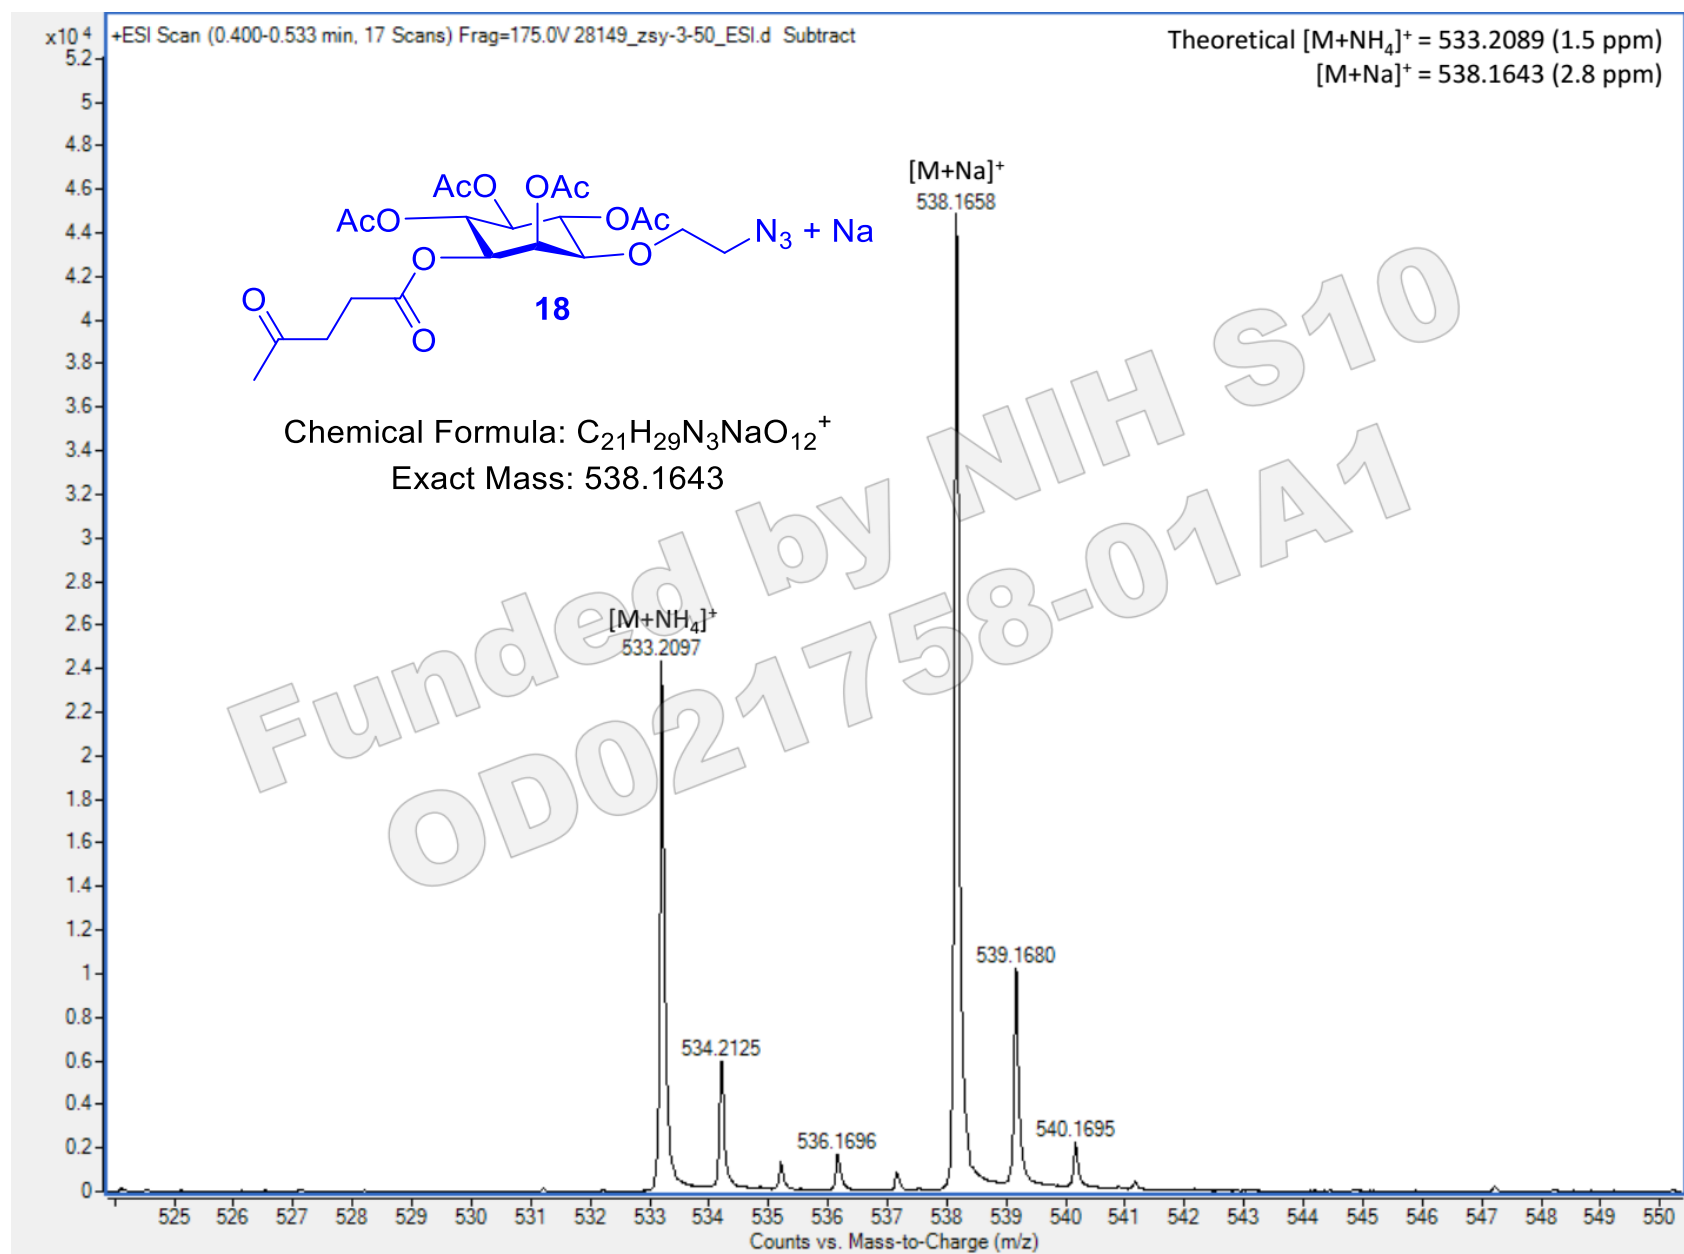





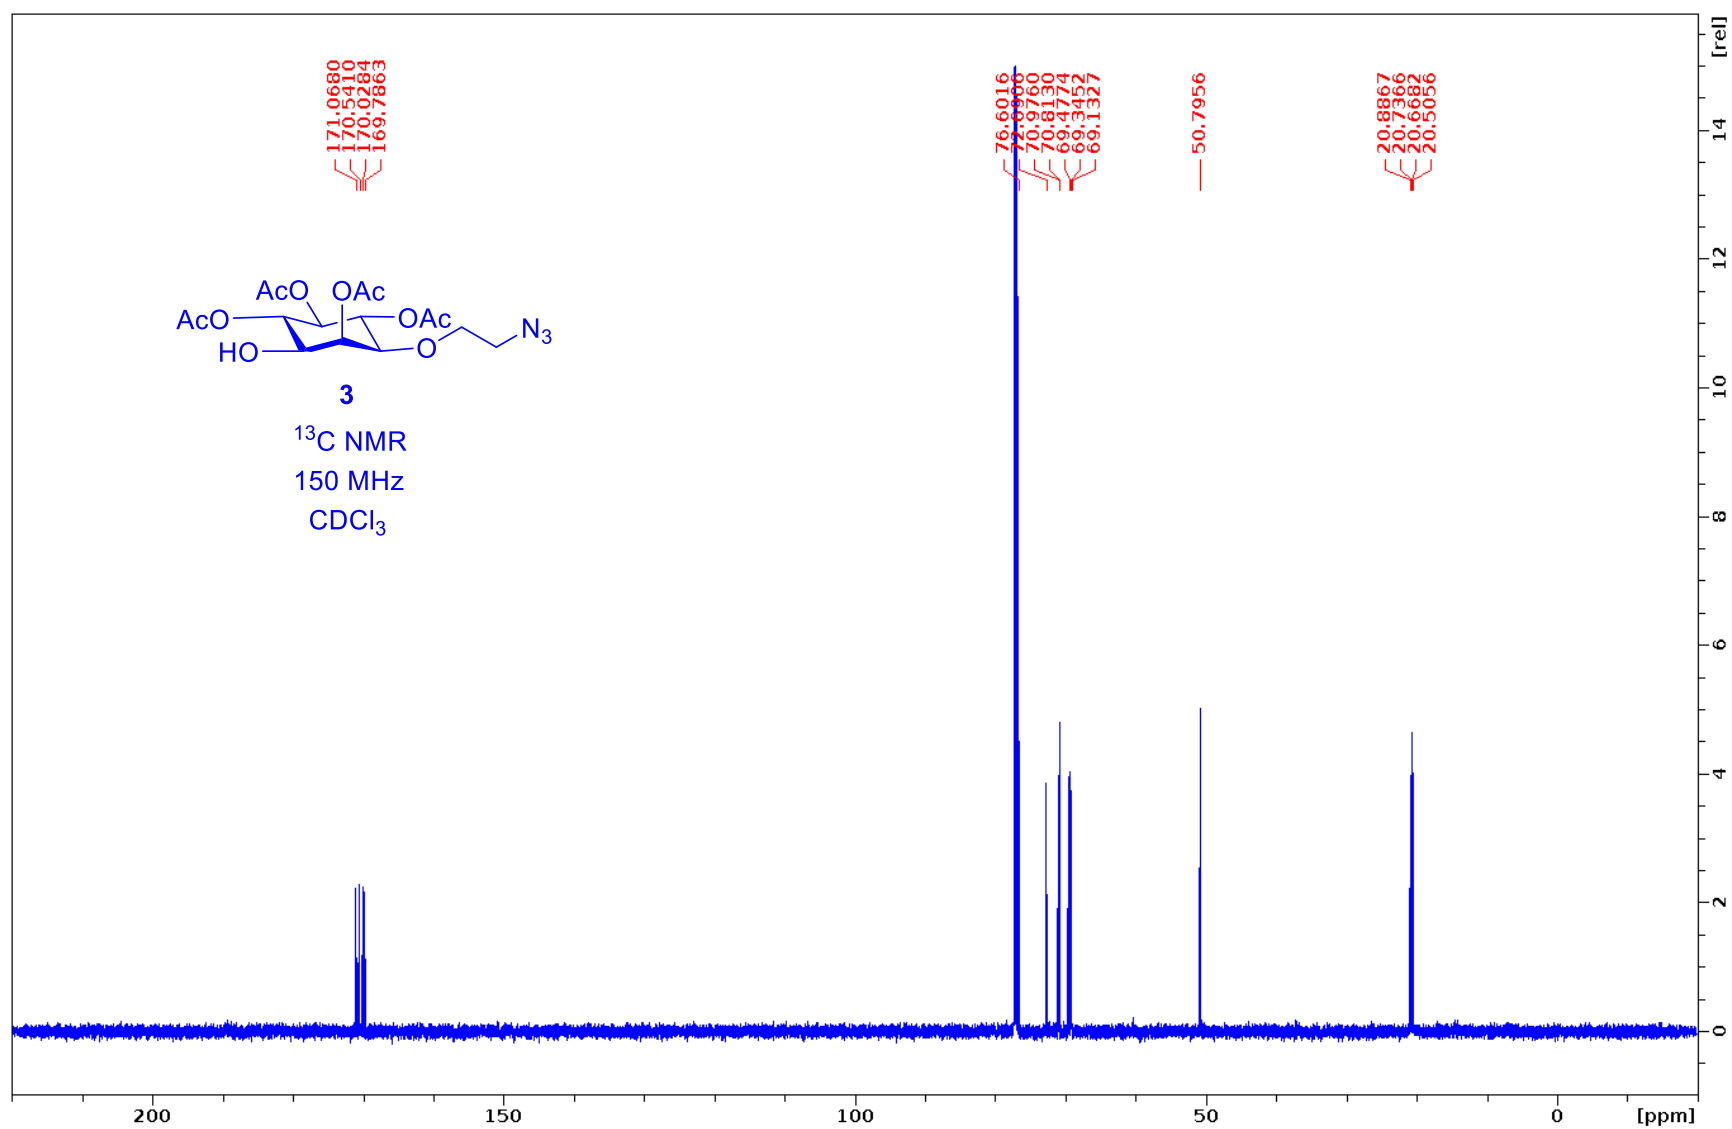

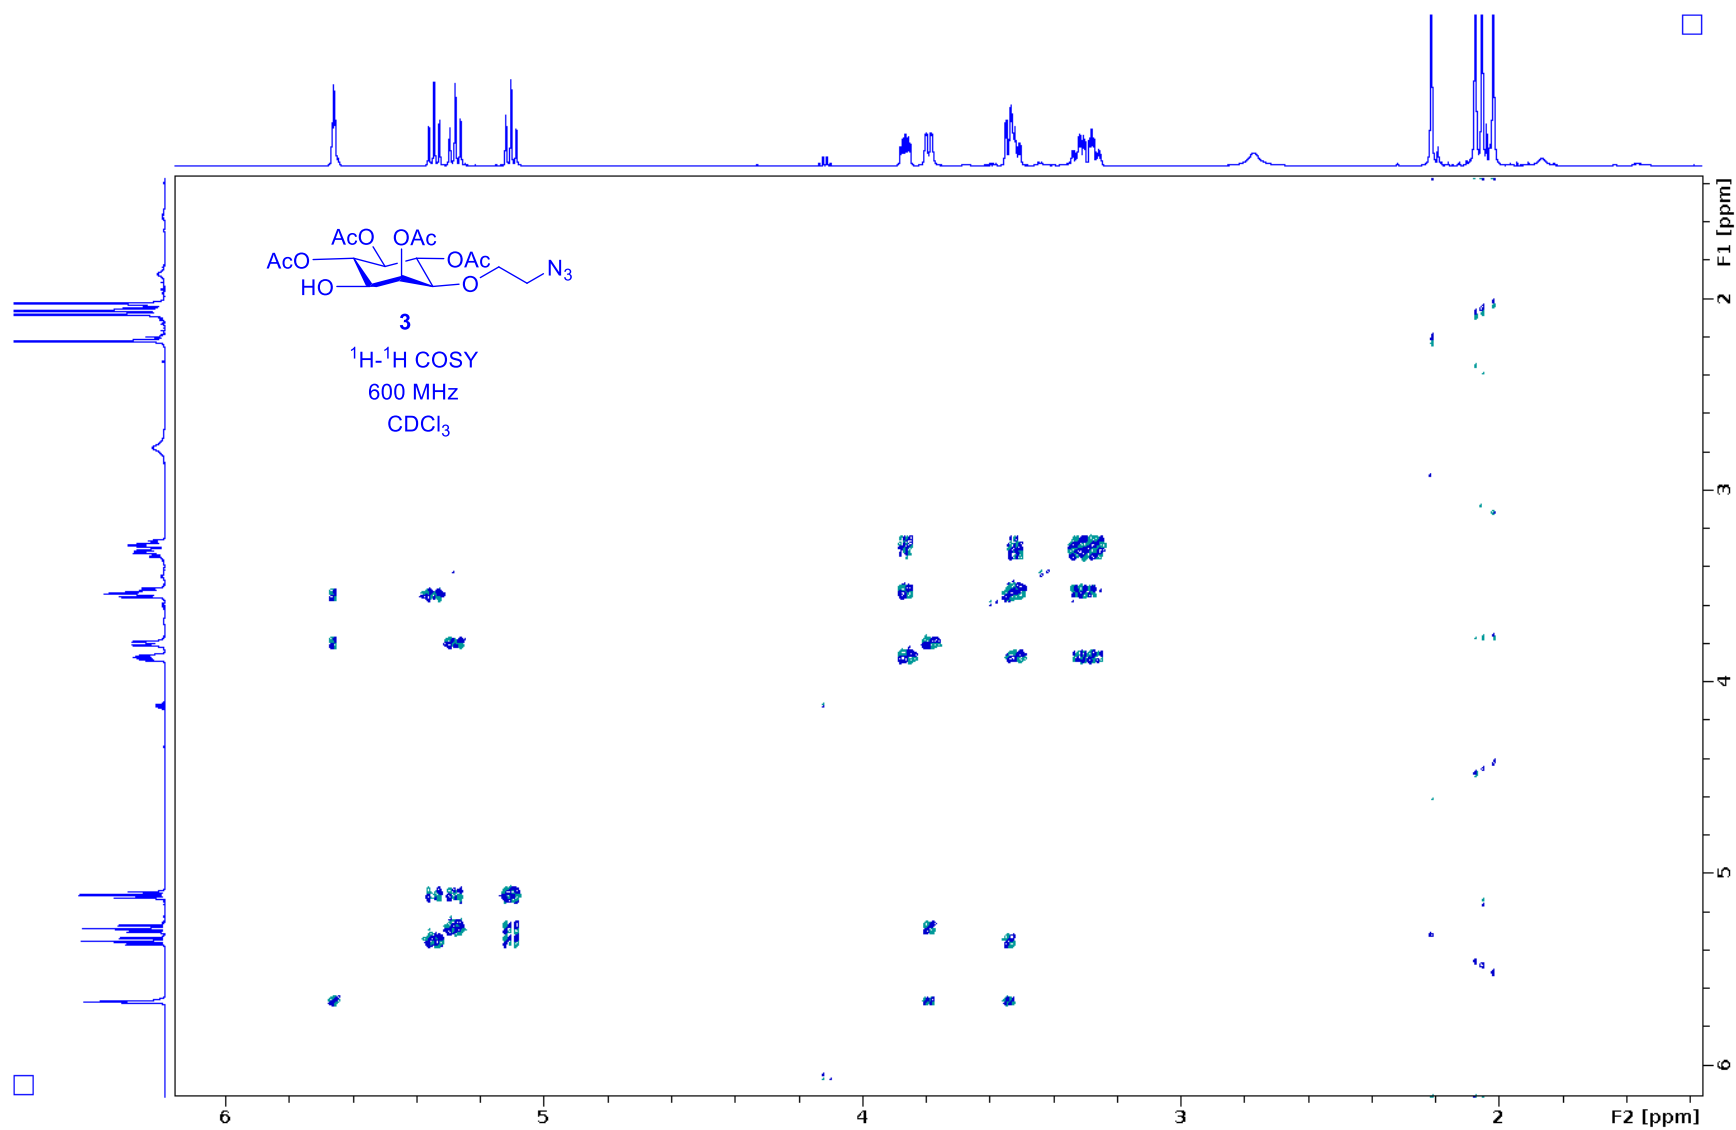

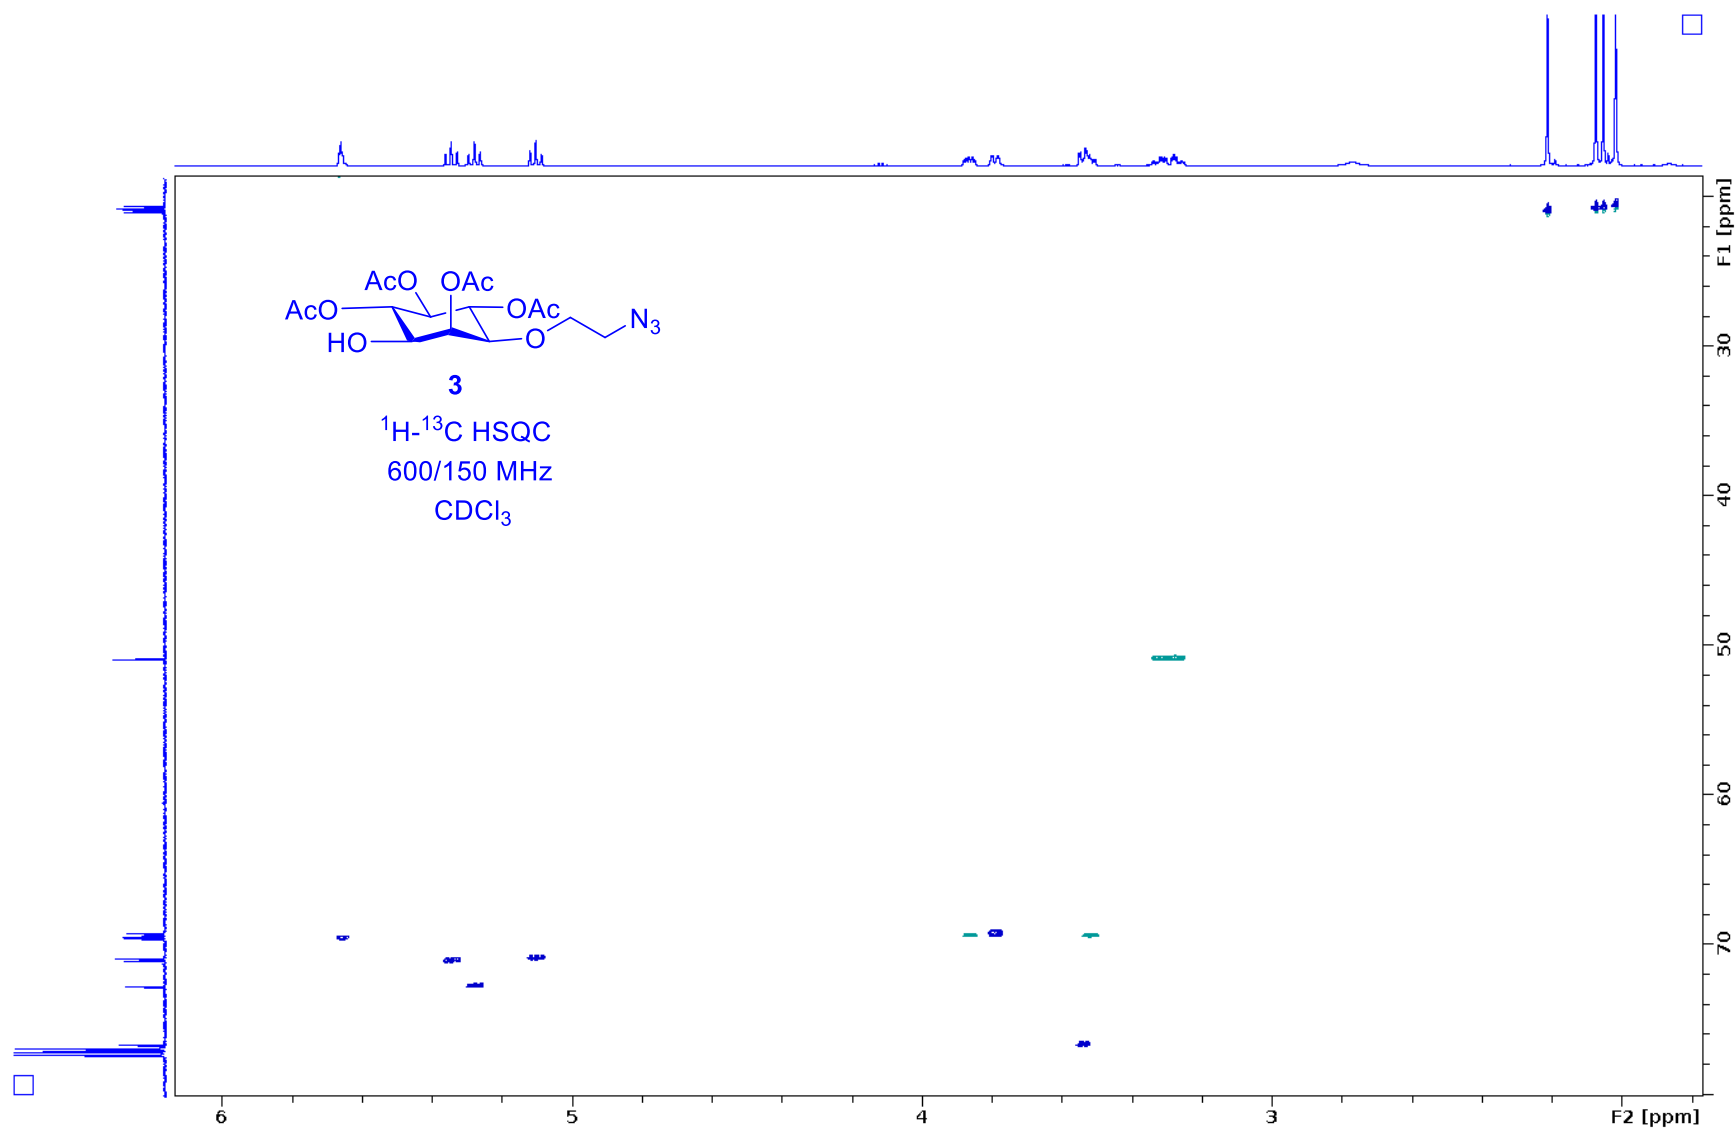

x10<sup>4</sup> +ESI Scan (0.242-0.691 min, 55 Scans) Frag=175.0V 28146\_zsy-3-51\_ESI.d Subtract

Theoretical [M+NH<sub>4</sub>]<sup>+</sup> = 435.1722 (0.9 ppm)

[M+Na]<sup>+</sup> = 440.1276 (3.4 ppm)

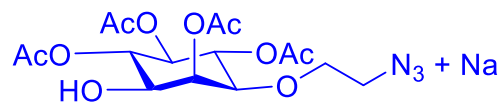

3

Chemical Formula: C<sub>16</sub>H<sub>23</sub>N<sub>3</sub>NaO<sub>10</sub><sup>+</sup>

Exact Mass: 440.1276

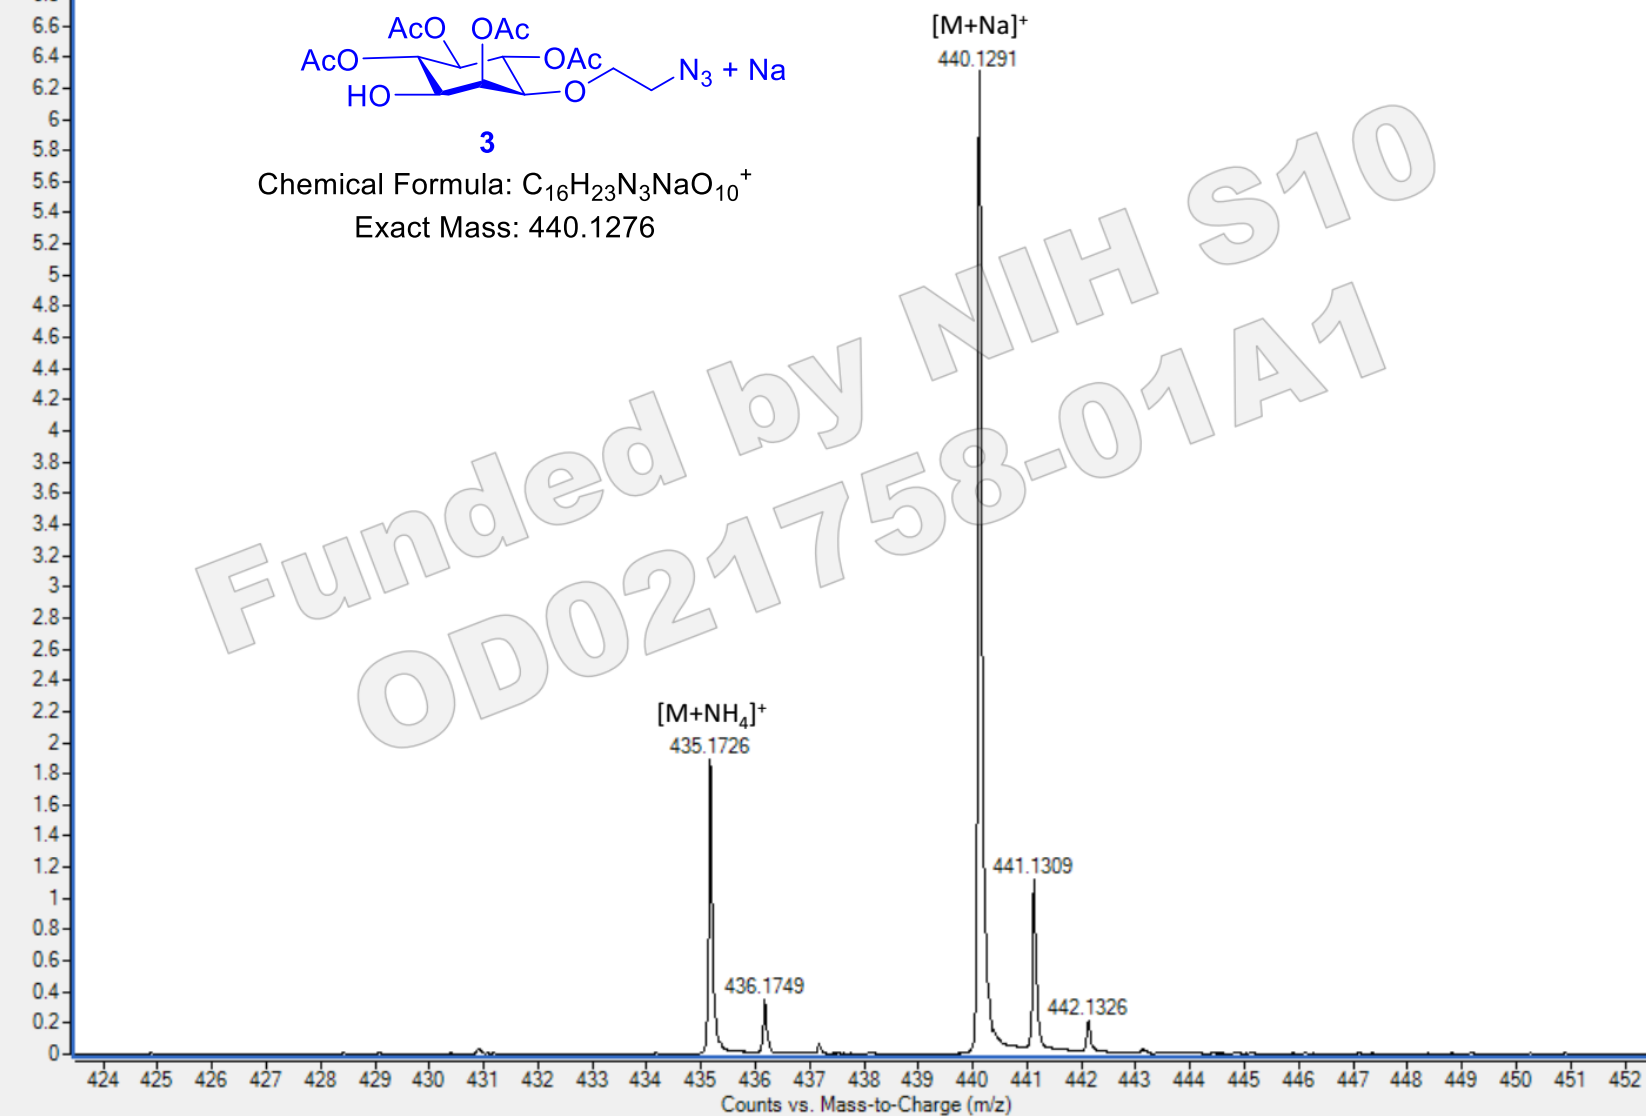

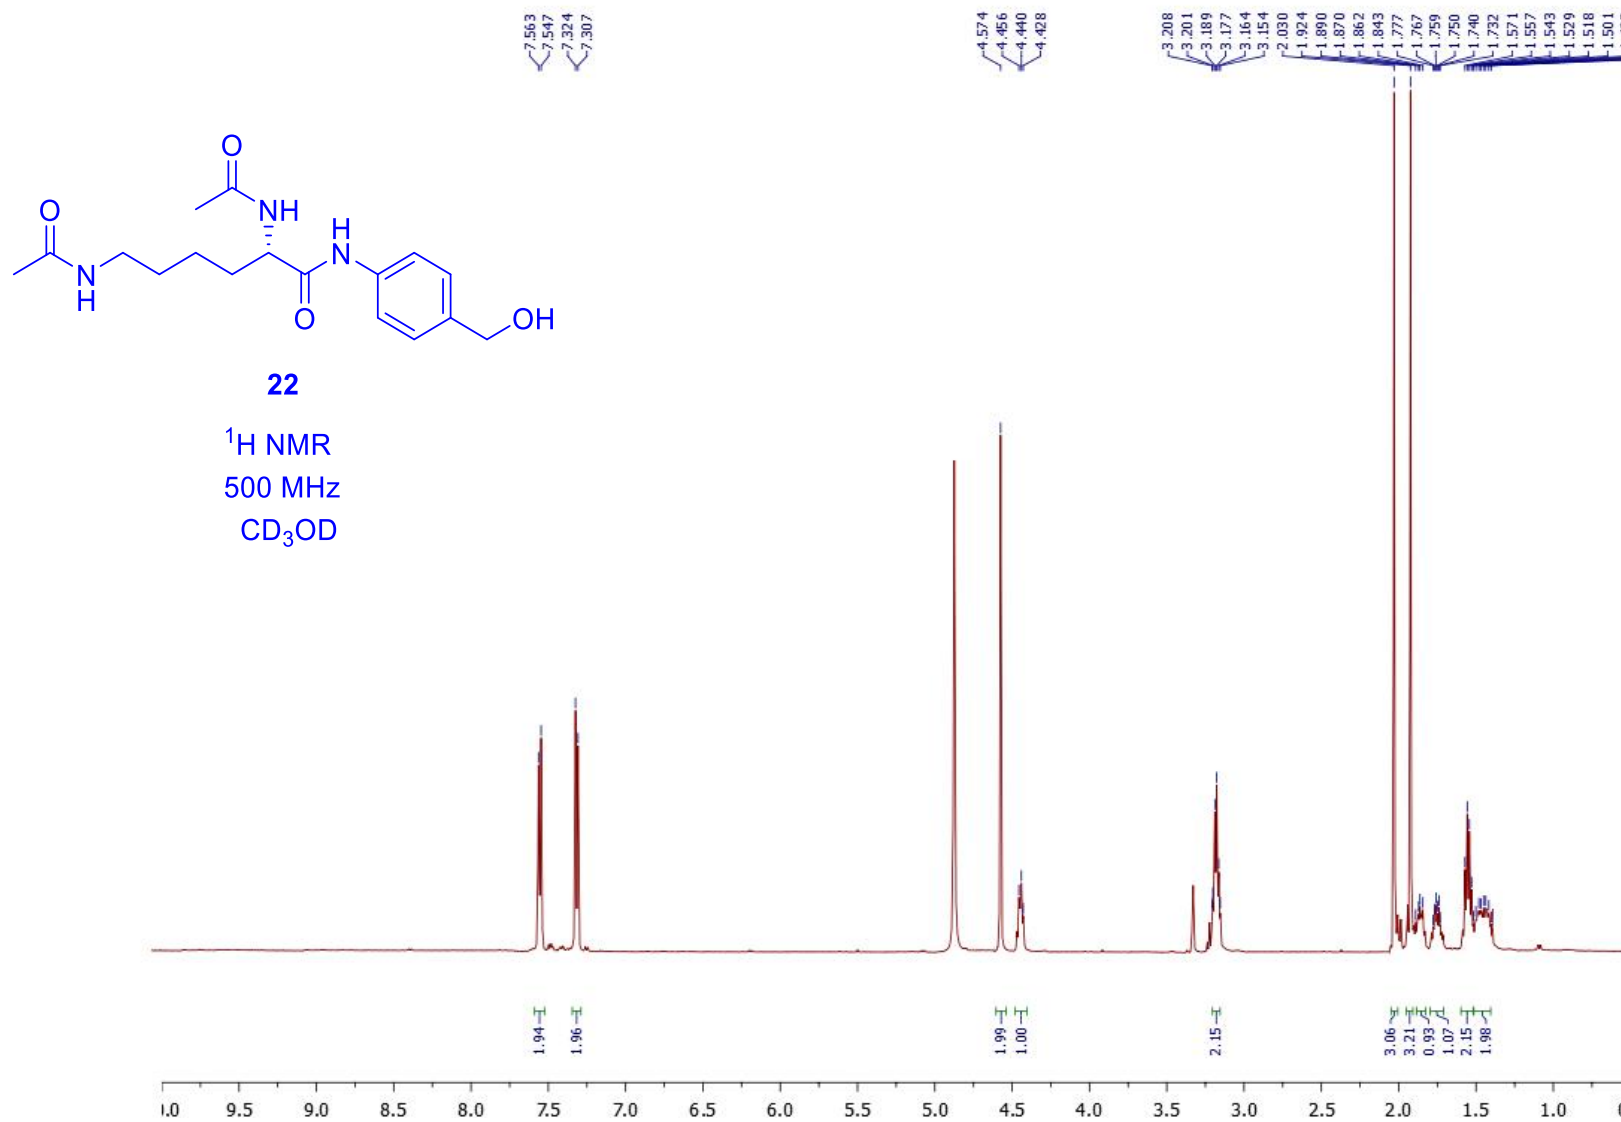

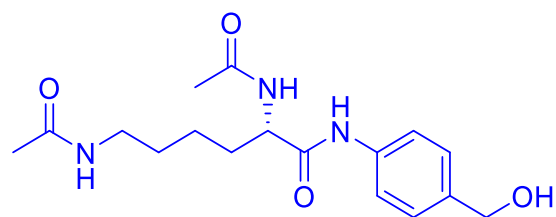

**22**

$^{13}\text{C}$  NMR  
125 MHz  
 $\text{CD}_3\text{OD}$

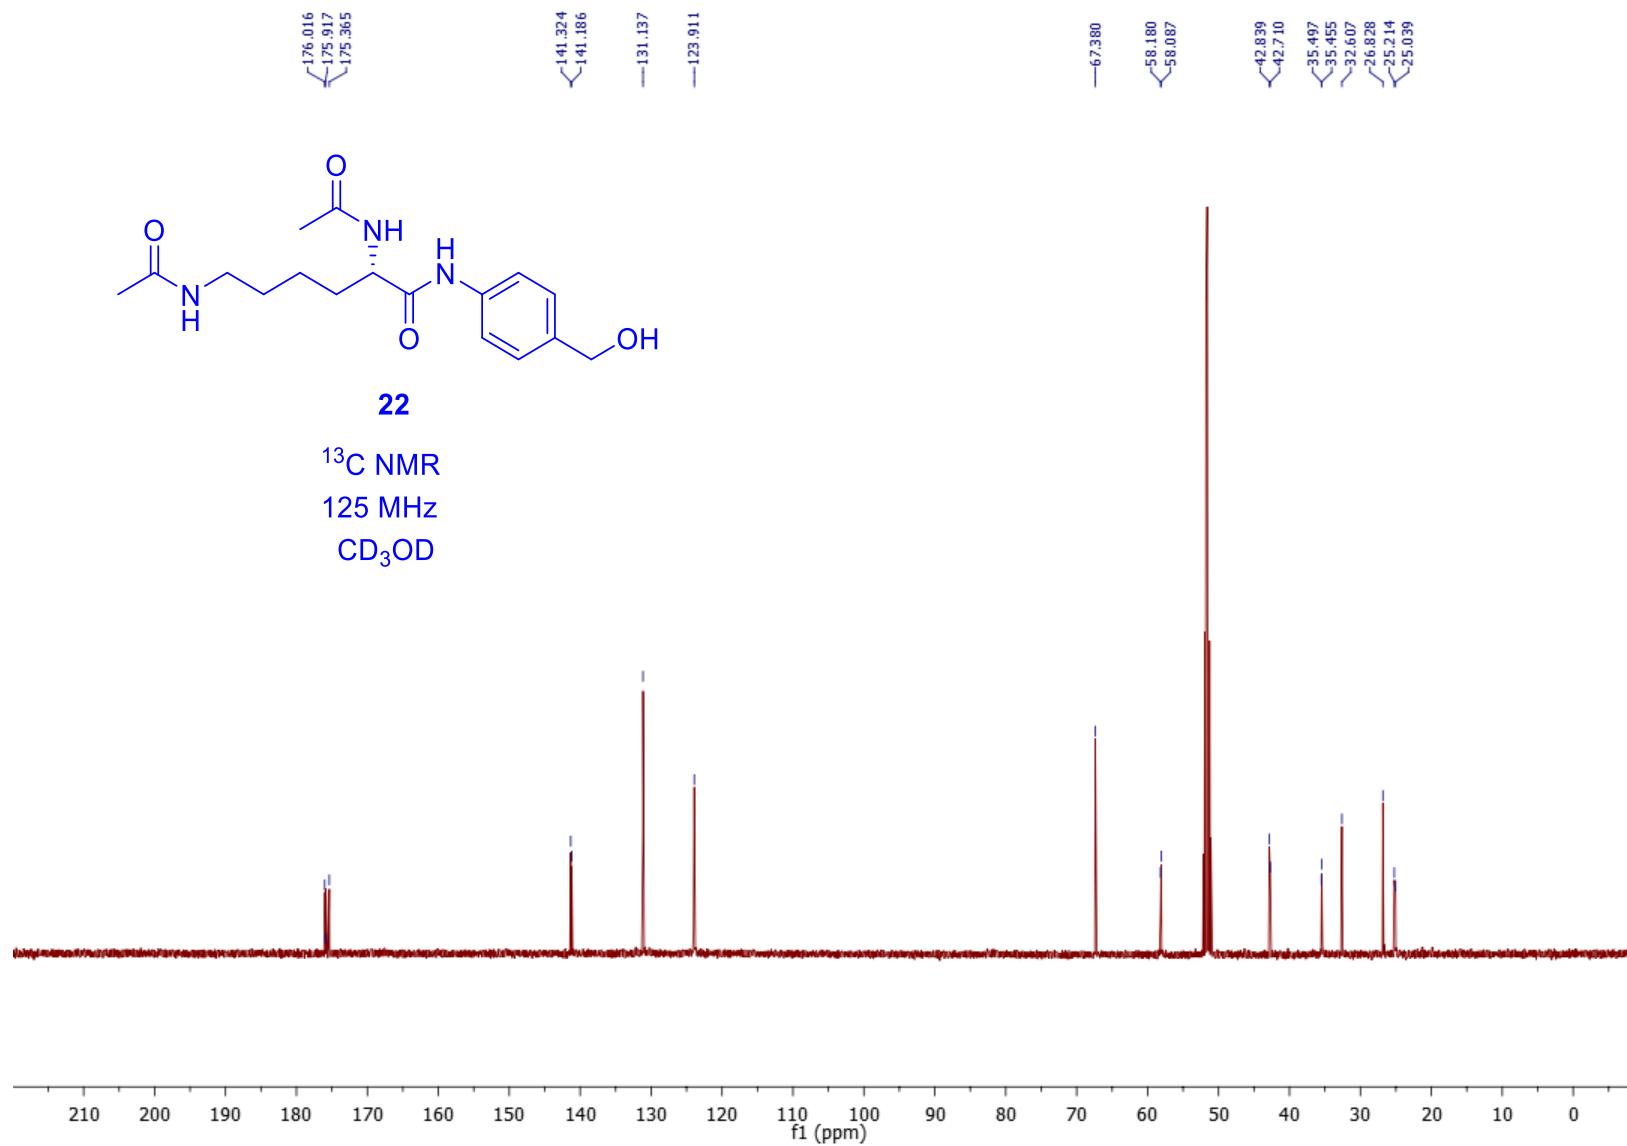

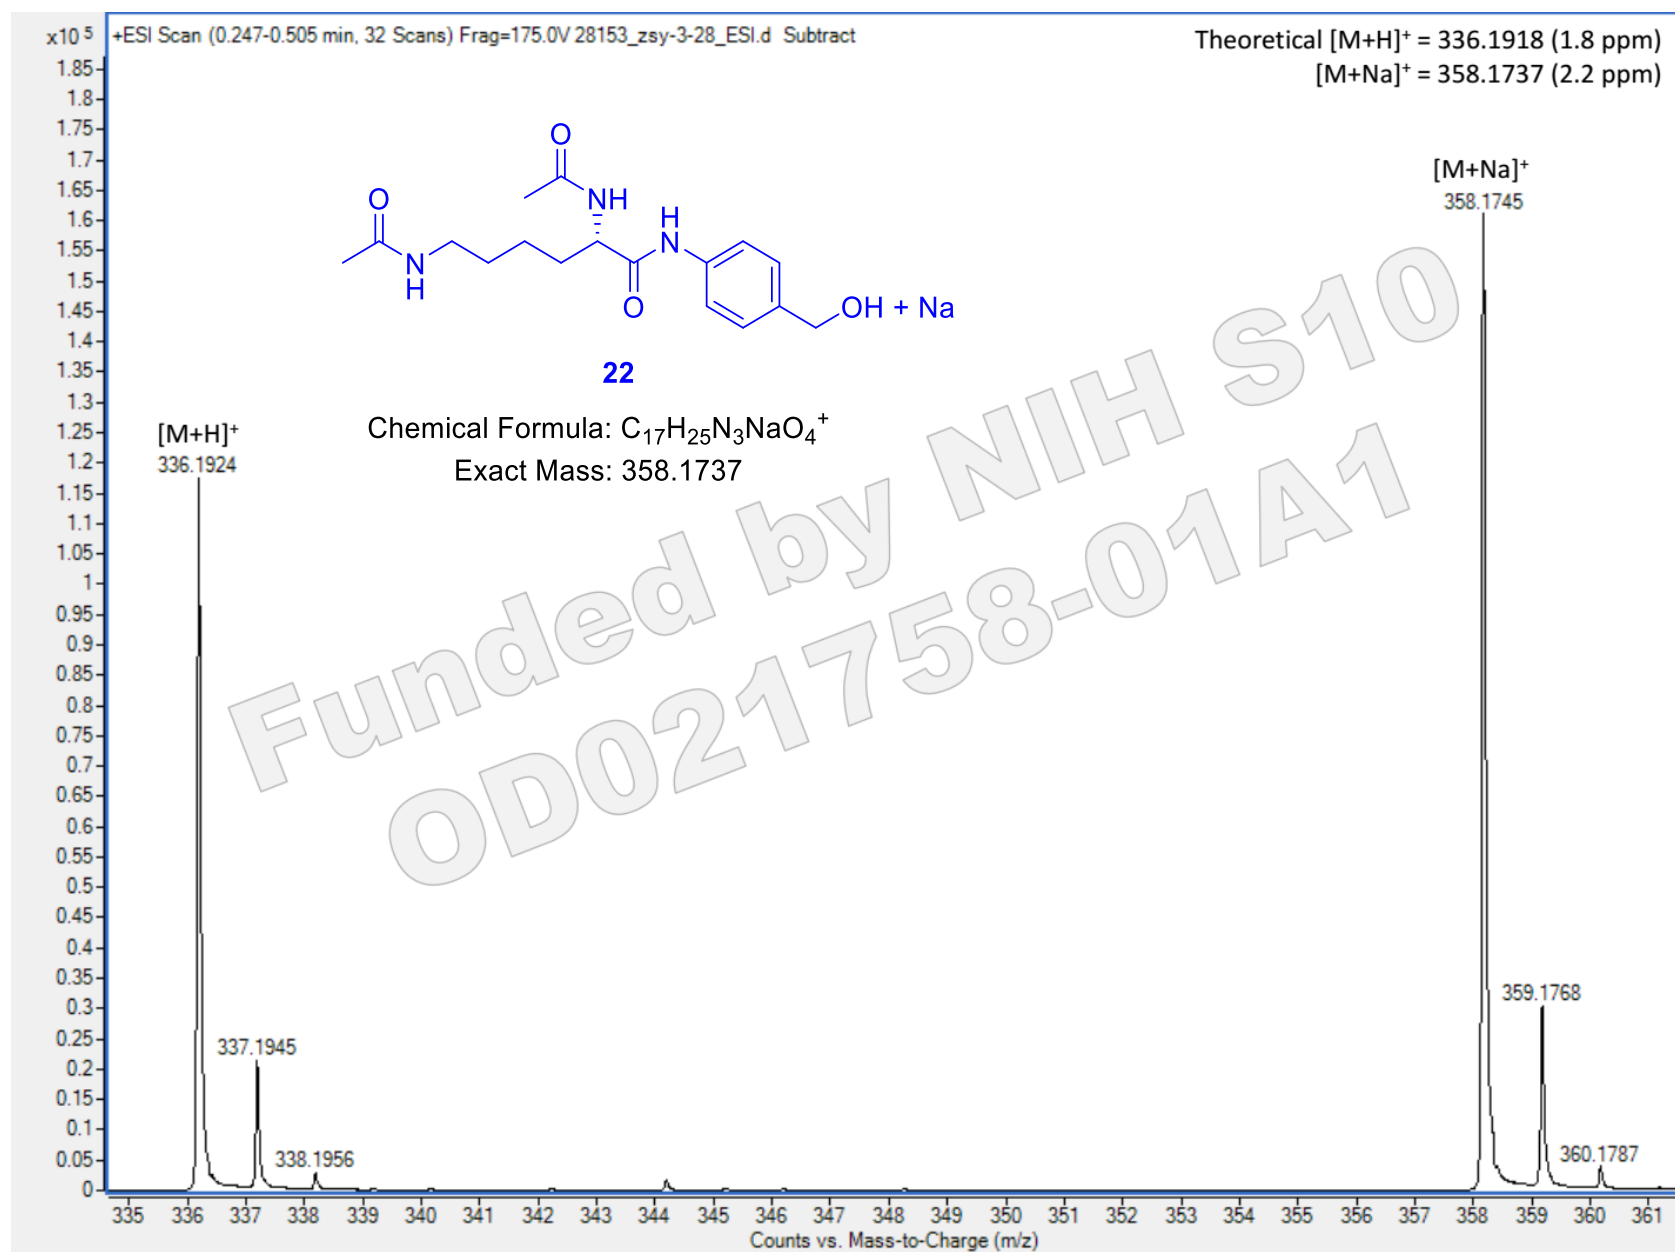



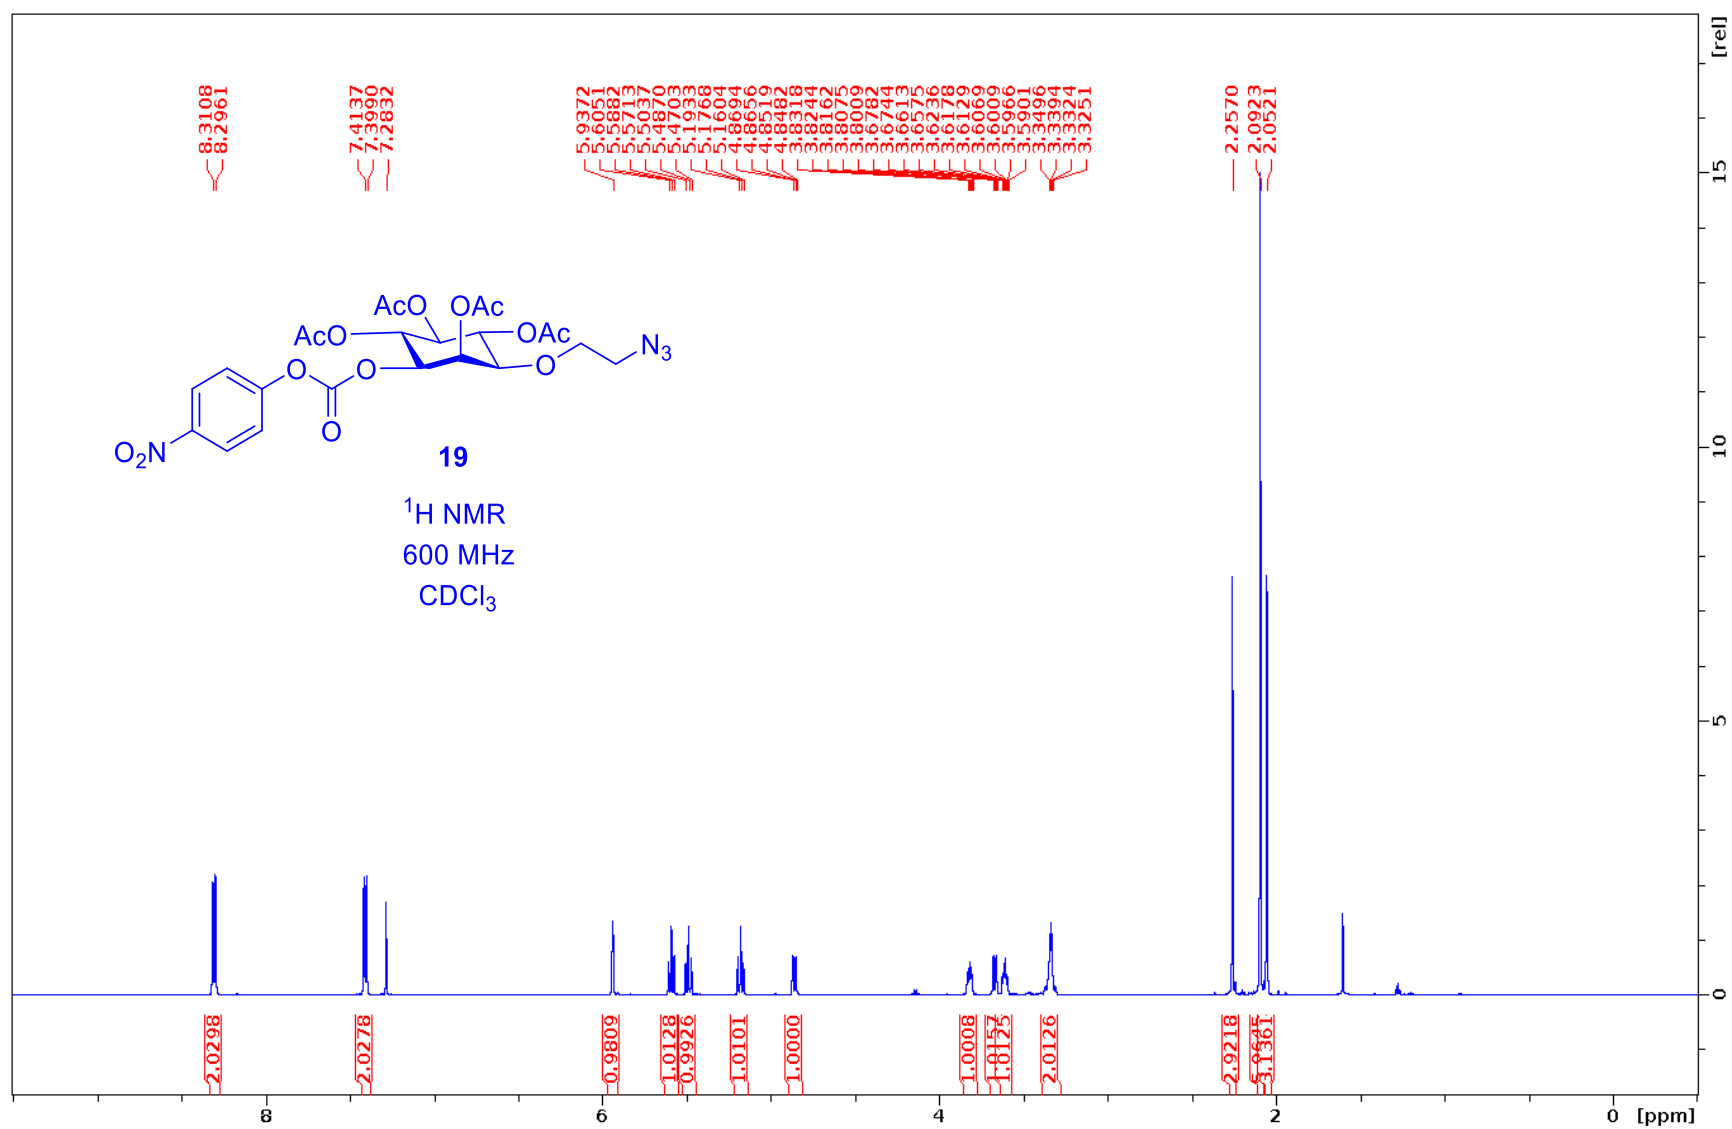

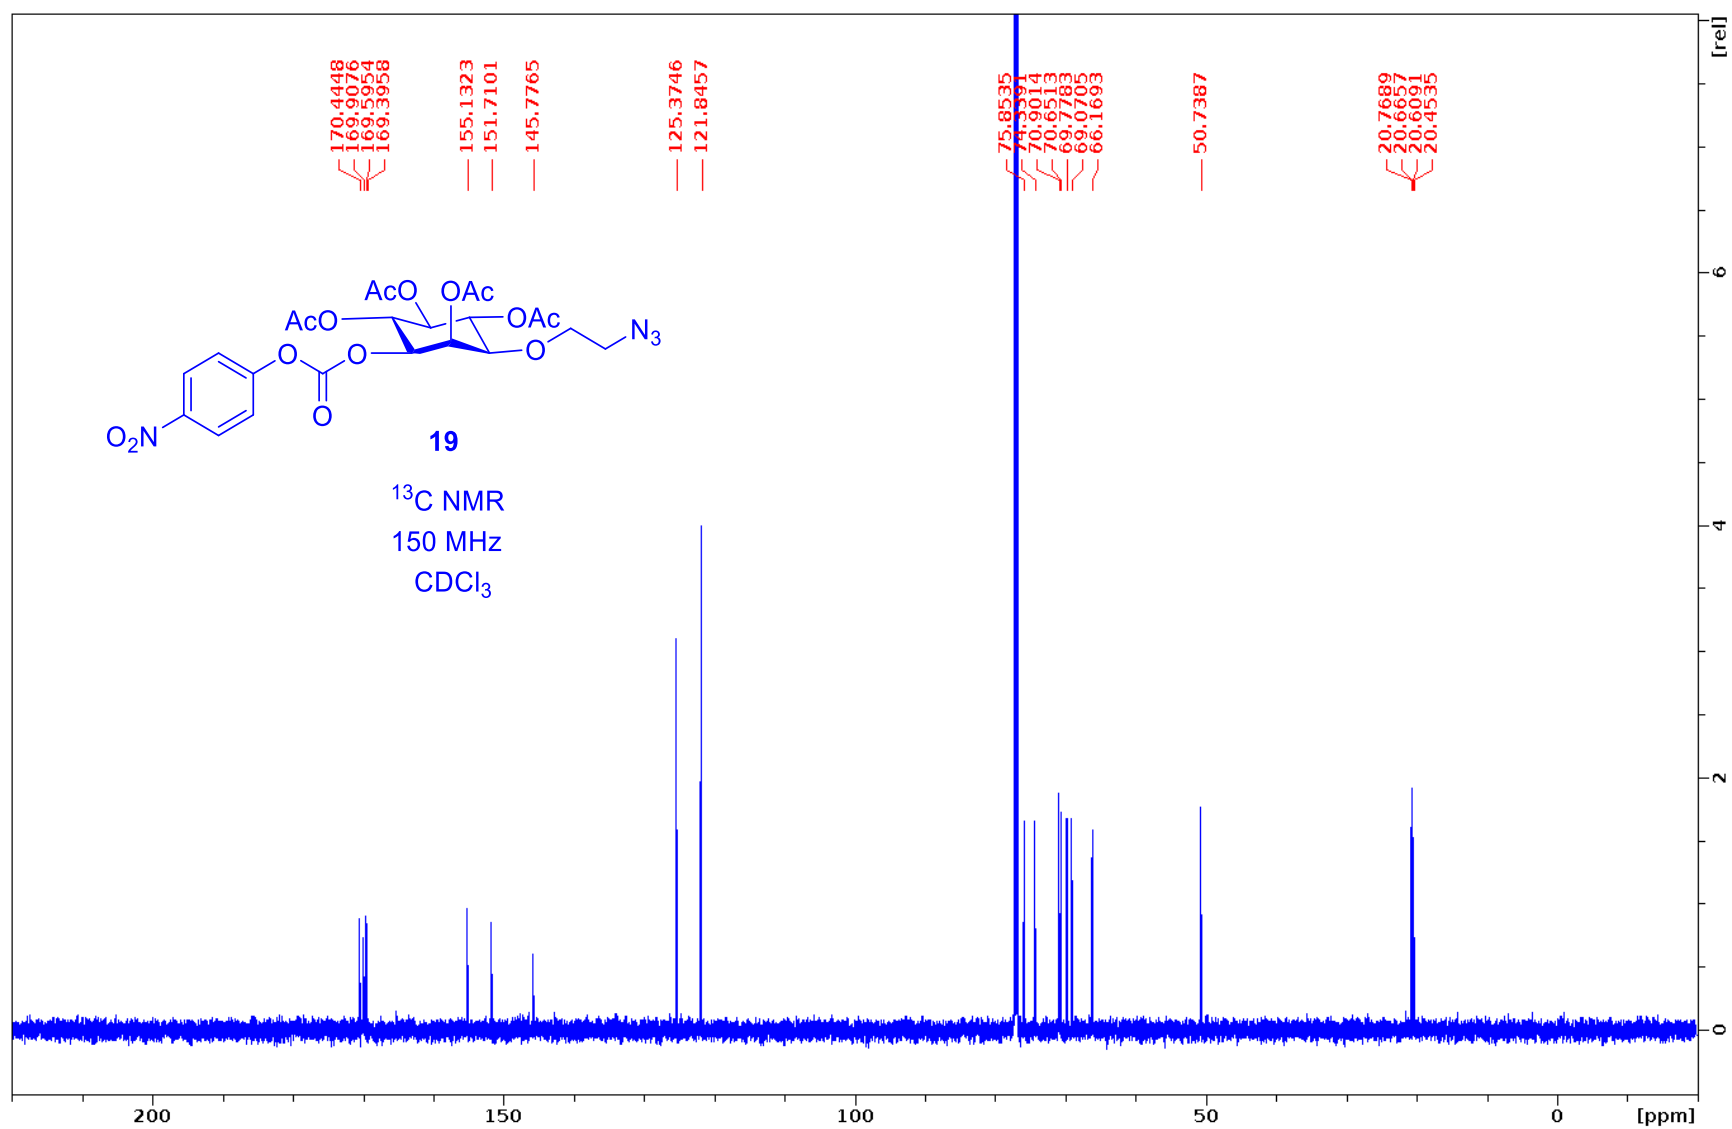

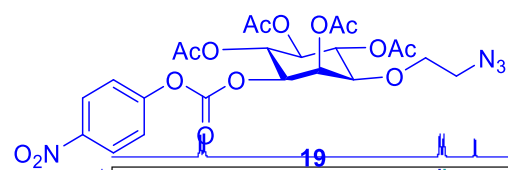

<sup>1</sup>H-<sup>1</sup>H COSY  
600 MHz  
CDCl<sub>3</sub>

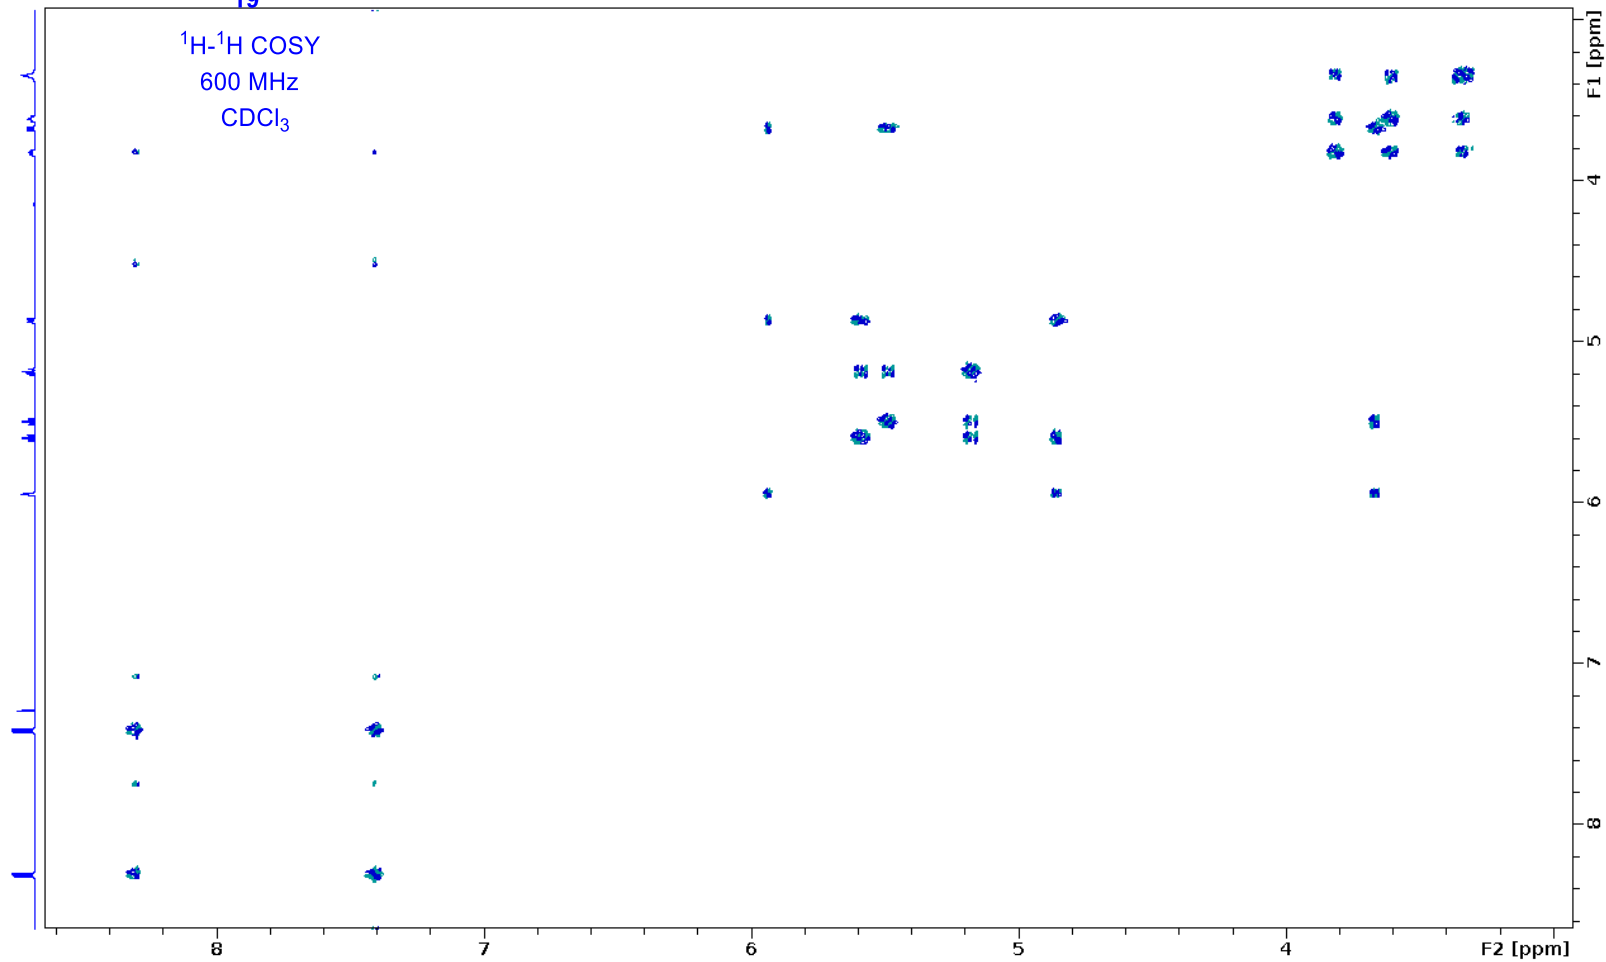

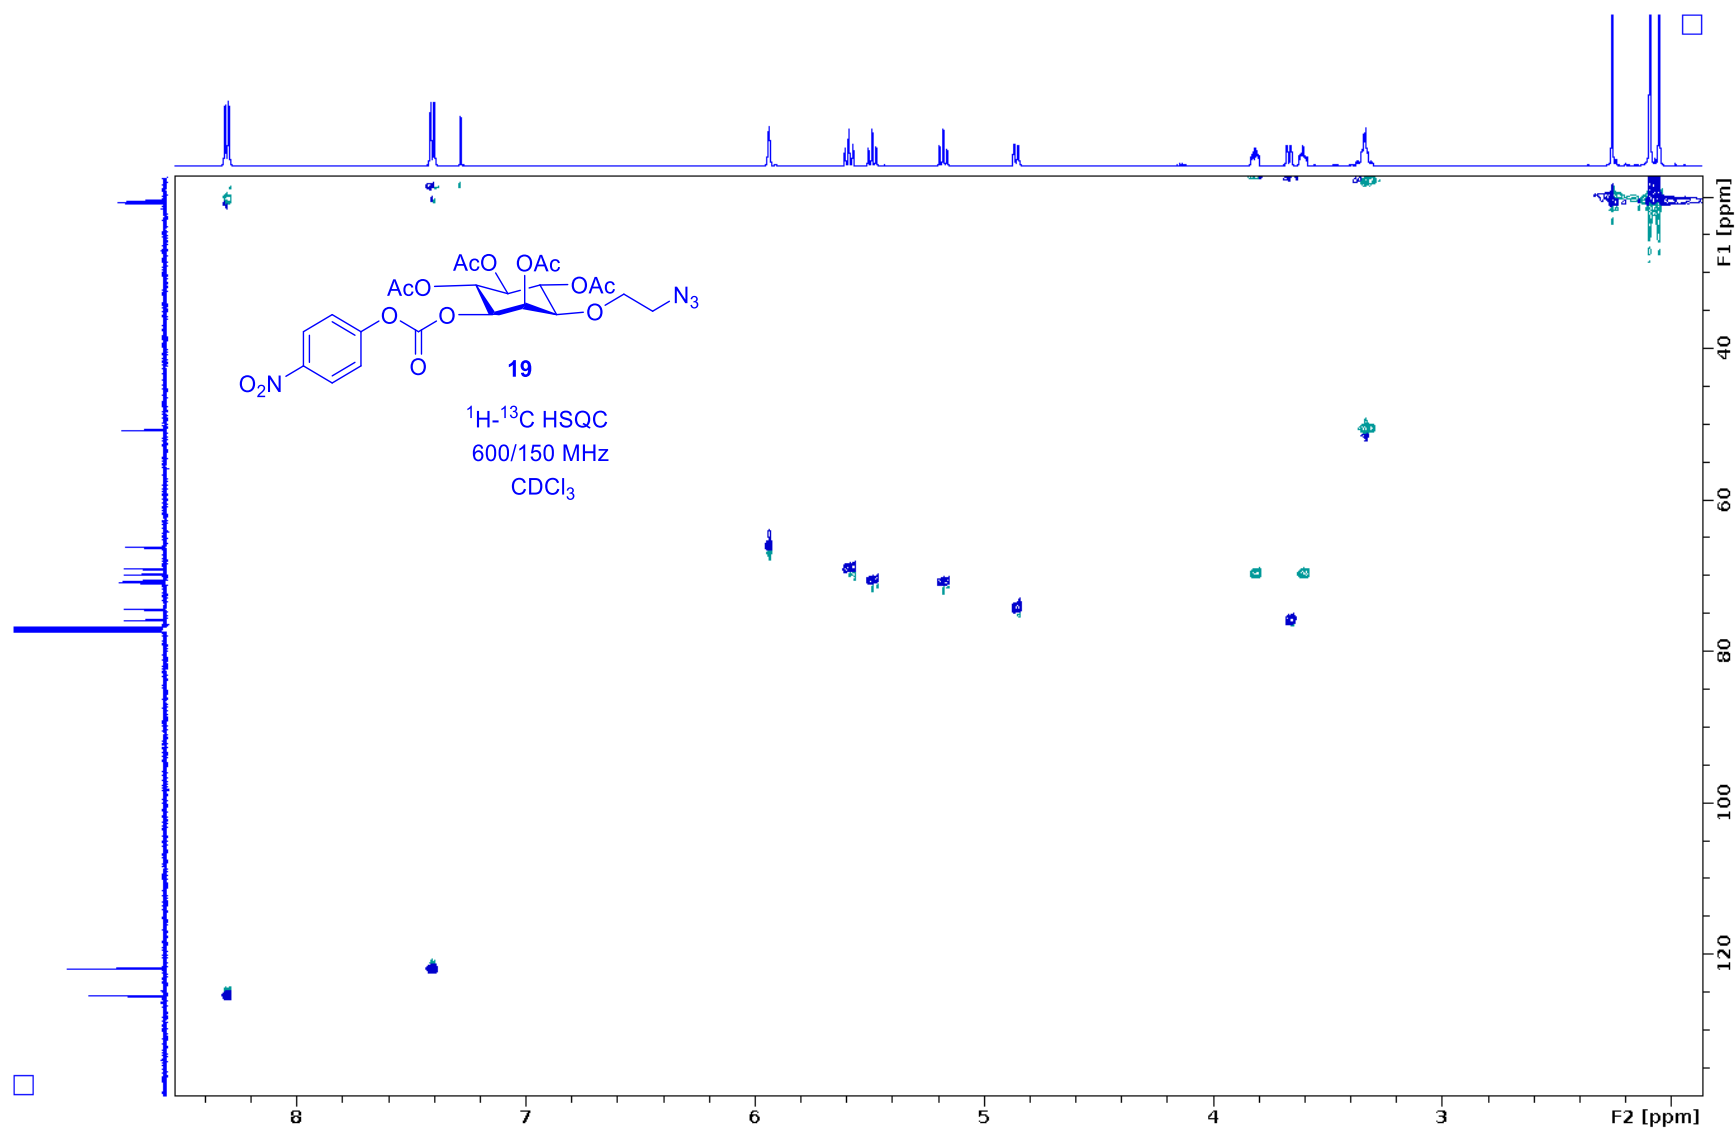

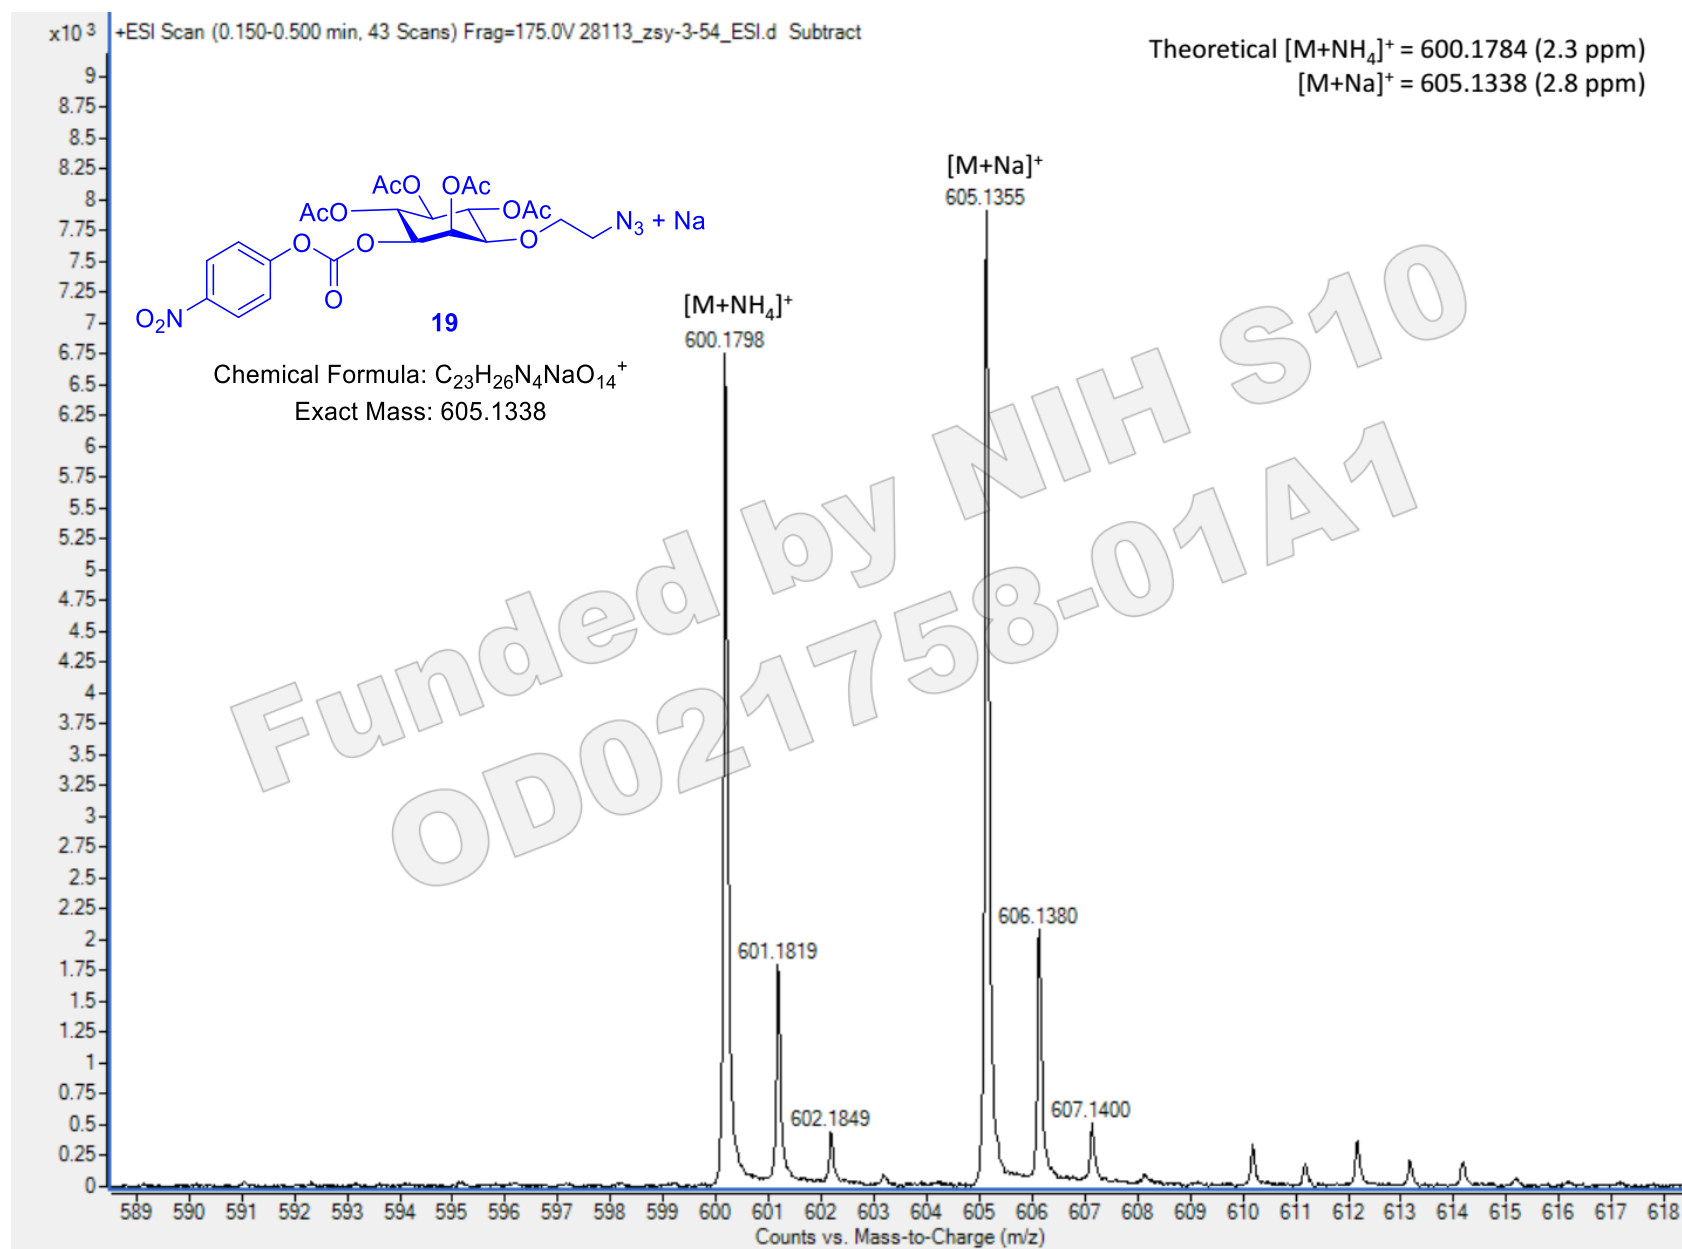

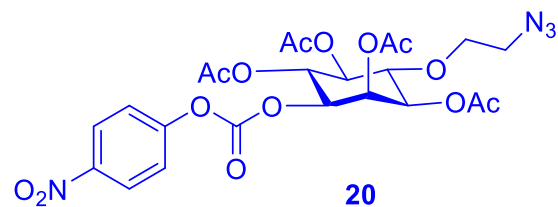

**20**  
<sup>1</sup>H NMR  
 600 MHz  
 CDCl<sub>3</sub>

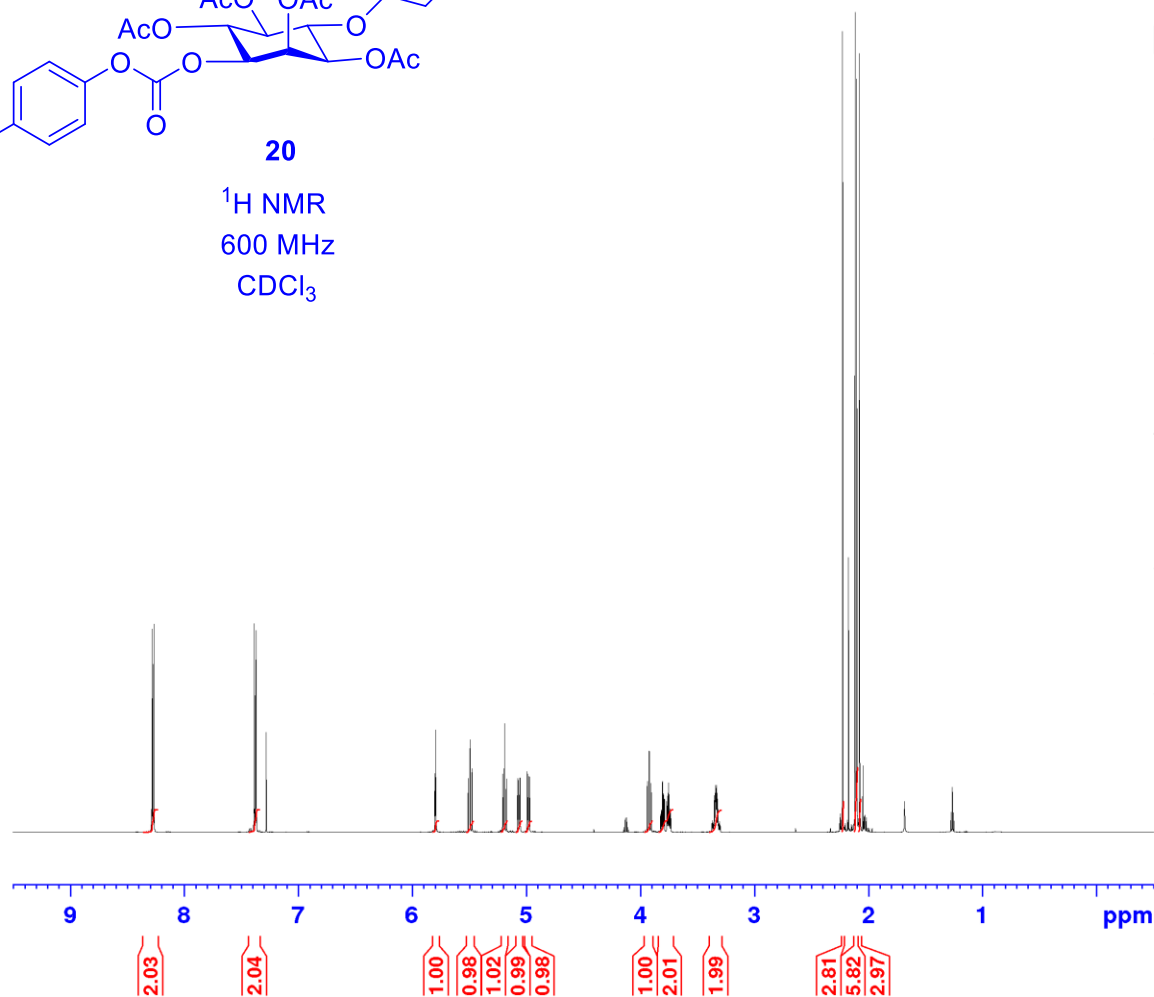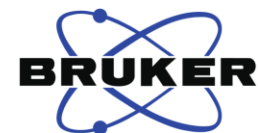

Current Data Parameters  
 NAME zsy-3-37  
 EXPNO 1  
 PROCNO 1

F2 - Acquisition Parameters  
 Date\_ 20180413  
 Time 16.09 h  
 INSTRUM spect  
 PROBHD Z847801\_0073 (  
 PULPROG zg30  
 TD 65536  
 SOLVENT CDCl3  
 NS 8  
 DS 0  
 SWH 6009.615 Hz  
 FIDRES 0.183399 Hz  
 AQ 5.4525952 sec  
 RG 114  
 DW 83.200 usec  
 DE 6.50 usec  
 TE 302.0 K  
 D1 1.00000000 sec  
 TD0 1  
 SFO1 600.1627007 MHz  
 NUC1 1H  
 P1 14.00 usec  
 PLW1 15.77099991 W

F2 - Processing parameters  
 SI 65536  
 SF 600.1600000 MHz  
 WDW EM  
 SSB 0  
 LB 0.30 Hz  
 GB 0  
 PC 1.00

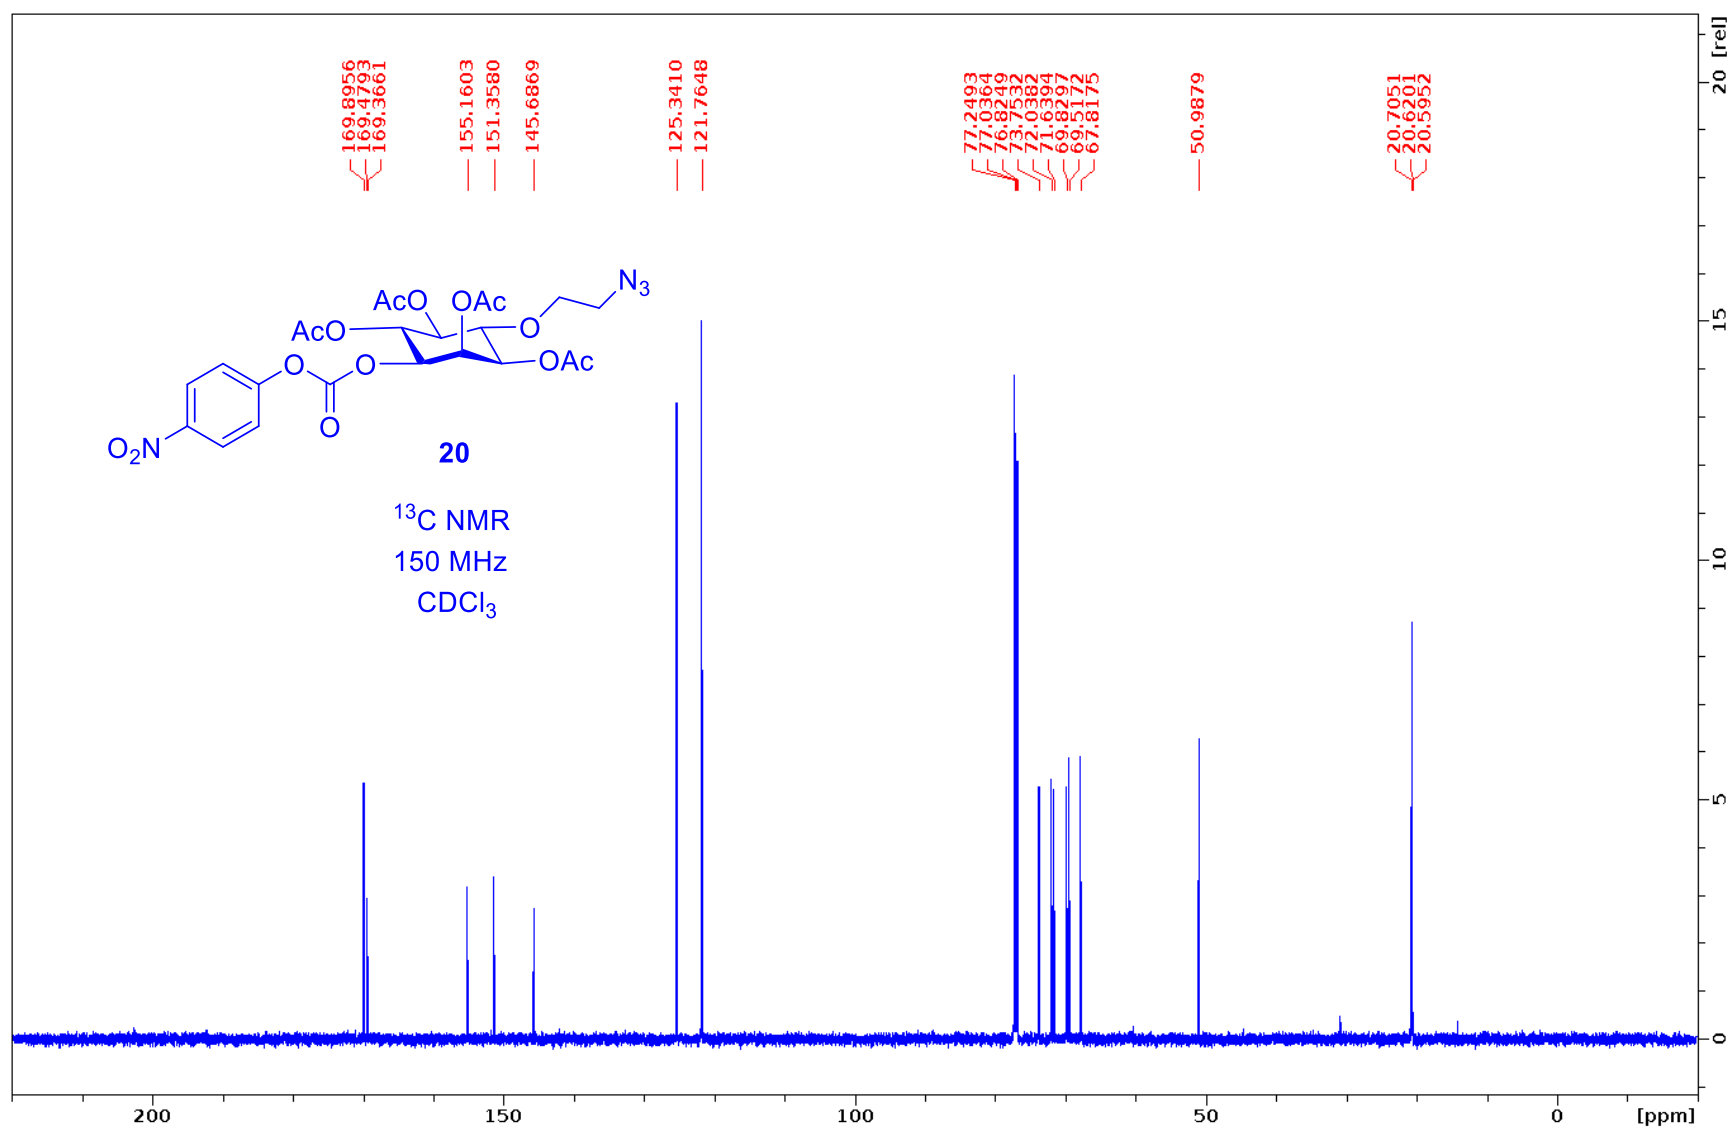

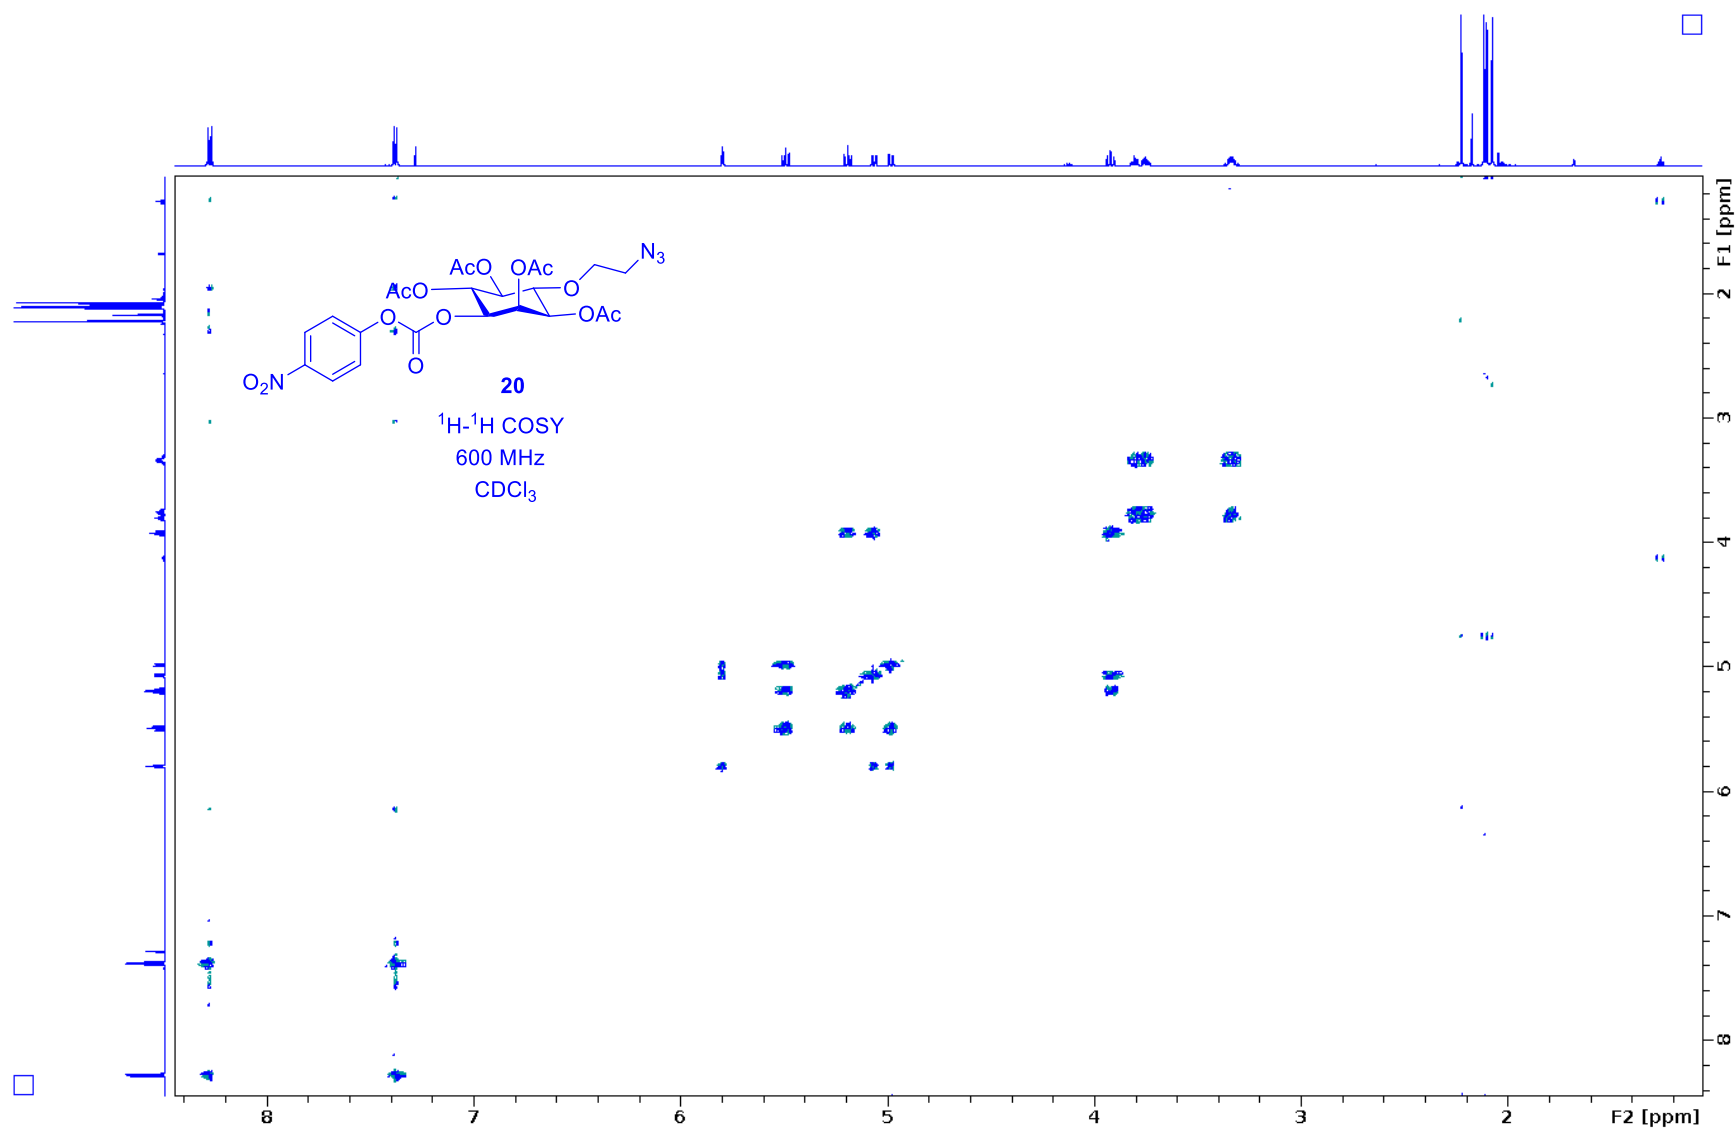



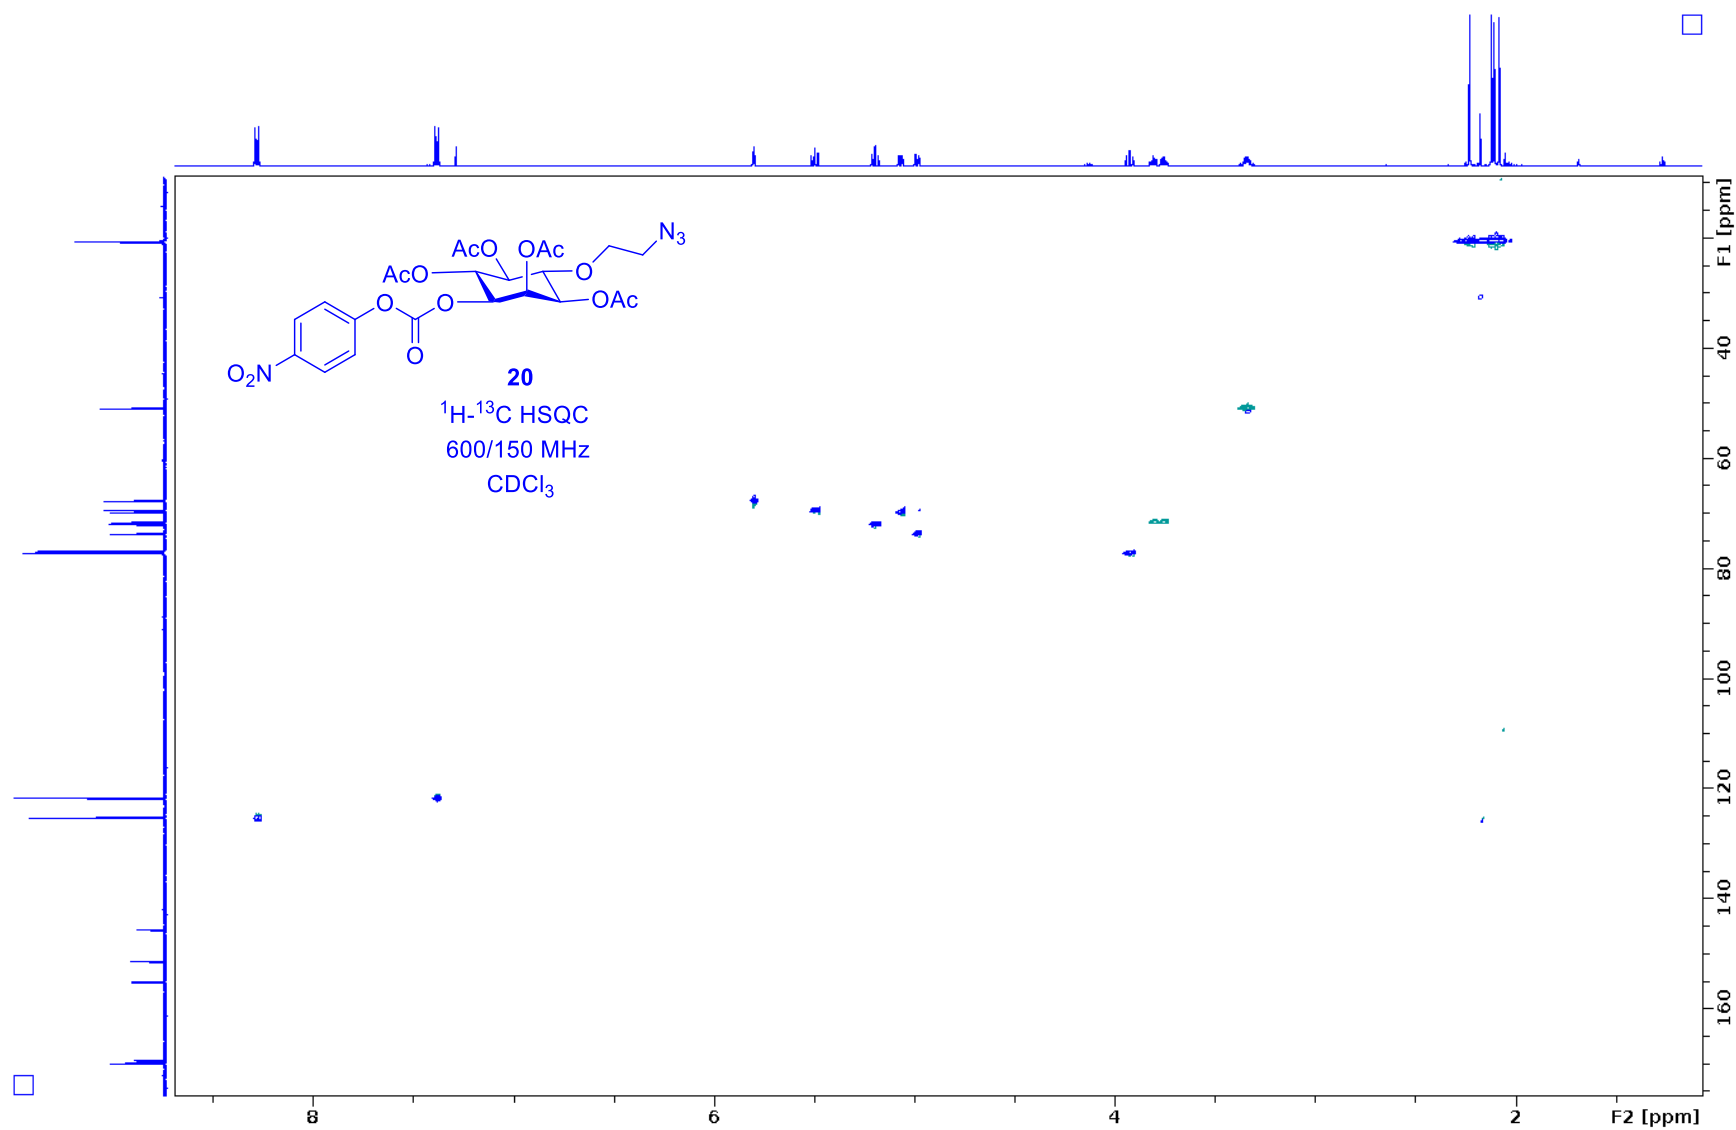

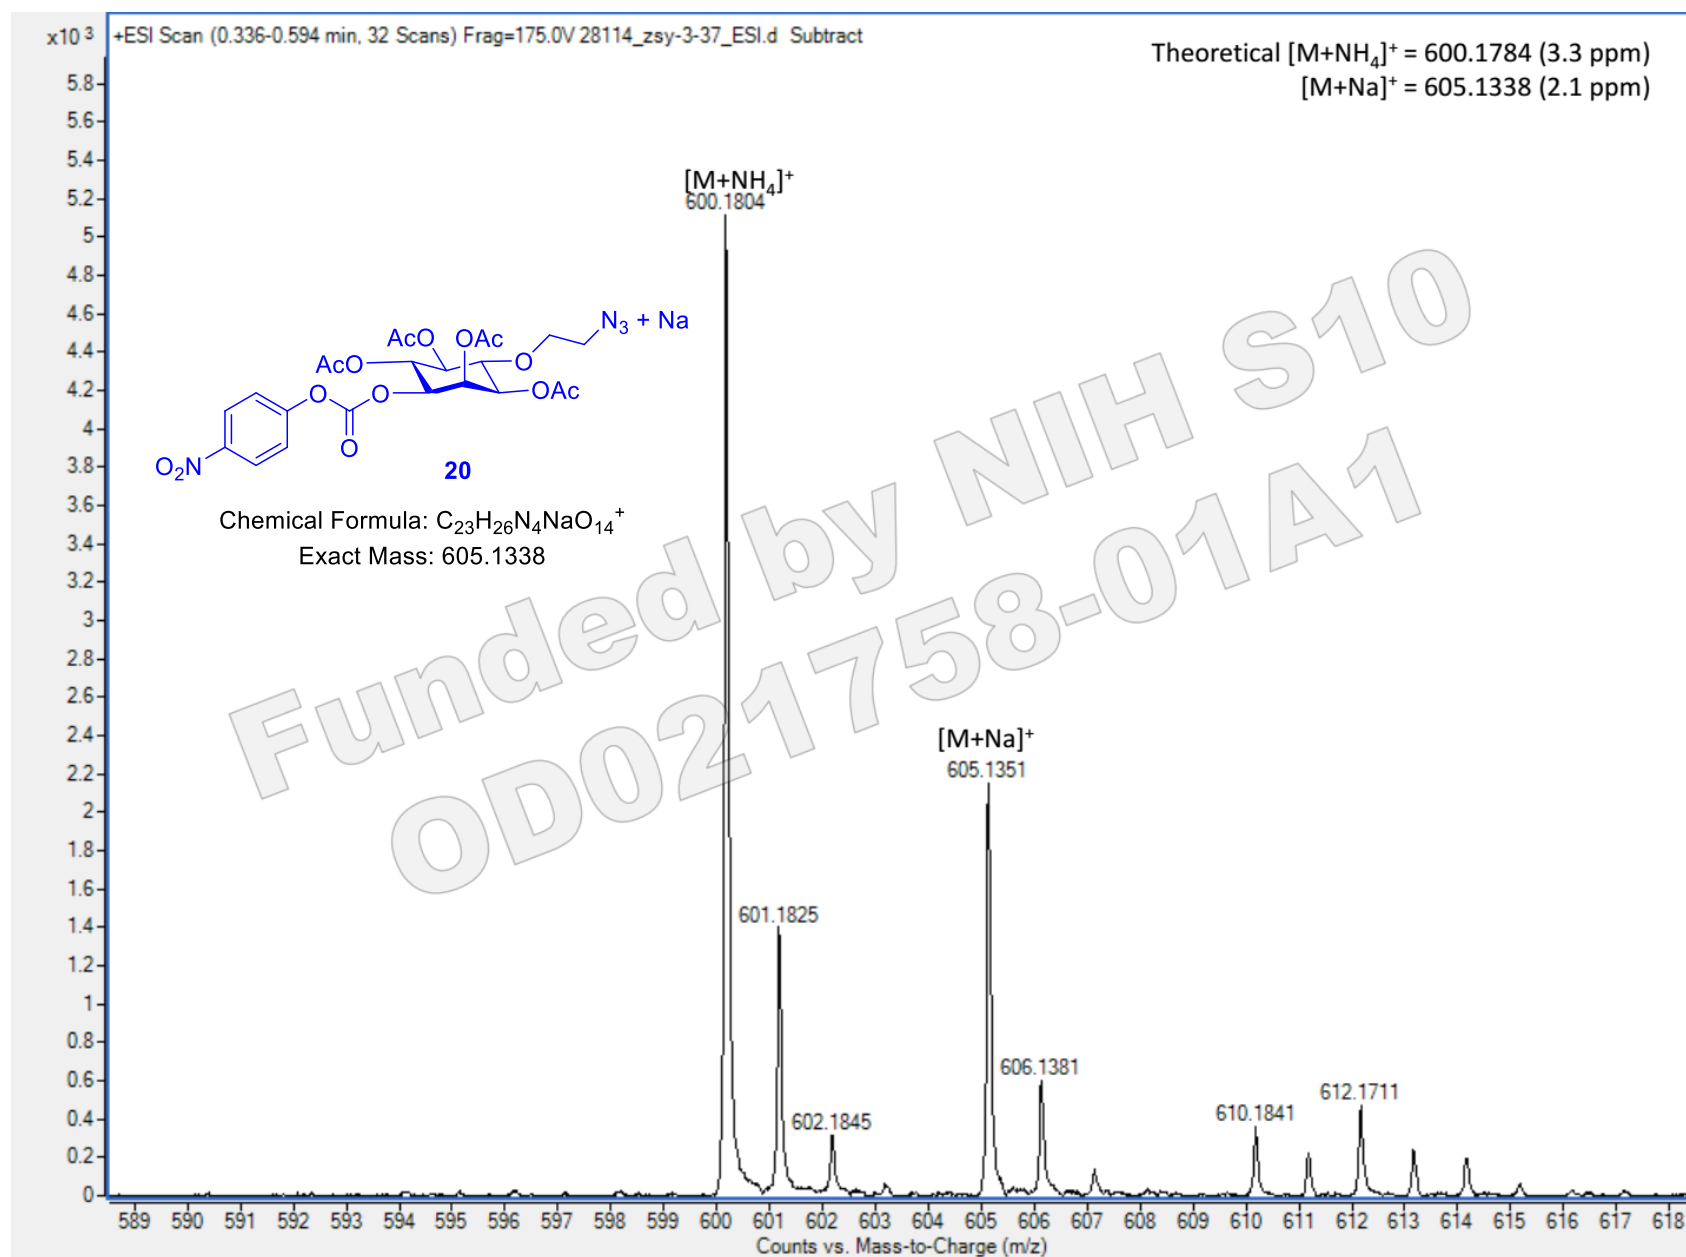

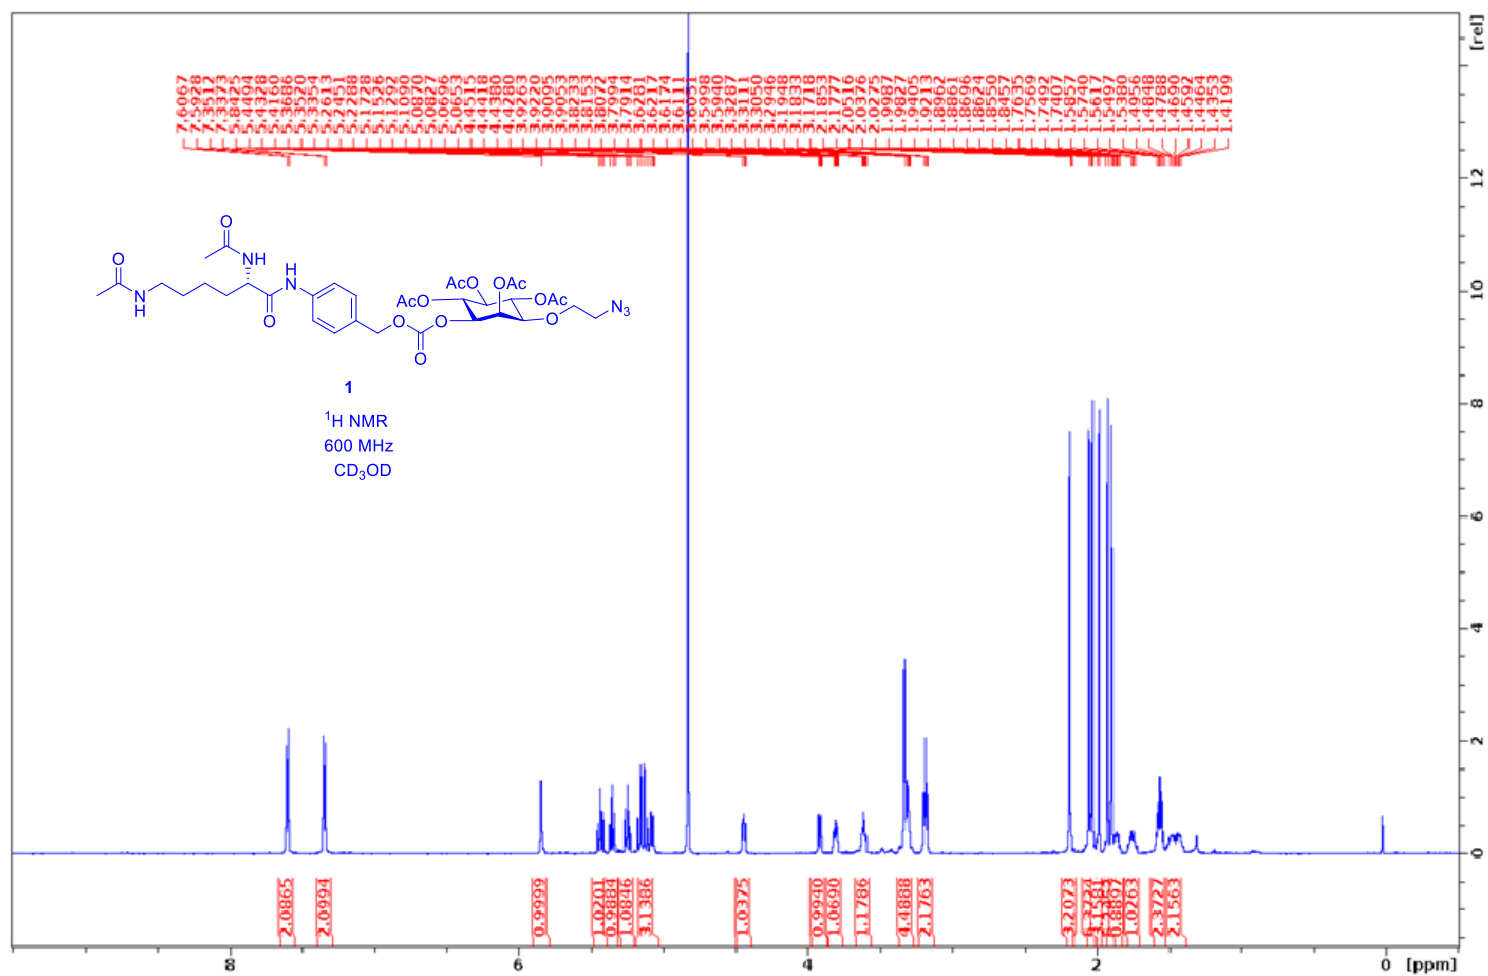

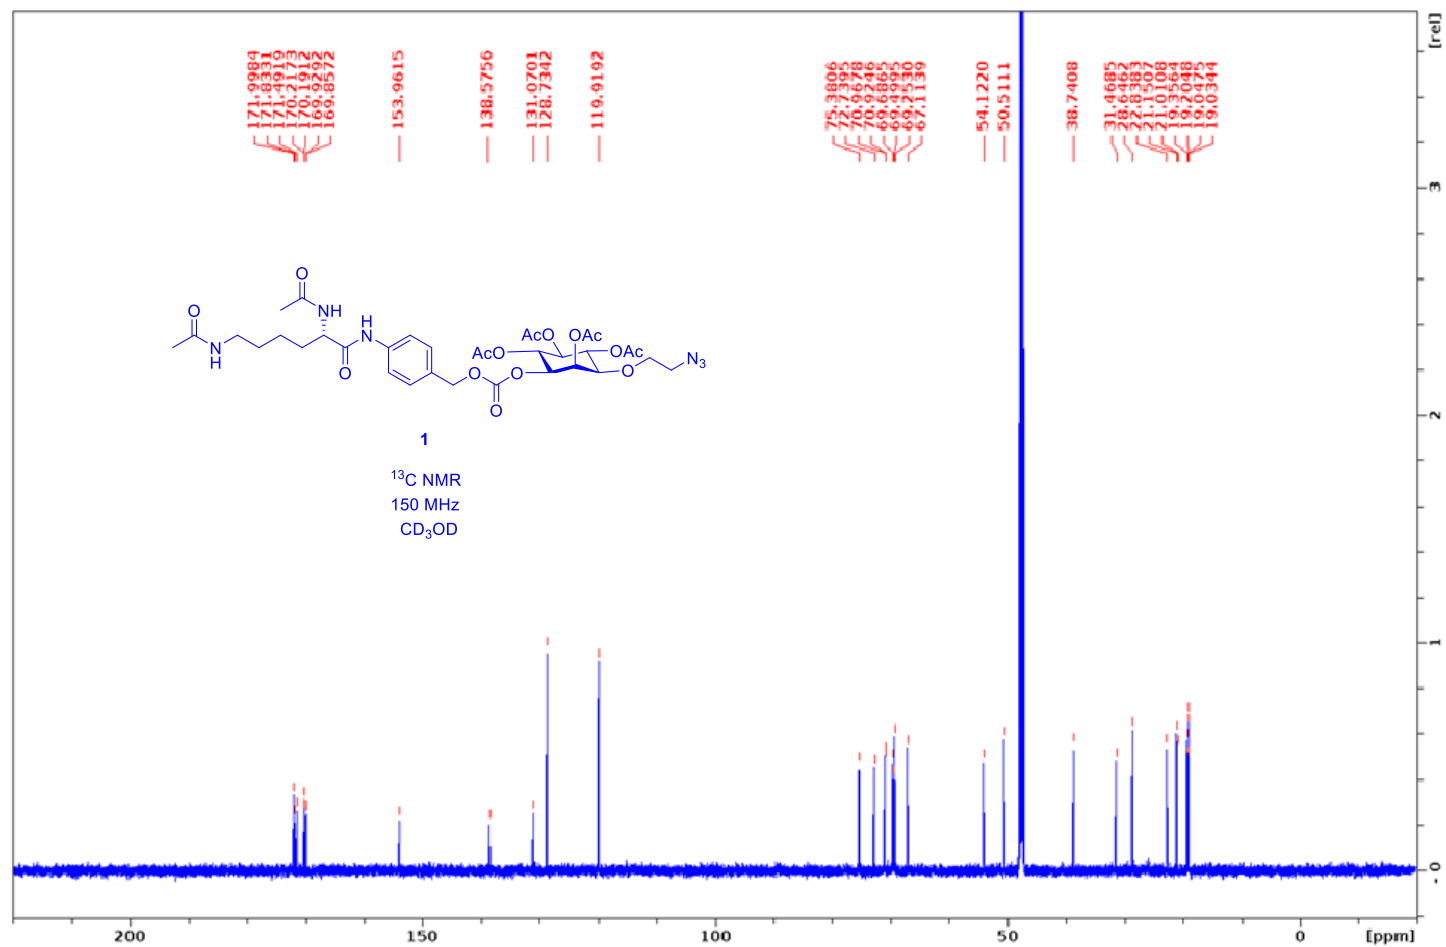

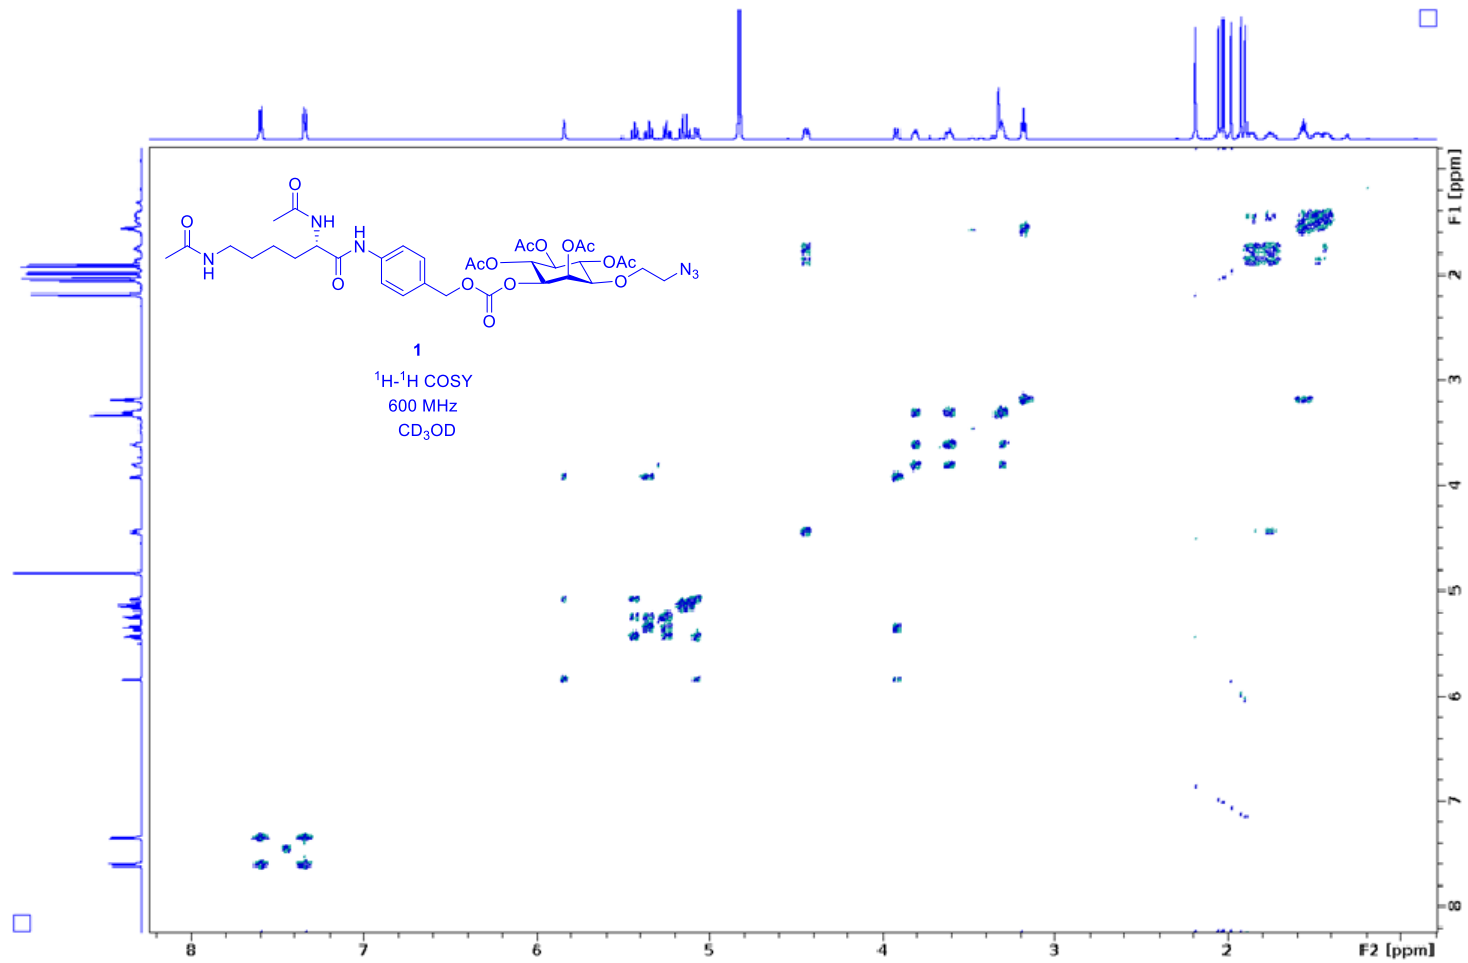

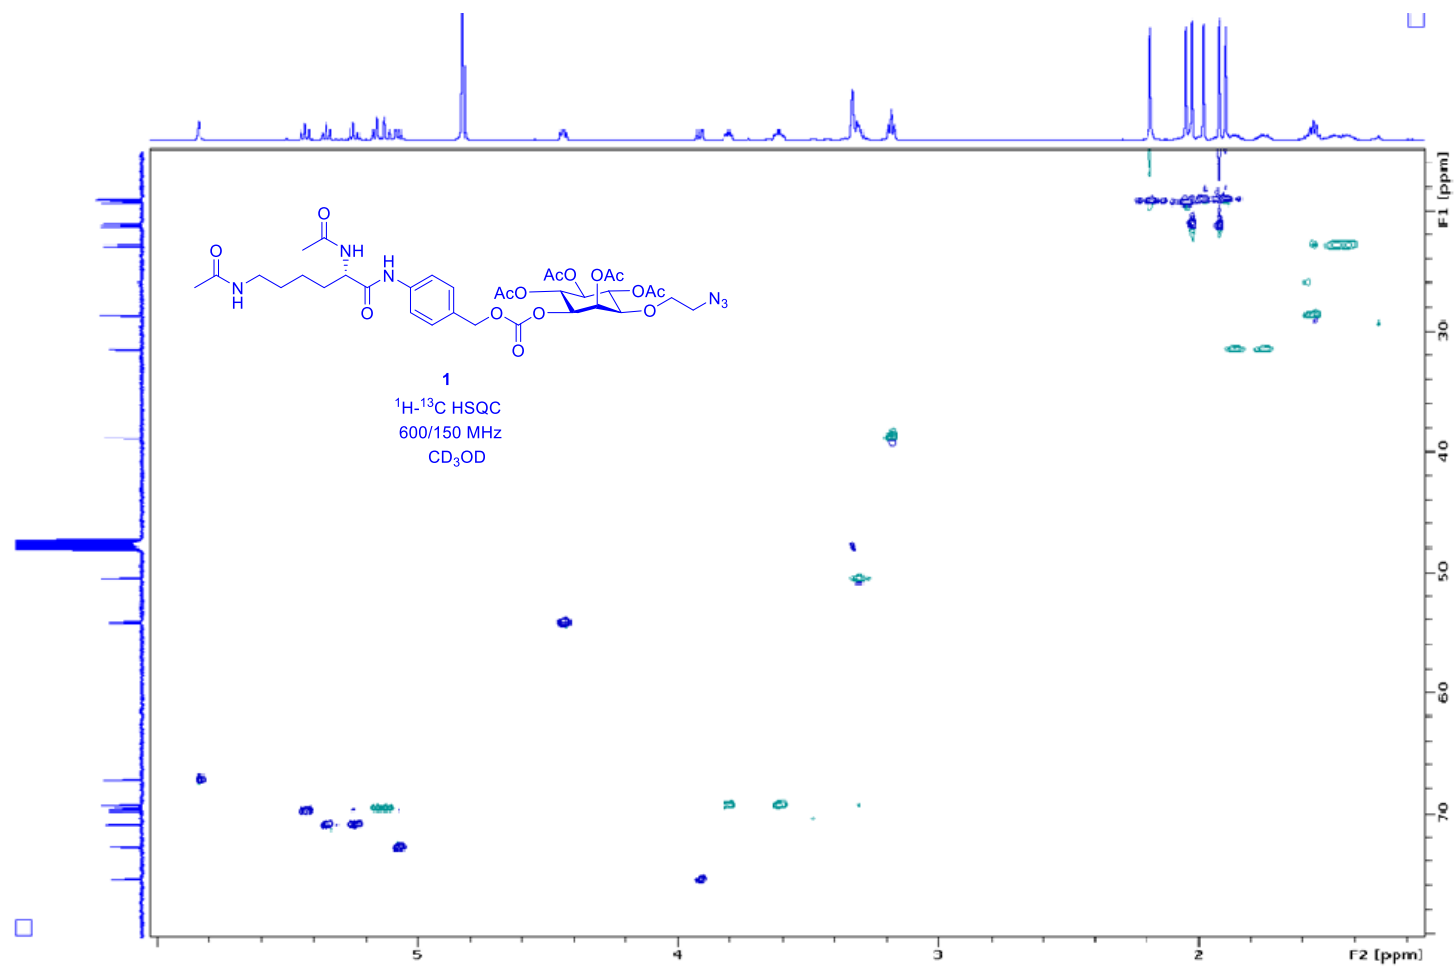

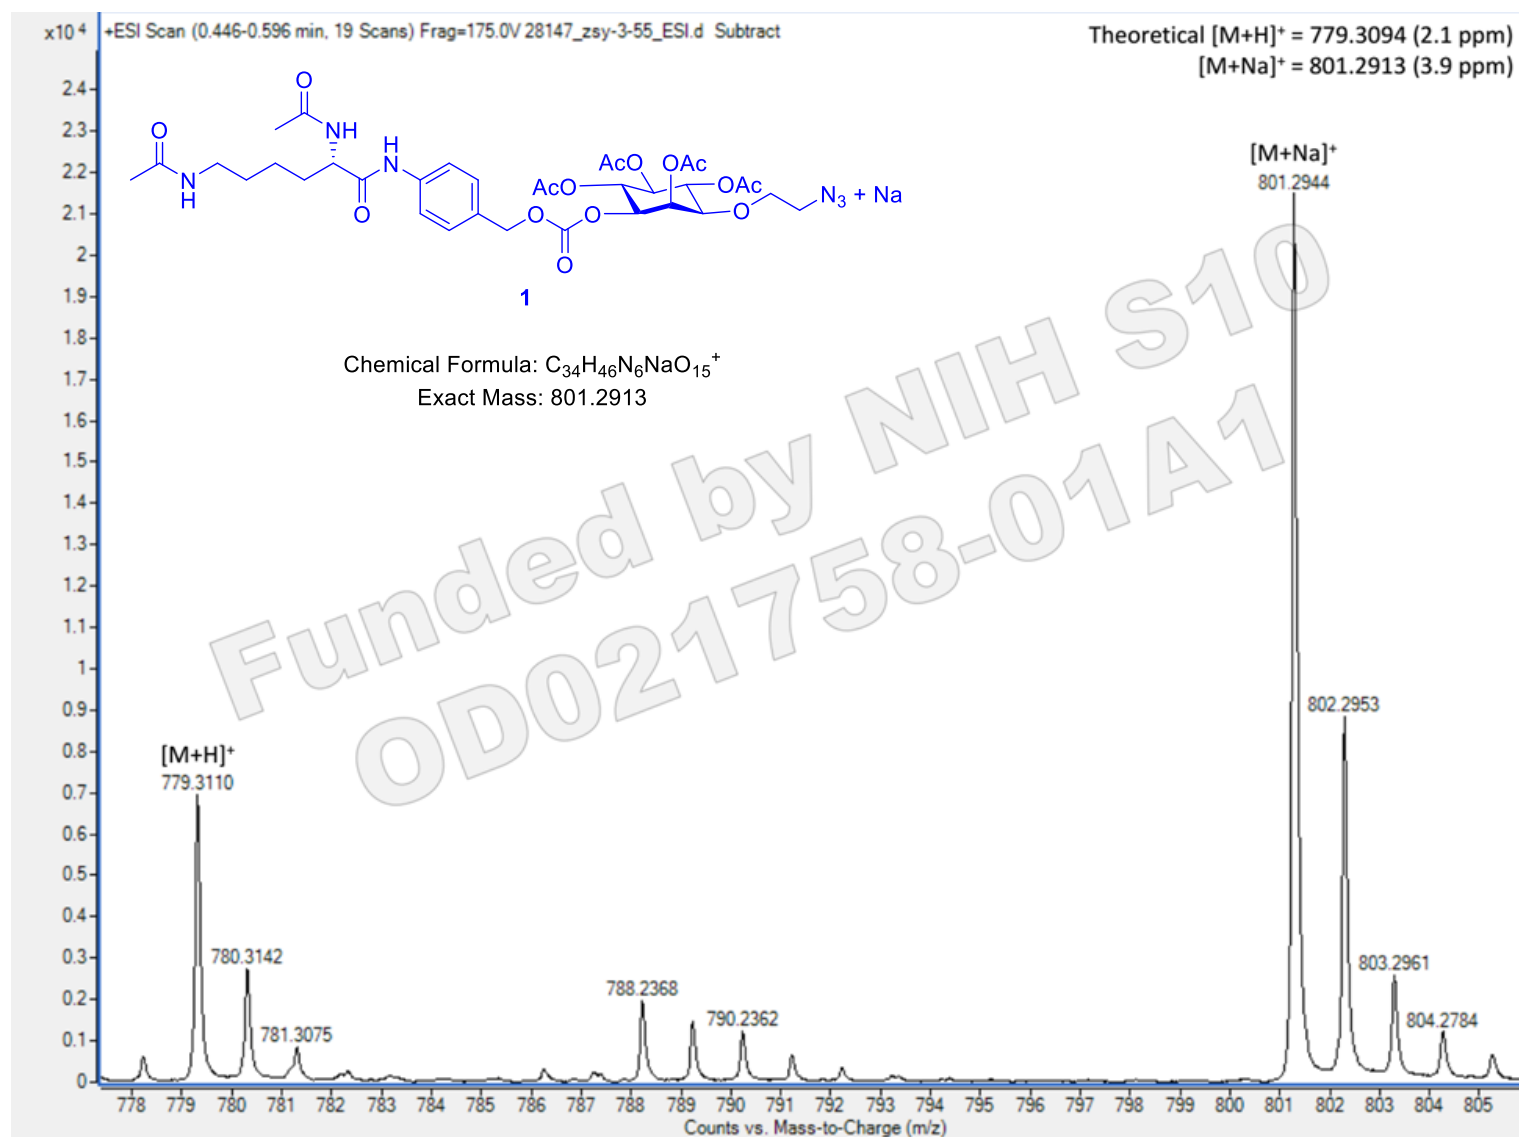

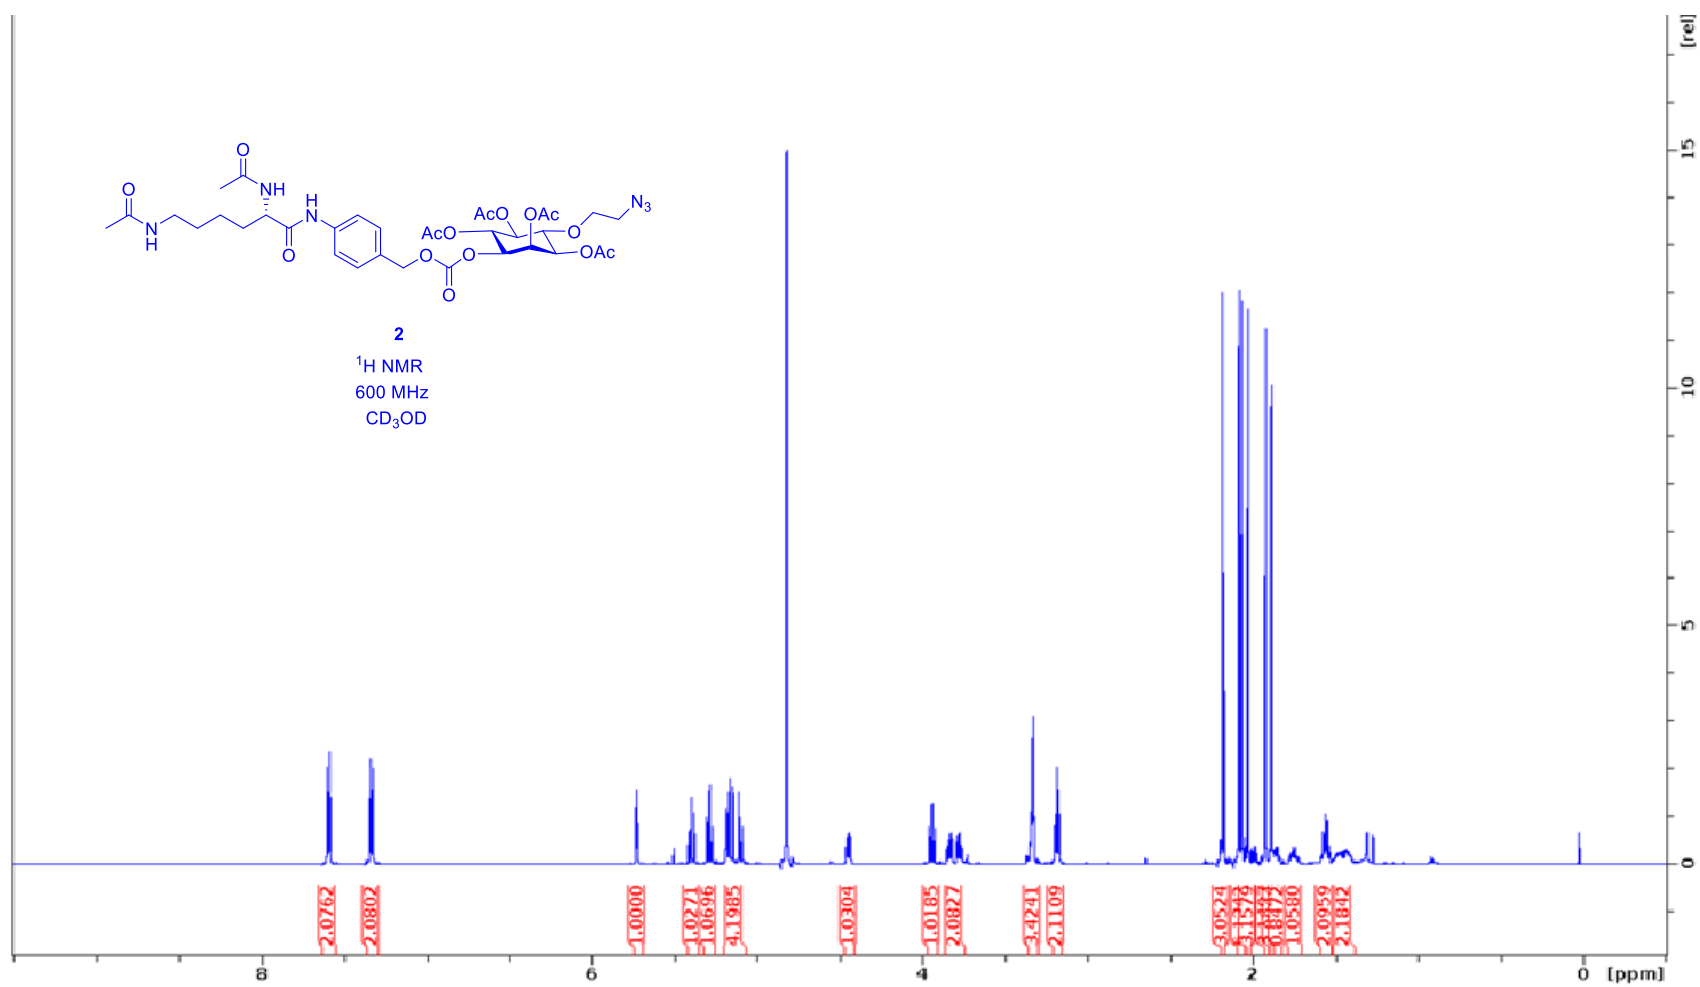



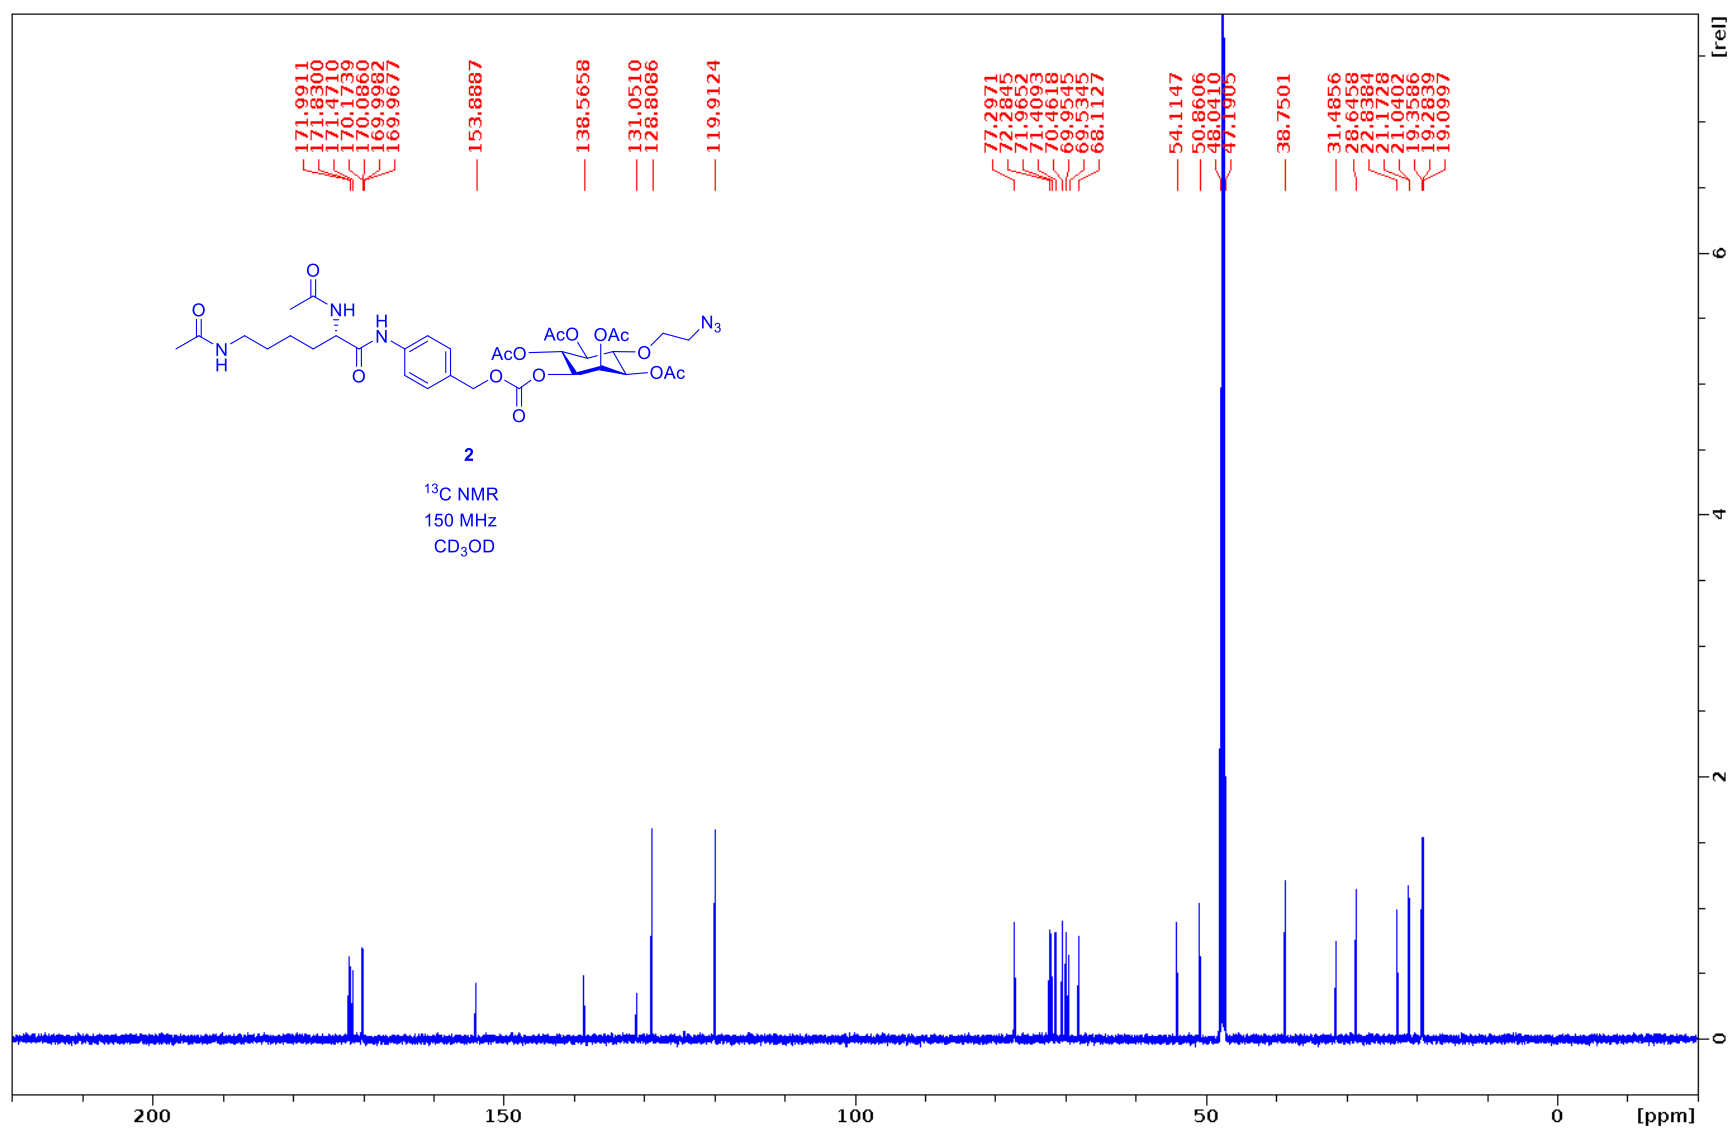

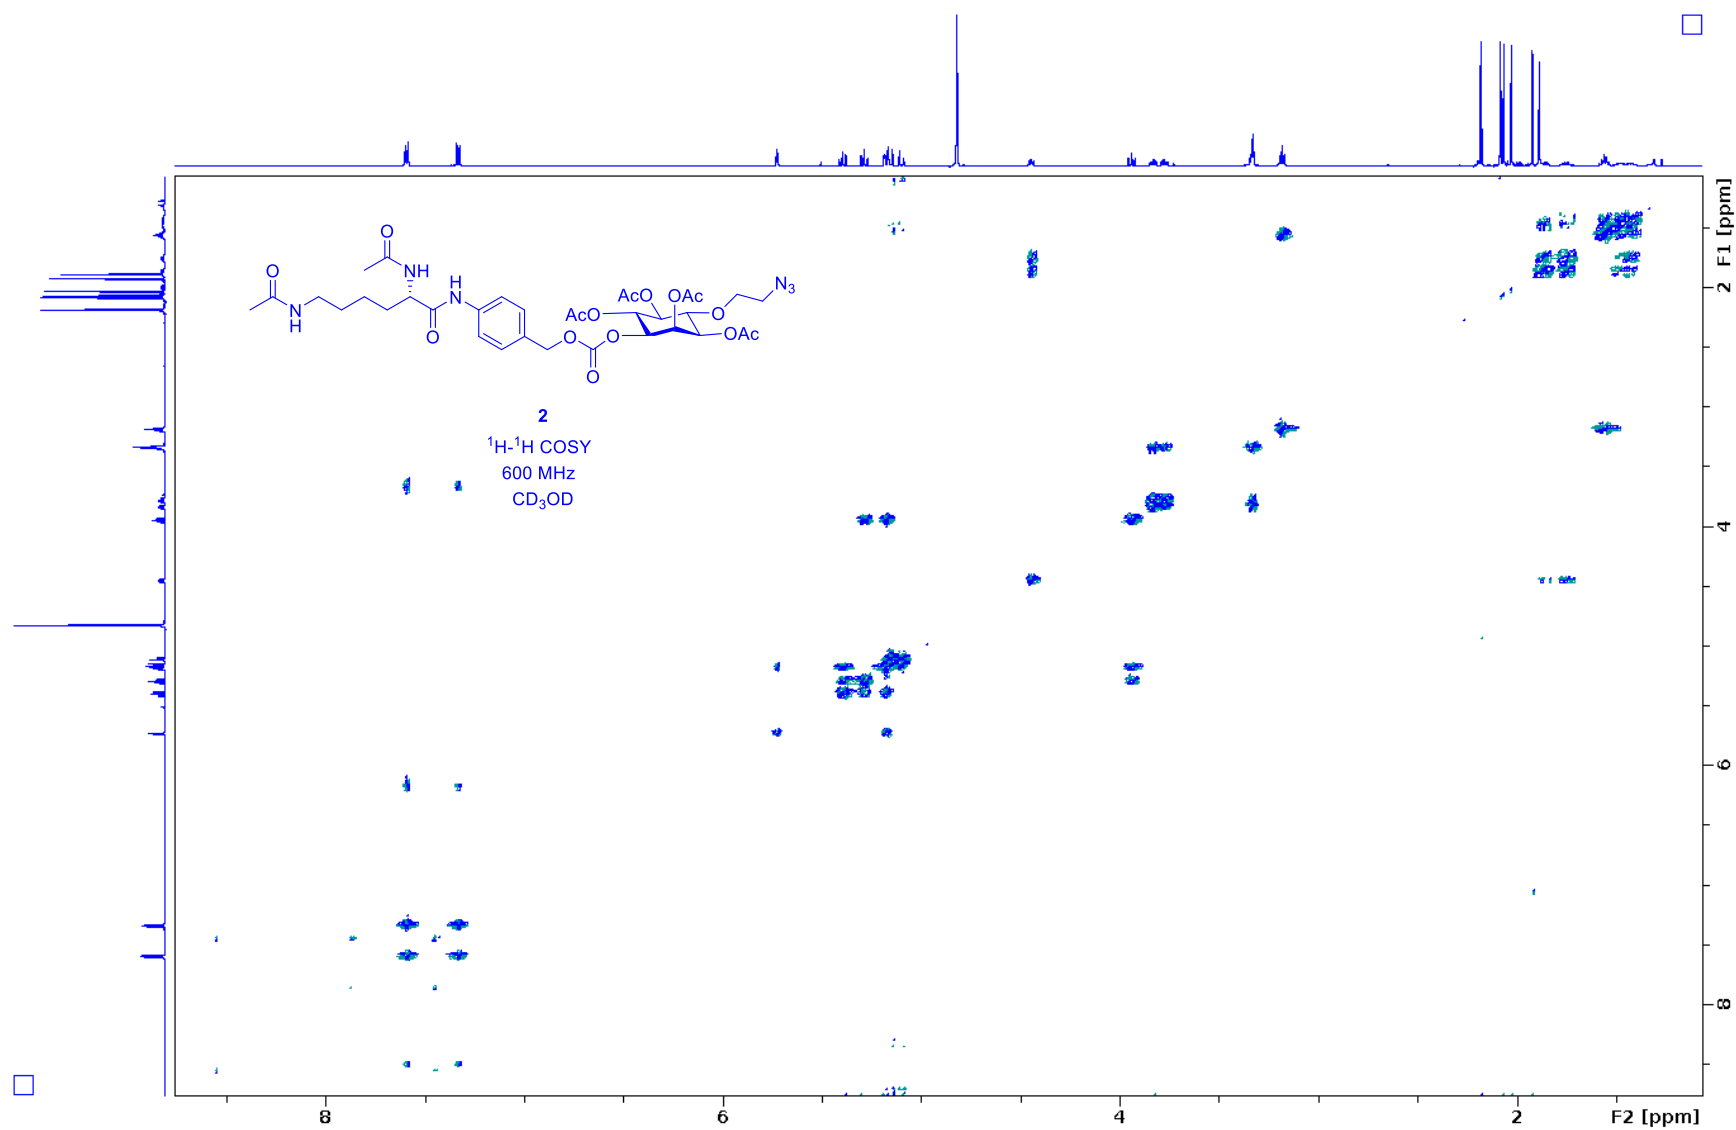



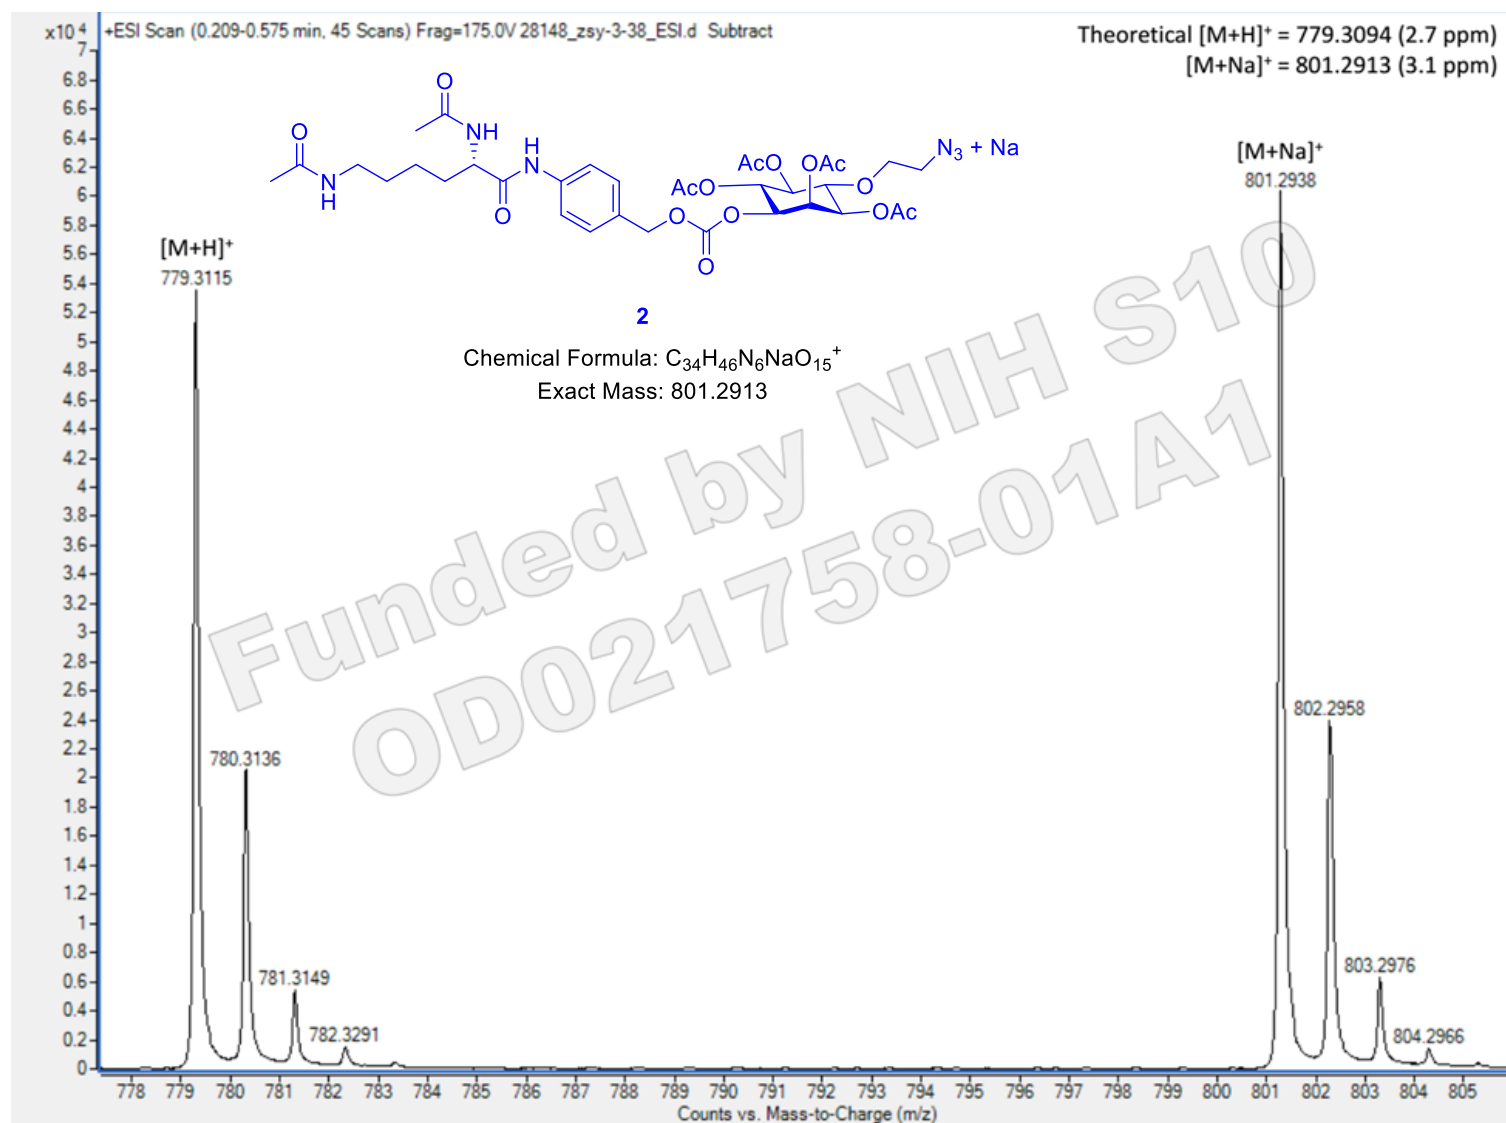

Supplement: d0ob00333f1.pdf [file d0ob00333f1.pdf]
